# Supplementary material for: Unravelling the kinetics of electro- and photochemical S → O linkage isomerization in Ru(ii)–NHC–DMSO complexes utilised for photoinduced substitution reactions
Source: Royal Society of Chemistry journal article supplement (doi:10.1039/d4dt01200c), 2024-01-01
Supplement: d4dt01200c1.pdf [file d4dt01200c1.pdf]

## Supplementary Information

# Unravelling the kinetics of electro- and photochemical S→O linkage isomerization in Ru(II)-NHC-DMSO complexes utilised for photoinduced substitution reactions

Nida Shahid<sup>a</sup> and Amrendra K. Singh<sup>\*a</sup>

<sup>a</sup>Department of Chemistry, Indian Institute of Technology Indore, Indore 453552, India.

Email: aks@iiti.ac.in

### Table of Contents

| S. No. | Contents                                                                                                                                                                                    | Page No.     |
|--------|---------------------------------------------------------------------------------------------------------------------------------------------------------------------------------------------|--------------|
| 1.     | <b>Figure S1.</b> <sup>1</sup> H NMR of complex <b>2a</b> recorded in DMSO-d <sub>6</sub> .                                                                                                 | <b>S4</b>    |
| 2.     | <b>Figure S2.</b> <sup>1</sup> H NMR of complex <b>2b</b> recorded in DMSO-d <sub>6</sub> .                                                                                                 | <b>S5</b>    |
| 3.     | <b>Figure S3.</b> <sup>13</sup> C NMR spectrum of complex <b>2b</b> recorded in DMSO-d <sub>6</sub> .                                                                                       | <b>S6</b>    |
| 4.     | <b>Figure S4.</b> UV-Vis spectrum of complex <b>2a</b> recorded in MeOH. LCMS and HRMS of complex <b>2b</b> .                                                                               | <b>S7</b>    |
| 5.     | <b>Figure S5.</b> UV-Vis spectrum of complex <b>2b</b> recorded in MeOH.                                                                                                                    | <b>S8</b>    |
| 6.     | <b>Figure S6-S7</b> LCMS of complex <b>2a</b> and <b>2b</b> .                                                                                                                               | <b>S9-10</b> |
| 7.     | <b>Figure S8.</b> Stack plots of molar absorption coefficients of <b>2a</b> and <b>2b</b> .                                                                                                 | <b>S11</b>   |
| 8.     | <b>Figure S9.</b> LCMS and HRMS of complex <b>2a'</b> .                                                                                                                                     | <b>S13</b>   |
| 9.     | <b>Figure S10.</b> UV-Vis spectrum of complex <b>2a'</b> recorded in MeOH at room temperature and FTIR spectrum of complex <b>2a'</b> recorded in solid state.                              | <b>S14</b>   |
| 10.    | <b>Figure S11.</b> Comparative IR spectra of <b>2a</b> (up) and <b>2a'</b> (down) for the identification of IR bands for S=O in Ru-NHC-(DMSO) <sub>2</sub> complex.                         | <b>S15</b>   |
| 11.    | <b>Figure S12.</b> Cyclic voltammogram and DPV of complex <b>2a'</b> recorded in CH <sub>2</sub> Cl <sub>2</sub> using 0.1 M NH <sub>4</sub> PF <sub>6</sub> as the supporting electrolyte. | <b>S16</b>   |
| 12.    | <b>Figure S13.</b> LCMS and HRMS of complex <b>2b'</b> .                                                                                                                                    | <b>S17</b>   |

|     |                                                                                                                                                                                                                                           |                |
|-----|-------------------------------------------------------------------------------------------------------------------------------------------------------------------------------------------------------------------------------------------|----------------|
| 13. | <b>Figure S14.</b> (a) UV-Vis spectrum of complex <b>2b'</b> recorded in DCM at room temperature and (b) FT-IR spectrum of complex <b>2b'</b> recorded in solid state.                                                                    | <b>S18</b>     |
| 14. | <b>Figure S15.</b> Comparative IR spectra of <b>2b</b> (up) and <b>2b'</b> (down) for the identification of IR bands for S=O in Ru-NHC-(DMSO) <sub>2</sub> complex.                                                                       | <b>S19</b>     |
| 15. | <b>Figure S16.</b> Cyclic voltammogram and DPV of complex <b>2b'</b> recorded in CH <sub>2</sub> Cl <sub>2</sub> using 0.1 M NH <sub>4</sub> PF <sub>6</sub> as the supporting electrolyte                                                | <b>S20</b>     |
| 16. | <b>Figure S17.</b> LCMS and HRMS of complex <b>3a</b> .                                                                                                                                                                                   | <b>S21</b>     |
| 17. | <b>Figure S18-20.</b> <sup>1</sup> H, <sup>13</sup> C, and <sup>31</sup> P NMR spectra of complex <b>3a</b> in DMSO-d <sub>6</sub>                                                                                                        | <b>S22-S24</b> |
| 18. | <b>Figure S21.</b> IR spectrum of complex <b>3a</b> in solid state.                                                                                                                                                                       | <b>S25</b>     |
| 19. | <b>Figure S22.</b> UV-Vis spectrum of complex <b>3a</b> recorded in MeOH.                                                                                                                                                                 | <b>S26</b>     |
| 20. | <b>Figure S23.</b> ORTEP diagram of complex <b>3a</b> obtained from X-ray diffraction.                                                                                                                                                    | <b>S27</b>     |
| 21. | <b>Figure S24.</b> LCMS and HRMS of complex <b>3b</b> .                                                                                                                                                                                   | <b>S28</b>     |
| 22. | <b>Figure S25-27.</b> <sup>1</sup> H, <sup>13</sup> C, and <sup>31</sup> P NMR spectra of complex <b>3b</b> in DMSO-d <sub>6</sub>                                                                                                        | <b>S29-S31</b> |
| 23. | <b>Figure S28.</b> IR spectrum of complex <b>3b</b> in solid state.                                                                                                                                                                       | <b>S32</b>     |
| 24. | <b>Figure S29.</b> UV-Vis spectrum of complex <b>3b</b> recorded in MeOH.                                                                                                                                                                 | <b>S33</b>     |
| 25. | <b>Figure S30.</b> Stack plots of molar absorption coefficients of <b>3a</b> and <b>3b</b> .                                                                                                                                              | <b>S34</b>     |
| 26. | <b>Figure S31.</b> DPV of complexes <b>2a</b> and <b>2b</b> recorded in CH <sub>2</sub> Cl <sub>2</sub> .                                                                                                                                 | <b>S35</b>     |
| 27. | <b>Figure S32.</b> Cyclic voltammograms of <b>2a</b> in 0.1 M TBAH, CH <sub>2</sub> Cl <sub>2</sub> , at scan rates between 20 mV/s to 800 mV/s, after applying the CPE for 5 minutes at 2 V.                                             | <b>S37</b>     |
| 28. | <b>Figure S33.</b> Cyclic voltammograms of <b>2a</b> in 0.1 M TBAH, CH <sub>2</sub> Cl <sub>2</sub> , at scan rates between 20 mV/s to 800 mV/s, after applying the CPE for 5 minutes at -2 V.                                            | <b>S38</b>     |
| 29. | <b>Figure S34.</b> Plots of (a) $ic_1/ic_2$ vs. inverse of the scan rate to obtain $K^{III_{OS}}$ (b) $\ln(ia_2/\sqrt{v})$ vs. inverse of the scan rate to obtain $k^{II_{O\rightarrow S}}$ isomerization constant in complex <b>2a</b> . | <b>S39</b>     |
| 30. | <b>Figure S35.</b> Plot of $i_k/i_d$ vs. $\sqrt{v}$ to obtain $k^{III_{O\rightarrow S}}$ and $k^{III_{S\rightarrow O}}$ for complex <b>2a</b> .                                                                                           | <b>S40</b>     |
| 31. | <b>Figure S36.</b> Cyclic voltammograms of <b>2b</b> in 0.1 M TBAH, CH <sub>2</sub> Cl <sub>2</sub> , at scan rates between 20 mV/s to 800 mV/s, after applying the CPE for 5 minutes at 2 V.                                             | <b>S41</b>     |
| 32. | <b>Figure S37.</b> Cyclic voltammograms of <b>2b</b> in 0.1 M TBAH, CH <sub>2</sub> Cl <sub>2</sub> , at scan rates between 20 mV/s to 800 mV/s, after applying the CPE for 5 minutes at -2 V.                                            | <b>S42</b>     |
| 33. | <b>Figure S38.</b> Plots of (a) $ic_1/ic_2$ vs. inverse of the scan rate to obtain                                                                                                                                                        | <b>S43</b>     |

|            |                                                                                                                                                                                                                                                                                                                                        |                |
|------------|----------------------------------------------------------------------------------------------------------------------------------------------------------------------------------------------------------------------------------------------------------------------------------------------------------------------------------------|----------------|
|            | $K^{\text{III}_{\text{O}\rightarrow\text{S}}}$ (b) $\ln(i_{\text{a}2}/\sqrt{v})$ vs. inverse of the scan rate to obtain $k^{\text{II}_{\text{O}\rightarrow\text{S}}}$ isomerization constant in complex <b>2b</b> .                                                                                                                    |                |
| <b>34.</b> | <b>Figure S39.</b> Plot of $i_{\text{k}}/i_{\text{d}}$ vs. $\sqrt{v}$ to obtain $k^{\text{III}_{\text{O}\rightarrow\text{S}}}$ and $k^{\text{III}_{\text{S}\rightarrow\text{O}}}$ for complex <b>2b</b> .                                                                                                                              | <b>S44</b>     |
| <b>35.</b> | <b>Figure S40.</b> Cyclic voltammograms of <b>3a</b> in 0.1 M TBAH, $\text{CH}_2\text{Cl}_2$ , at scan rates between 20 mV/s to 800 mV/s, after applying the CPE for 5 minutes at 2 V.                                                                                                                                                 | <b>S45</b>     |
| <b>36.</b> | <b>Figure S41.</b> Cyclic voltammograms of <b>3a</b> in 0.1 M TBAH, $\text{CH}_2\text{Cl}_2$ , at scan rates between 20 mV/s to 800 mV/s, after applying the CPE for 5 minutes at -2 V.                                                                                                                                                | <b>S46</b>     |
| <b>37.</b> | <b>Figure S42.</b> Plots of (a) $i_{\text{c}1}/i_{\text{c}2}$ vs. inverse of the scan rate to obtain $K^{\text{III}_{\text{O}\rightarrow\text{S}}}$ (b) $\ln(i_{\text{a}2}/\sqrt{v})$ vs. inverse of the scan rate to obtain $k^{\text{II}_{\text{O}\rightarrow\text{S}}}$ for S-O isomerization of DMSO ligand of complex <b>3a</b> . | <b>S47</b>     |
| <b>38.</b> | <b>Figure S43.</b> Plot of $i_{\text{k}}/i_{\text{d}}$ vs. $\sqrt{v}$ to obtain $k^{\text{III}_{\text{O}\rightarrow\text{S}}}$ and $k^{\text{III}_{\text{S}\rightarrow\text{O}}}$ for complex <b>3a</b> .                                                                                                                              | <b>S48</b>     |
| <b>39.</b> | <b>Figure S44.</b> Cyclic voltammograms of <b>3b</b> in 0.1 M TBAH, $\text{CH}_2\text{Cl}_2$ , at scan rates between 20 mV/s to 800 mV/s, after applying the CPE for 5 minutes at 2 V.                                                                                                                                                 | <b>S49</b>     |
| <b>40.</b> | <b>Figure S45.</b> Cyclic voltammograms of <b>3b</b> in 0.1 M TBAH, $\text{CH}_2\text{Cl}_2$ , at scan rates between 20 mV/s to 800 mV/s, after applying the CPE for 5 minutes at -2 V.                                                                                                                                                | <b>S50</b>     |
| <b>41.</b> | <b>Figure S46.</b> Plots of (a) $i_{\text{c}1}/i_{\text{c}2}$ vs. inverse of the scan rate to obtain $K^{\text{III}_{\text{O}\rightarrow\text{S}}}$ (b) $\ln(i_{\text{a}2}/\sqrt{v})$ vs. inverse of the scan rate to obtain $k^{\text{II}_{\text{O}\rightarrow\text{S}}}$ for S-O isomerization of DMSO ligand of complex <b>3b</b> . | <b>S51</b>     |
| <b>42.</b> | <b>Figure S47.</b> Plot of $i_{\text{k}}/i_{\text{d}}$ vs. $\sqrt{v}$ to obtain $k^{\text{III}_{\text{O}\rightarrow\text{S}}}$ and $k^{\text{III}_{\text{S}\rightarrow\text{O}}}$ for complex <b>3a</b> .                                                                                                                              | <b>S52</b>     |
| <b>43.</b> | <b>Figure S48.</b> UV-vis spectrum of complex <b>2a</b> before and after irradiation, inset showing the lower energy absorption of irradiated sample of <b>2a</b> .                                                                                                                                                                    | <b>S53</b>     |
| <b>44.</b> | <b>Figure S48-51.</b> Kinetics of reversion of O→S form in complexes <b>2a</b> , <b>2b</b> , <b>3a</b> , and <b>3b</b> in dark conditions.                                                                                                                                                                                             | <b>S54-57</b>  |
| <b>45.</b> | <b>Figure S49.</b> Comparative UV-vis spectra of complex <b>3b</b> synthesized in thermochemical and photochemical reaction conditions                                                                                                                                                                                                 | <b>S58</b>     |
| <b>46.</b> | <b>Scheme S1.</b> Synthesis of Ru(II)-PyNHC-(DMS) <sub>2</sub> complexes <b>2a'</b> and <b>2b'</b> from Ru(III)-NHC complexes <b>1a</b> and <b>1b</b> respectively.                                                                                                                                                                    | <b>S12</b>     |
| <b>47.</b> | <b>Table S1.</b> Mathematical formulae to calculate the equilibrium and kinetics constants for the electrochemical S→O linkage isomerization.                                                                                                                                                                                          | <b>S36</b>     |
| <b>48.</b> | <b>Table S2.</b> Rate constants for the O→S reversion in complexes <b>2a</b> , <b>2b</b> , <b>3a</b> , and <b>3b</b> .                                                                                                                                                                                                                 | <b>S59</b>     |
| <b>49.</b> | <b>Table S3.</b> Crystallographic parameters of complex <b>2a</b>                                                                                                                                                                                                                                                                      | <b>S60</b>     |
| <b>50.</b> | <b>Table S4.</b> Selected bond lengths and angles for the complex <b>2a</b>                                                                                                                                                                                                                                                            | <b>S61</b>     |
| <b>51.</b> | XYZ coordinates for the optimized geometry of Ru <sup>II/III</sup> -S/O isomers of complexes <b>2a</b> and <b>3a</b>                                                                                                                                                                                                                   | <b>S62-S71</b> |

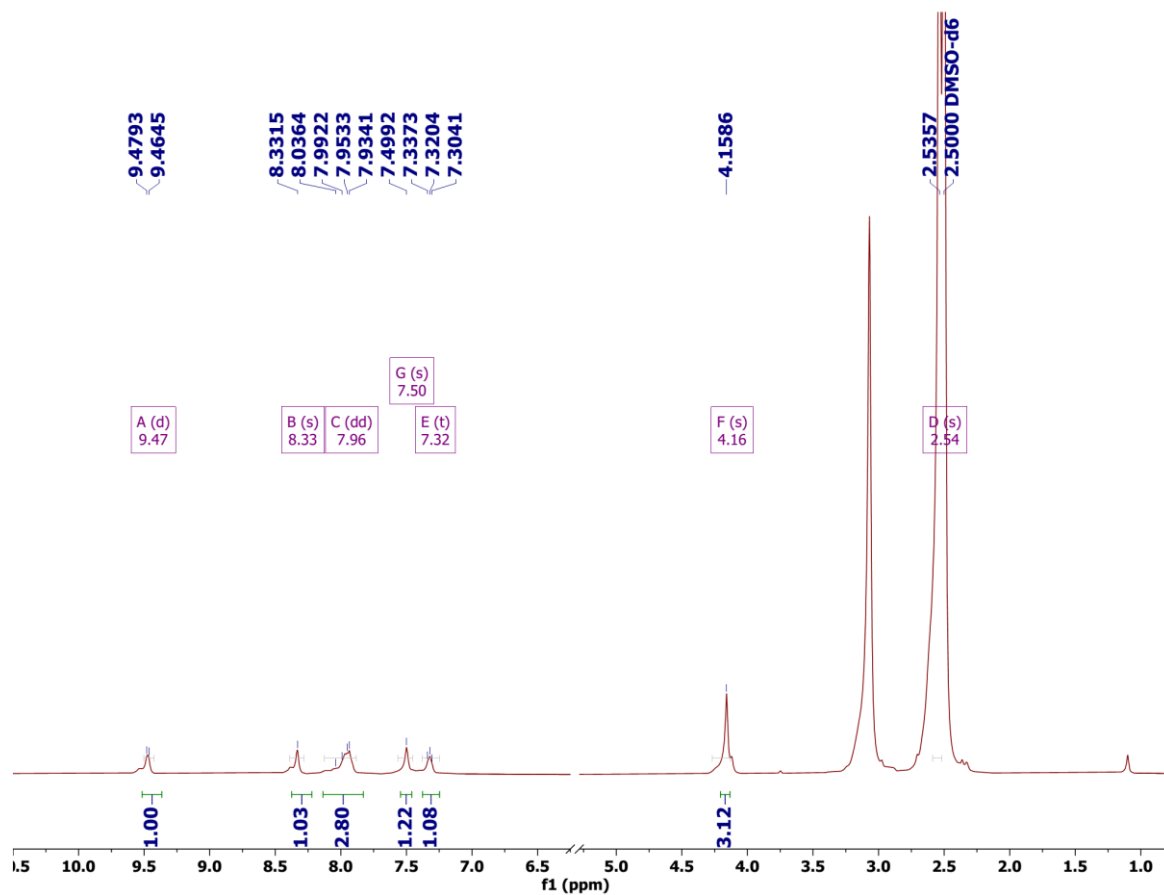

**Figure S1.**  $^1\text{H}$  NMR of complex **2a** recorded in  $\text{DMSO-d}_6$  at temperature 350 K.

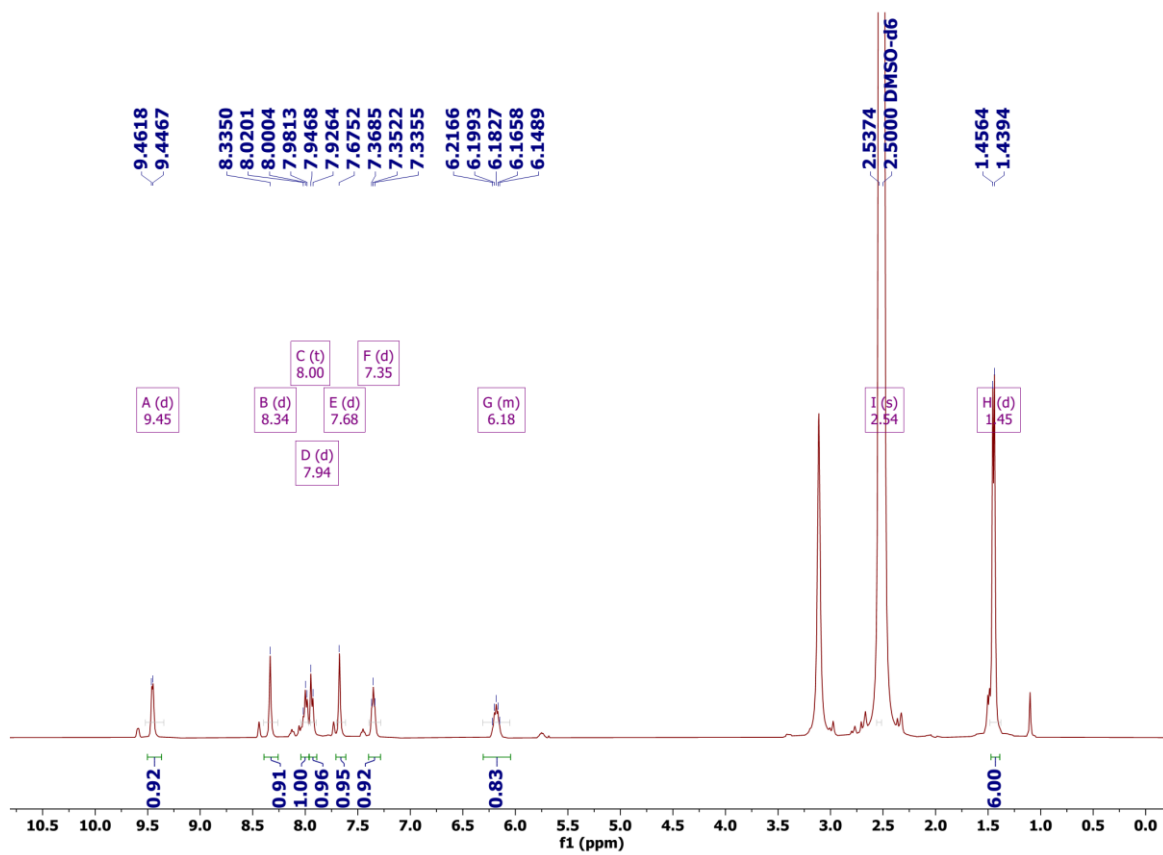

**Figure S2.**  $^1\text{H}$  NMR spectrum of complex **2b** recorded in DMSO- $\text{d}_6$  at temperature 350 K.

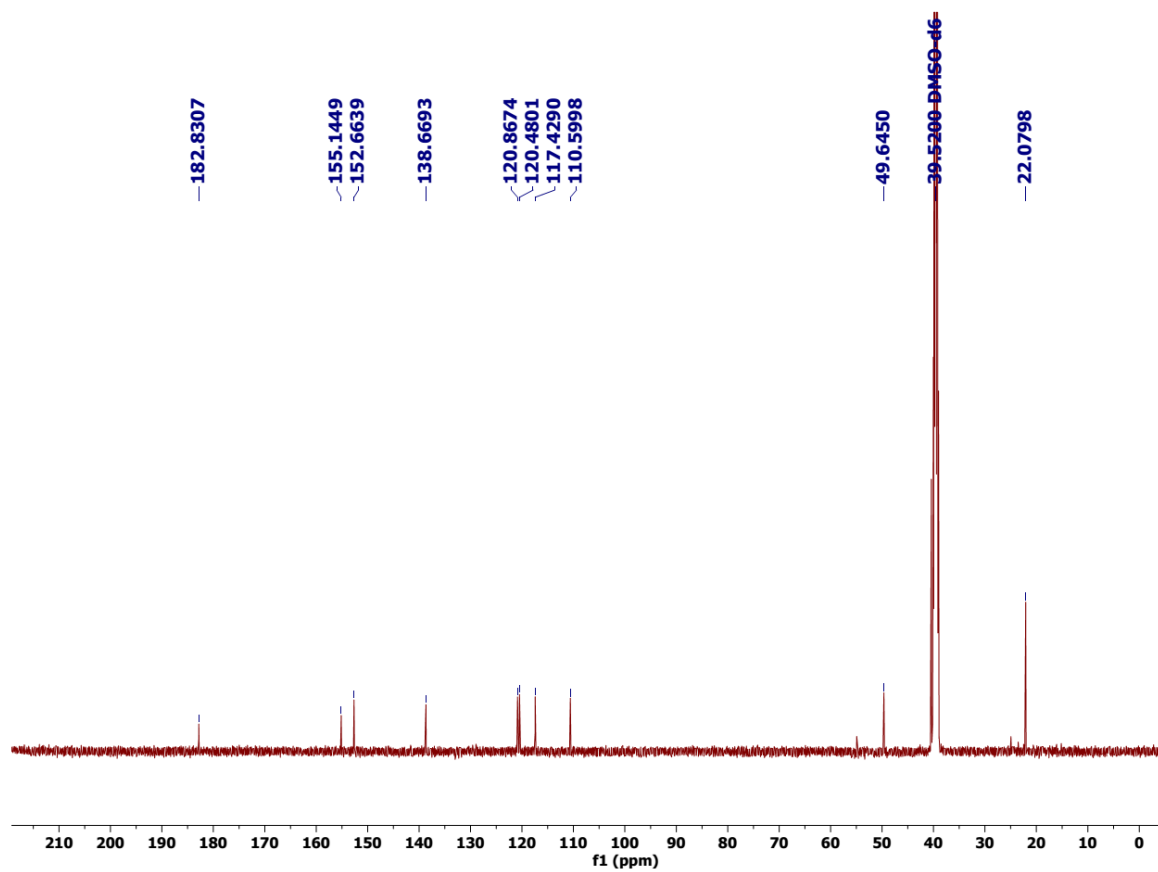

**Figure S3.**  $^{13}\text{C}$  NMR of complex **2b** recorded in  $\text{DMSO-d}_6$  at temperature 350 K.

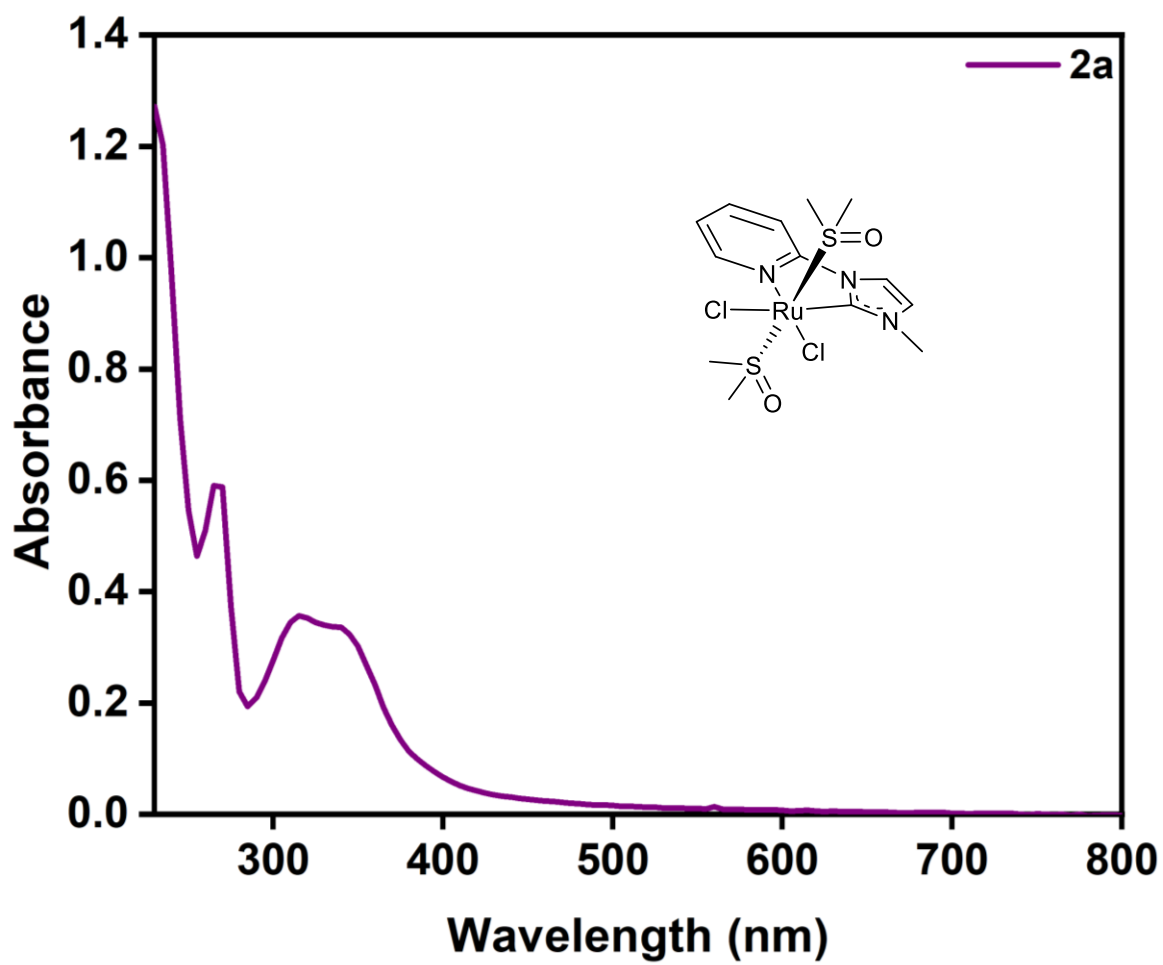

**Figure S4.** UV-Vis spectrum of complex **2a** recorded in MeOH at room temperature.

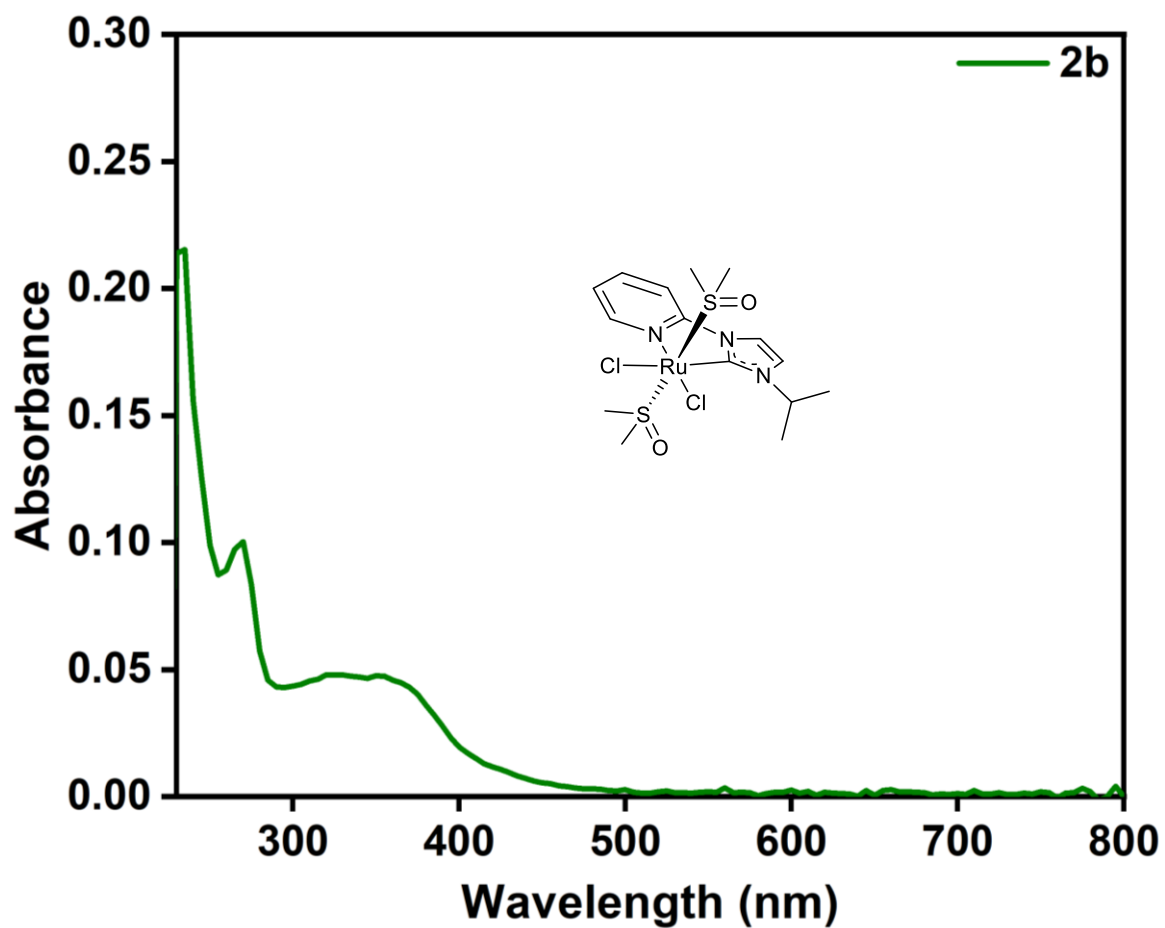

**Figure S5.** UV-Vis spectrum of complex **2b** recorded in MeOH at room temperature.



## Generic Display Report

### Analysis Info

Analysis Name F:\usual mass\m chem aks-nsh-1a-d2\_RC8\_01\_22858.d  
Method 8. LCMS tune wide MeOH.m  
Sample Name m chem aks-nsh-1a-d2  
Comment

Acquisition Date 09-02-2023 17:31:49

Operator IIT Indore  
Instrument micrOTOF-Q

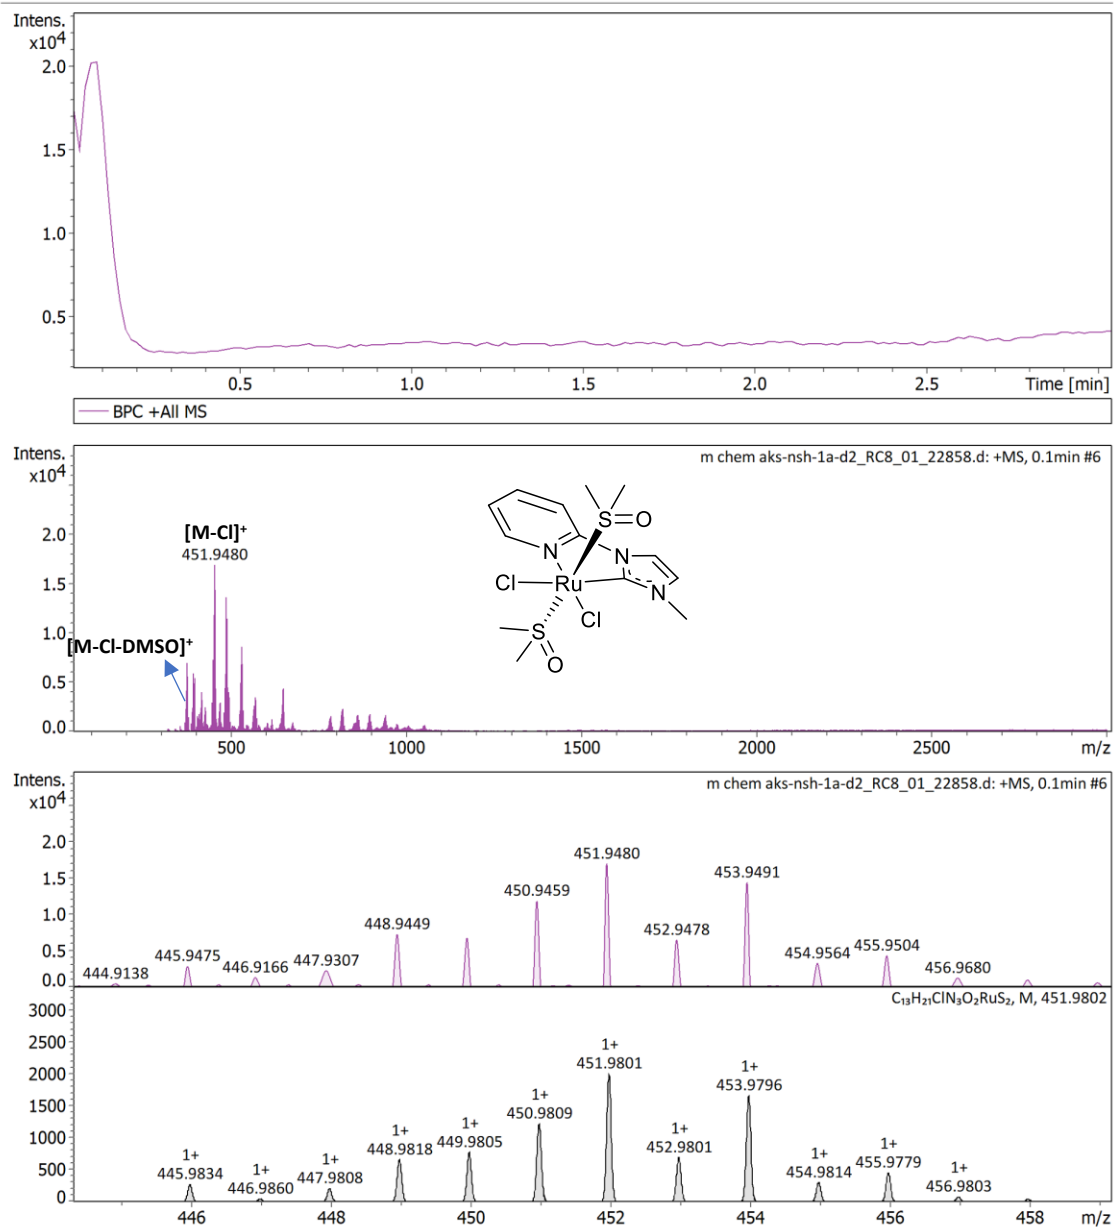

Figure S6. LCMS of complex 2a.

## Generic Display Report

|                      |                                                                        |                  |                     |
|----------------------|------------------------------------------------------------------------|------------------|---------------------|
| <b>Analysis Info</b> |                                                                        | Acquisition Date | 05-01-2023 09:45:20 |
| Analysis Name        | F:\Project 4\OneDrive_1_1-5-2023\m chem aks-nsh-1b-dmso_RC2_01_21518.d | Operator         | IIT Indore          |
| Method               | 1. LCMS tune low ACN.m                                                 | Instrument       | micrOTOF-Q          |
| Sample Name          | m chem aks-nsh-1b-dmso                                                 |                  |                     |
| Comment              |                                                                        |                  |                     |

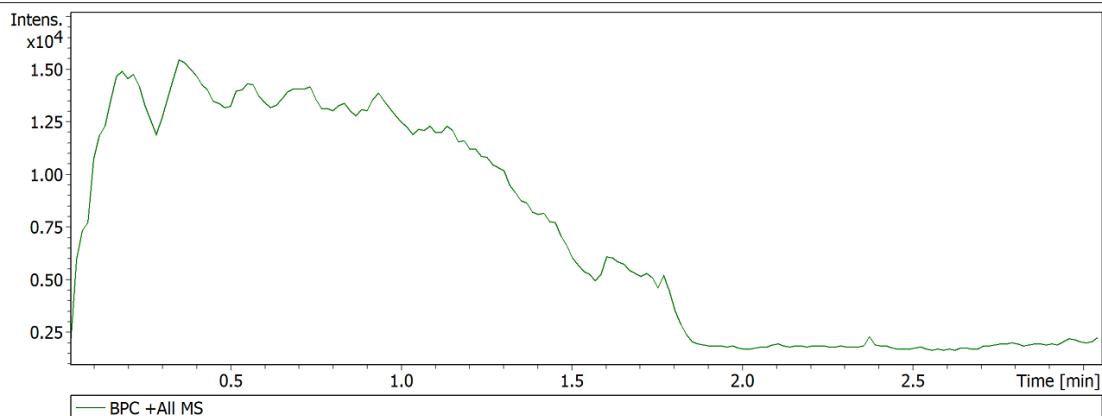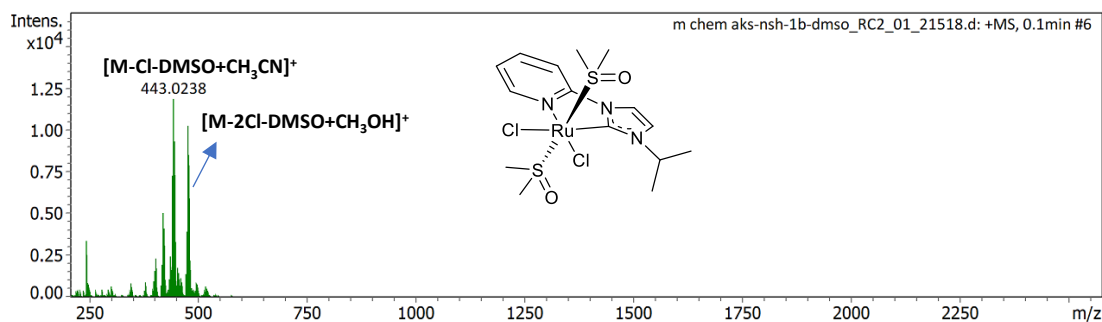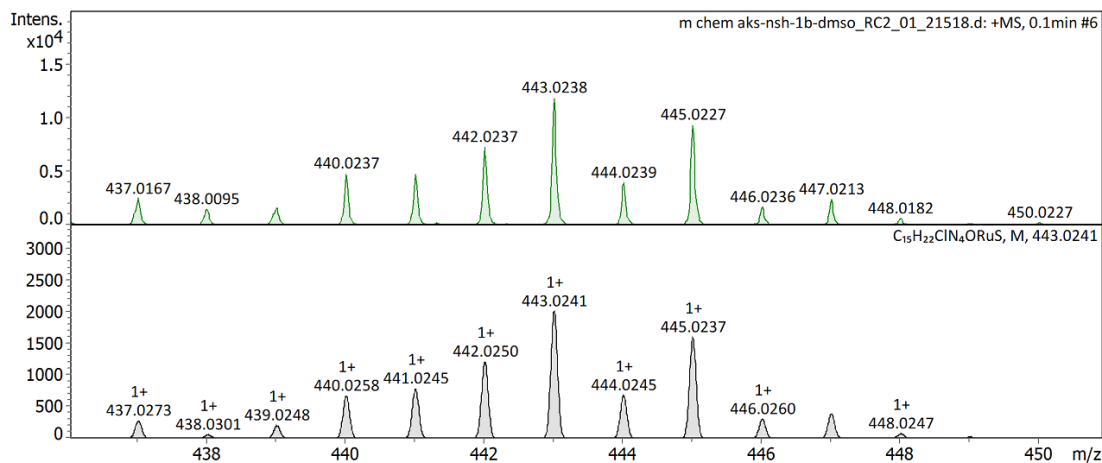

**Figure S7.** LCMS and HRMS of complex **2b**.

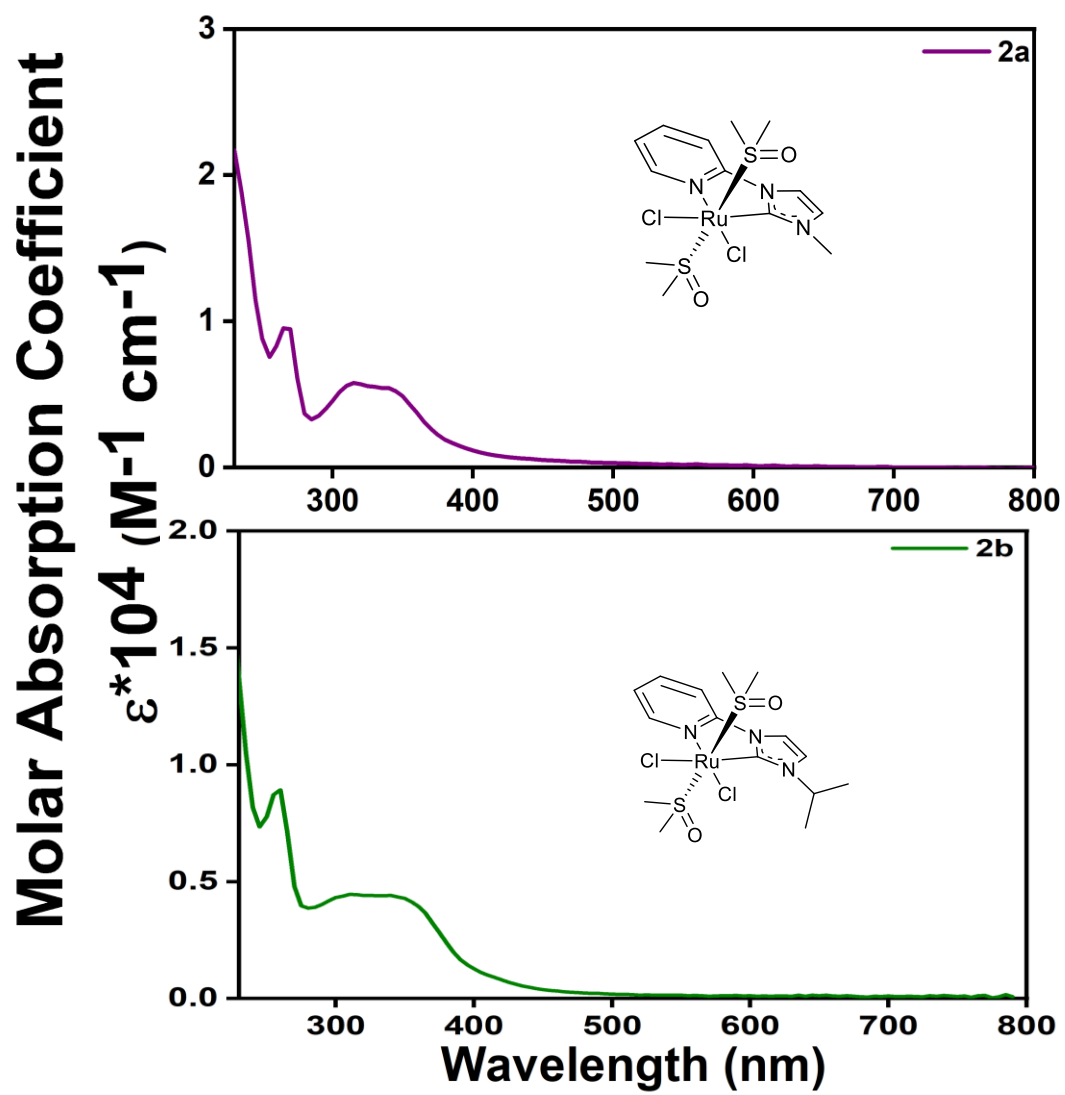

**Figure S8.** Stack plots of Molar absorption coefficients of complexes **2a** (up) and **2b** (down) recorded in DCM at room temperature.

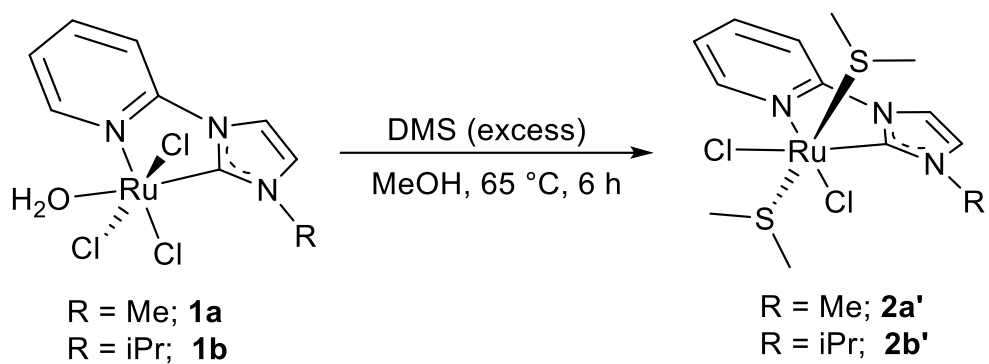

**Scheme S1.** Synthesis of Ru(II)-PyNHC-(DMS)<sub>2</sub> complexes **2a'** and **2b'** from Ru(III)-NHC complexes **1a** and **1b** respectively.

## Generic Display Report

### Analysis Info

Analysis Name C:\Users\user\Downloads\OneDrive\_2024-04-10\h chem AKS-NSH-2a-SMe.d  
 Method 7. L M.m  
 Sample Name  
 Comment

Acquisition Date 08-04-2024 13:24:37

Operator Ghanashyam Bhavsar  
 Instrument micrOTOF-Q

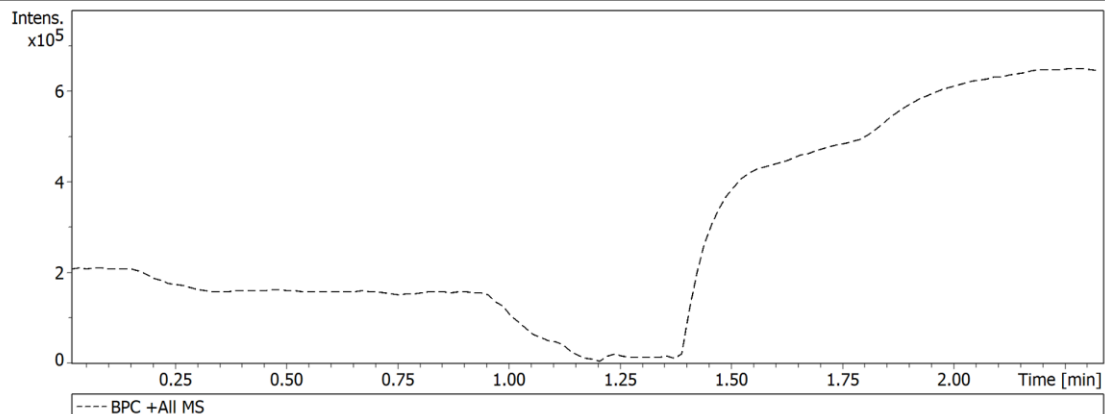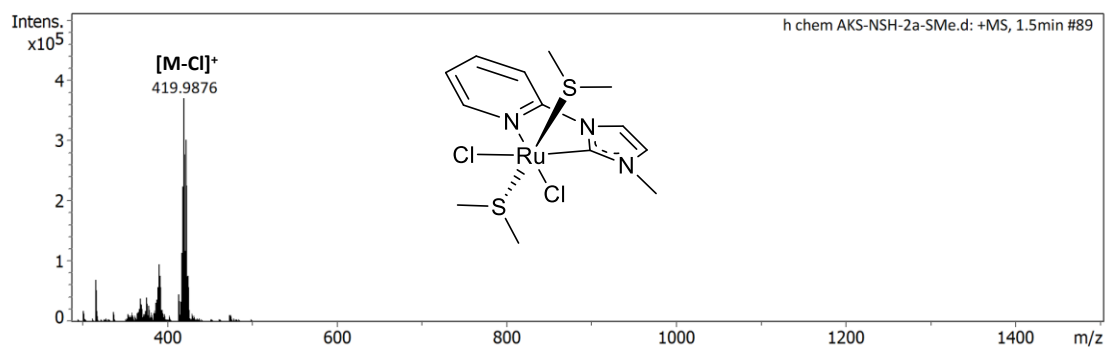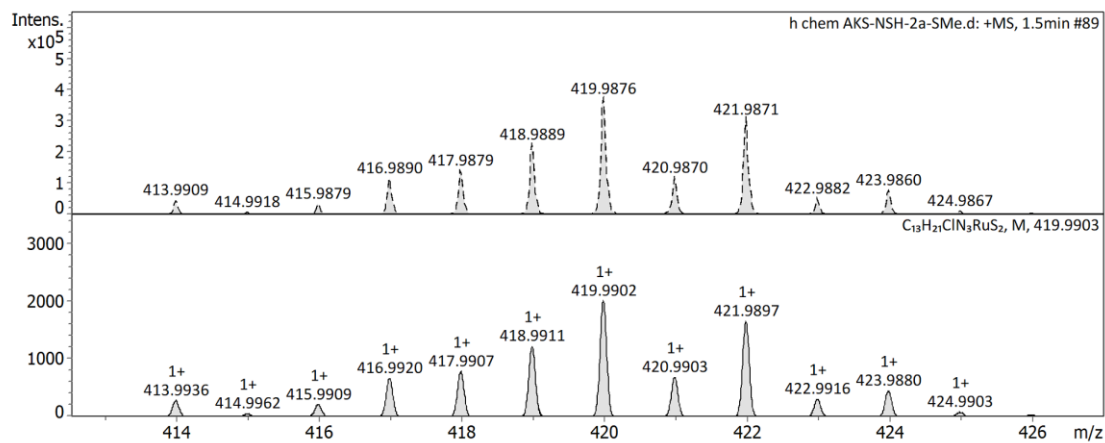

**Figure S9.** LCMS and HRMS of complex **2a'**.

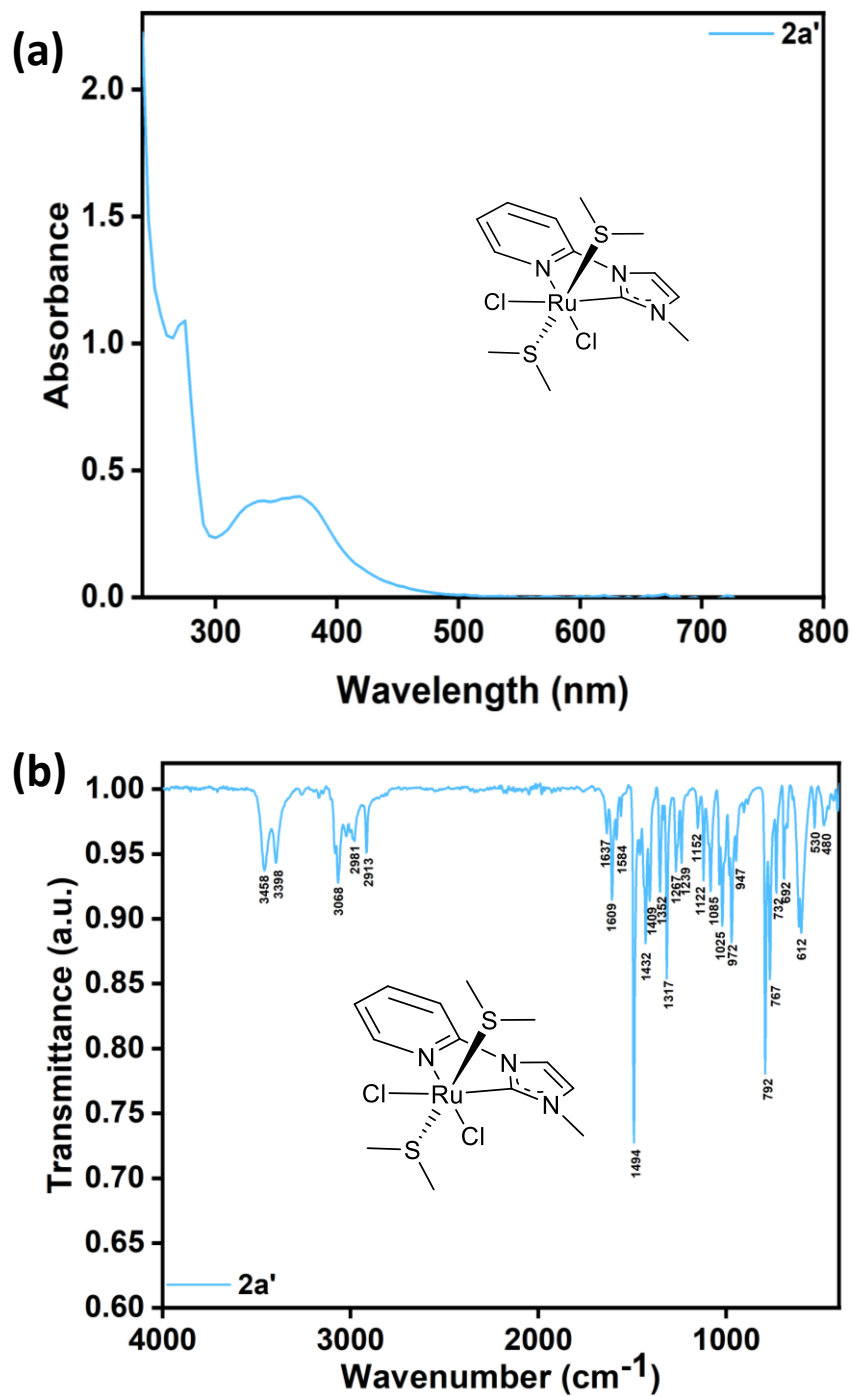

**Figure S10.** (a) UV-Vis spectrum of complex **2a'** recorded in MeOH at room temperature and (b) FT-IR spectrum of complex **2a'** recorded in solid state.

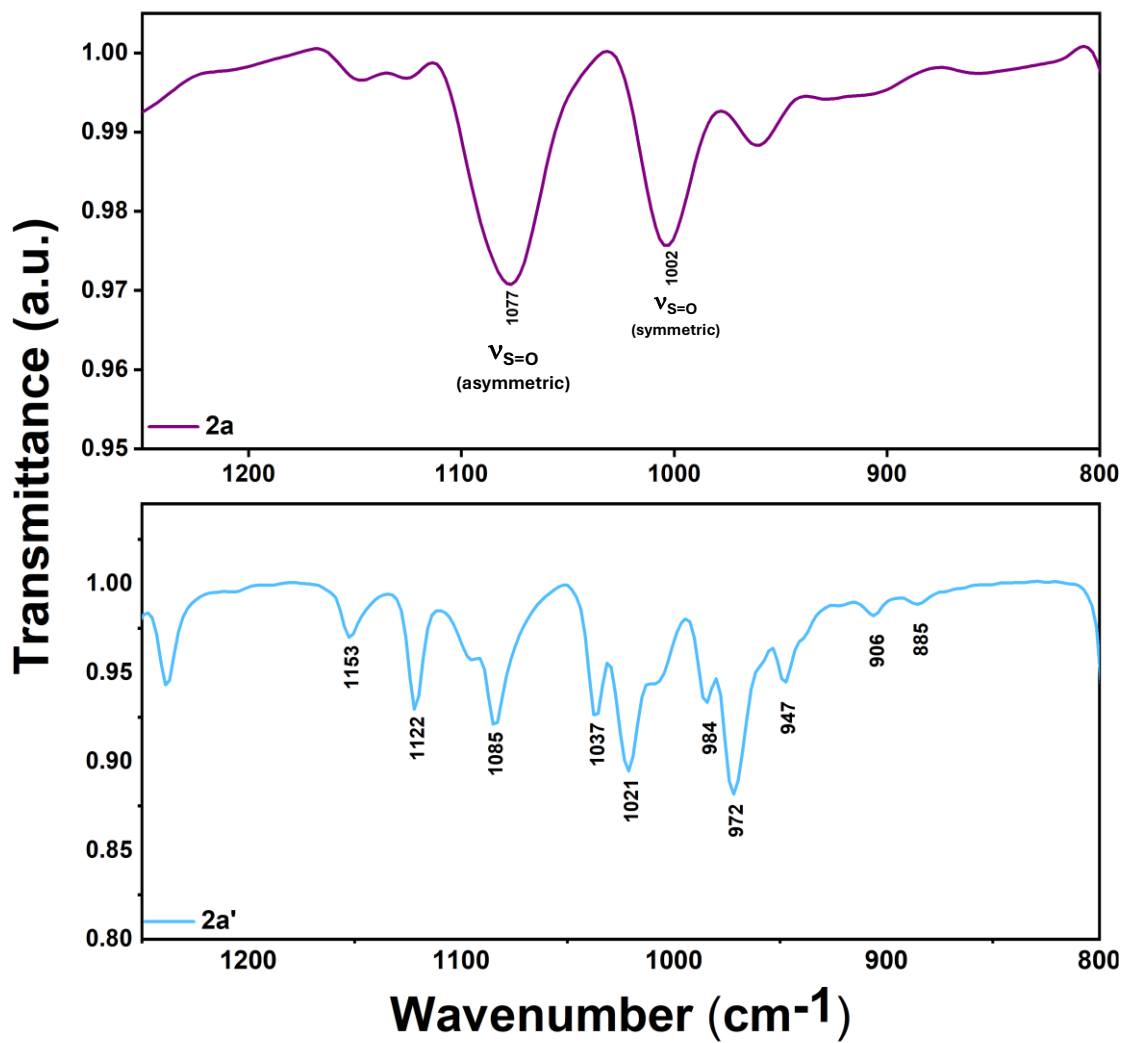

**Figure S11.** Comparative IR spectra of **2a** (up) and **2a'** (down) for the identification of IR bands for S=O in Ru-NHC-(DMSO)<sub>2</sub> complex.

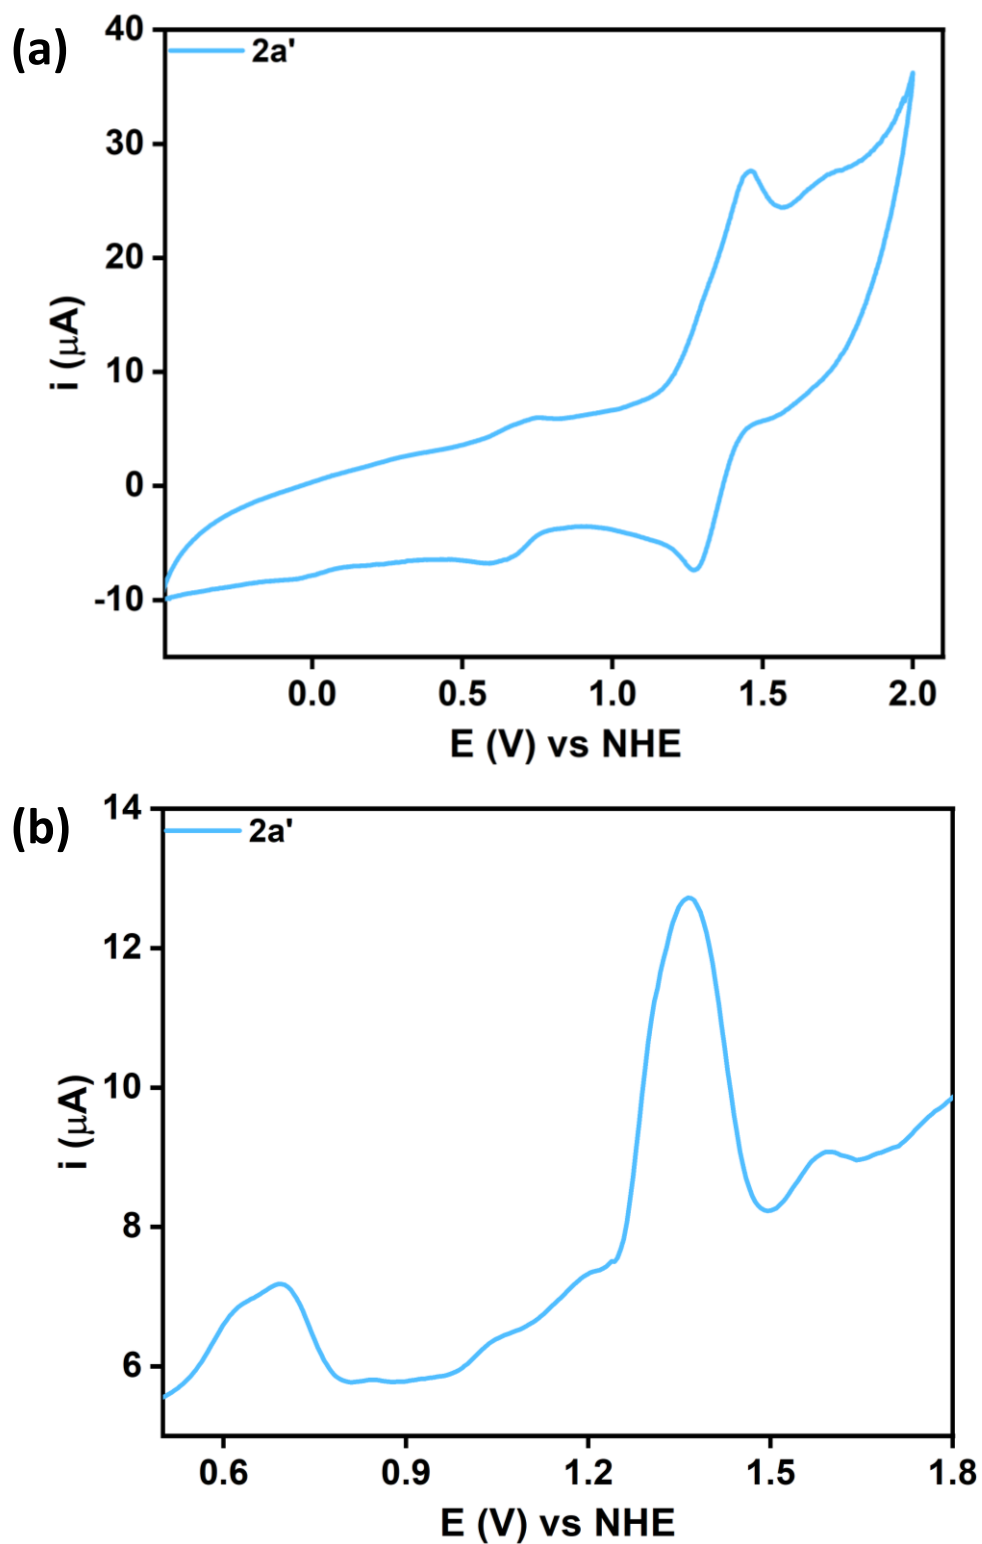

**Figure S12.** (a) Cyclic voltammogram and (b) DPV of complex **2a'** recorded in  $\text{CH}_2\text{Cl}_2$  using 0.1 M  $\text{NH}_4\text{PF}_6$  as the supporting electrolyte.



## Generic Display Report

### Analysis Info

|               |                                                                                  |                  |                     |
|---------------|----------------------------------------------------------------------------------|------------------|---------------------|
| Analysis Name | C:\Users\user\Downloads\OneDrive_1_4-10-2024\m chem aks-nsh-2b-sme_RB4_01_8479.d | Acquisition Date | 09-04-2024 16:38:54 |
| Method        | 7. L M.m                                                                         | Operator         | Ghanashyam Bhavsar  |
| Sample Name   | m chem aks-nsh-2b-sme                                                            | Instrument       | micrOTOF-Q          |
| Comment       |                                                                                  |                  |                     |

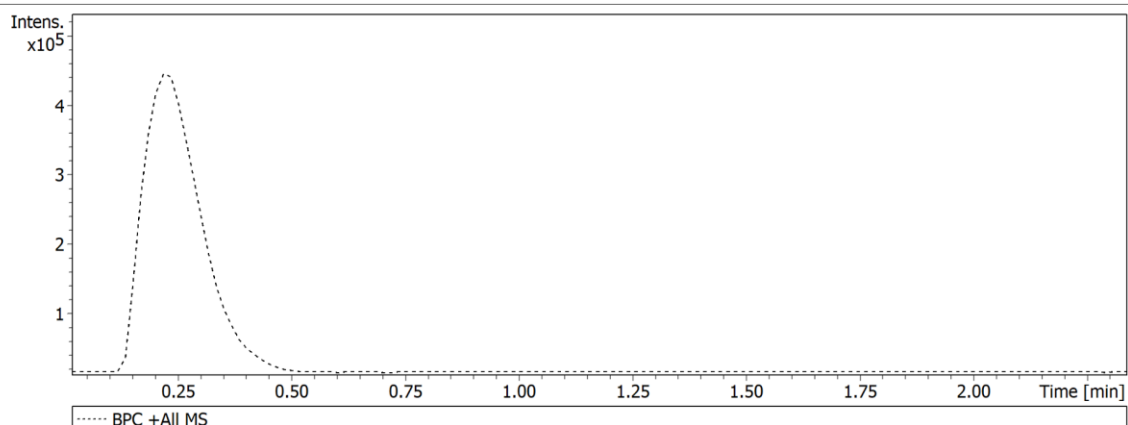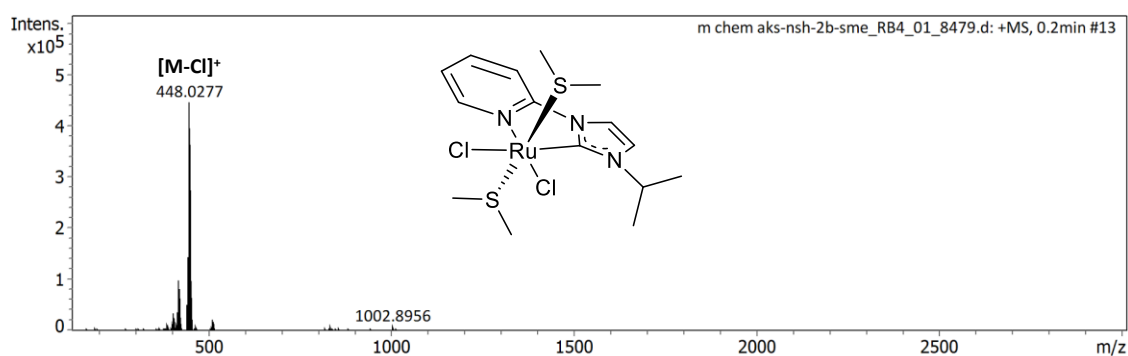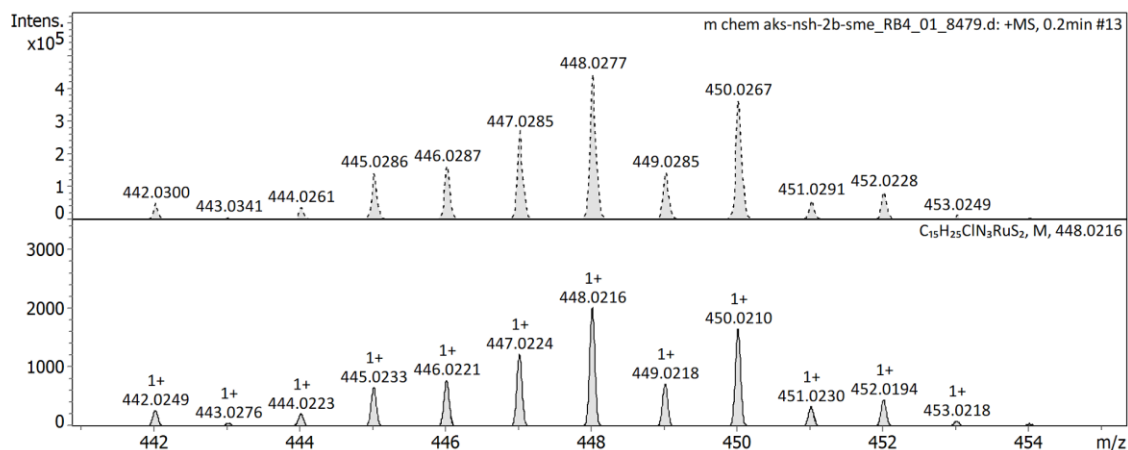

Figure S13. LCMS and HRMS of complex **2b'**.

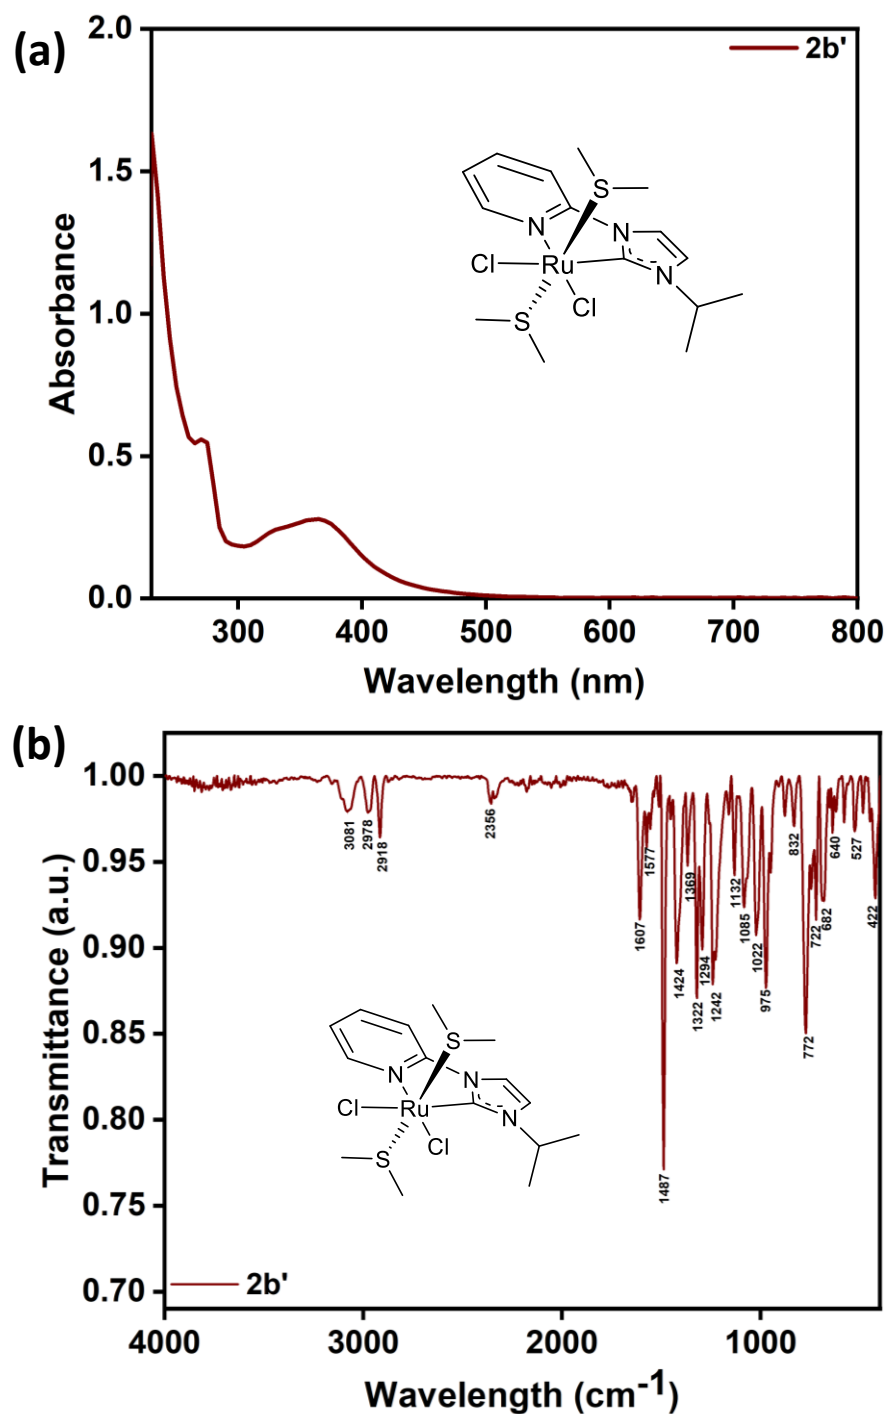

**Figure S14.** (a) UV-Vis spectrum of complex **2b'** recorded in MeOH at room temperature and (b) FT-IR spectrum of complex **2b'** recorded in solid state.

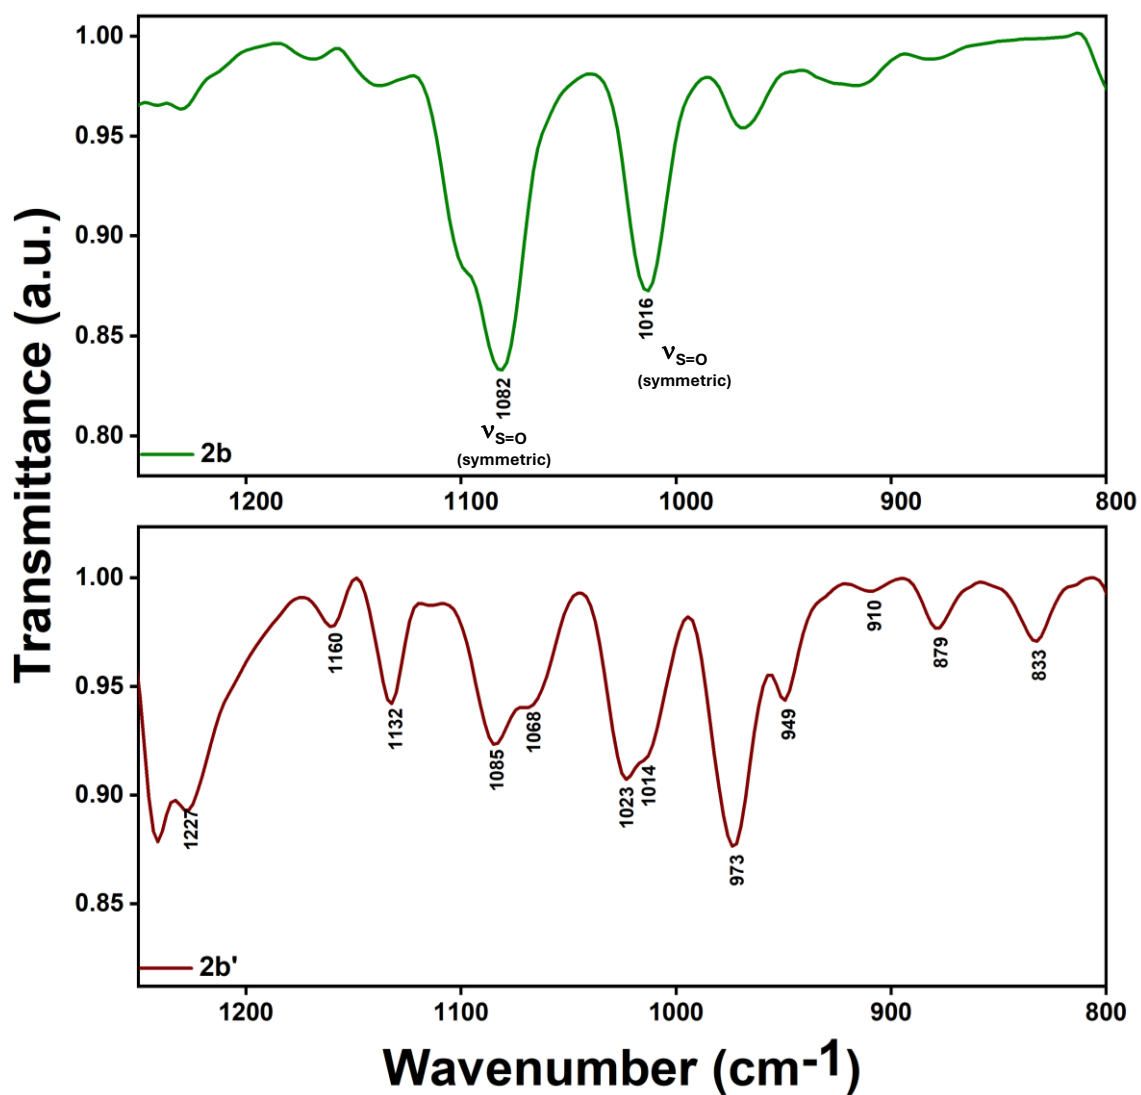

Figure S15. Comparative IR spectra of **2b** (up) and **2b'** (down) for the

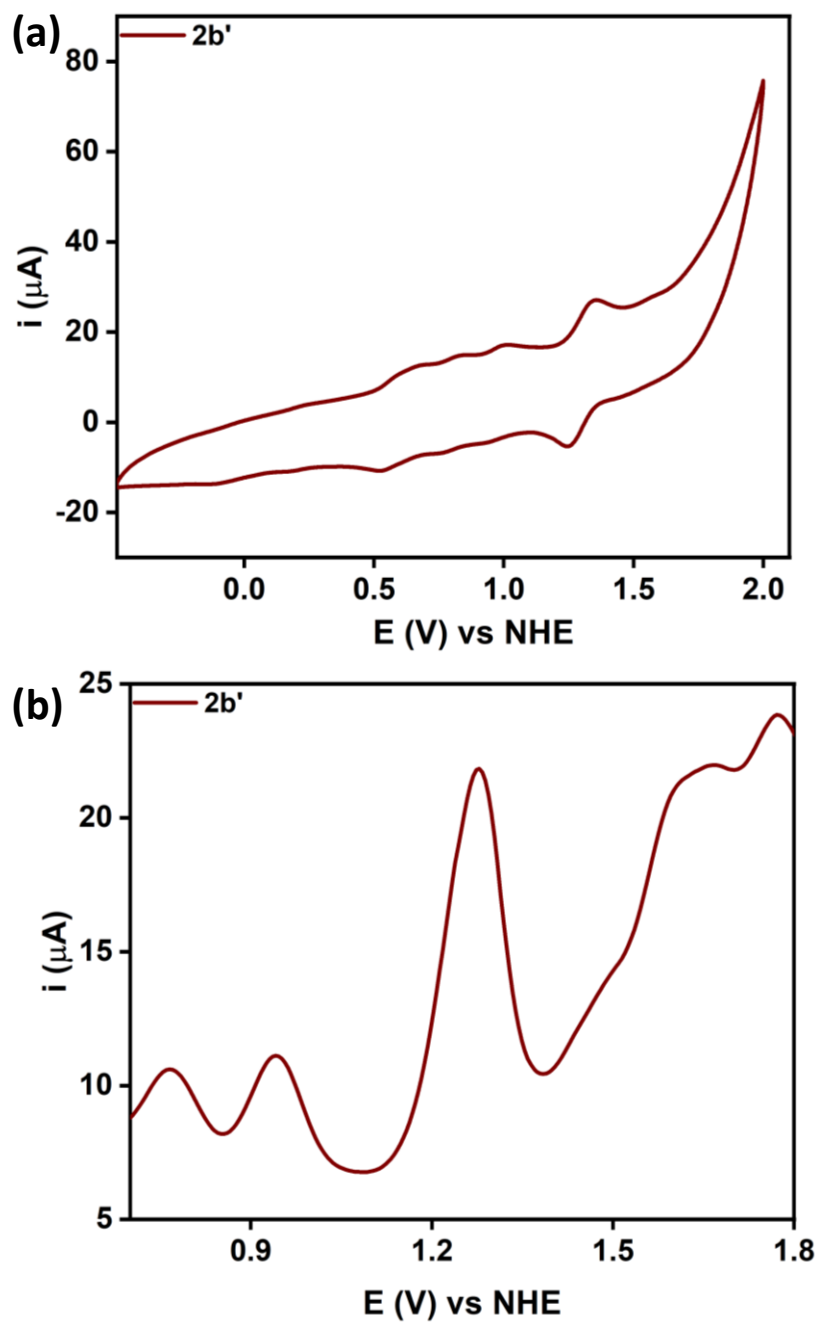

**Figure S16.** (a) Cyclic voltammogram and (b) DPV of complex **2b'** recorded in  $\text{CH}_2\text{Cl}_2$  using 0.1 M  $\text{NH}_4\text{PF}_6$  as the supporting electrolyte.

## Generic Display Report

|                      |                                                                        |                  |                     |
|----------------------|------------------------------------------------------------------------|------------------|---------------------|
| <b>Analysis Info</b> |                                                                        | Acquisition Date | 19-07-2023 13:43:47 |
| Analysis Name        | F:\Project 4\OneDrive_1_7-20-2023 (1)\h chem aks-nsh-522_BA6_01_1106.d | Operator         | Ghanashyam          |
| Method               | 8. LCMS tune wide MeOH.m                                               | Instrument       | micrOTOF-Q          |
| Sample Name          | h chem aks-nsh-522                                                     |                  |                     |
| Comment              |                                                                        |                  |                     |

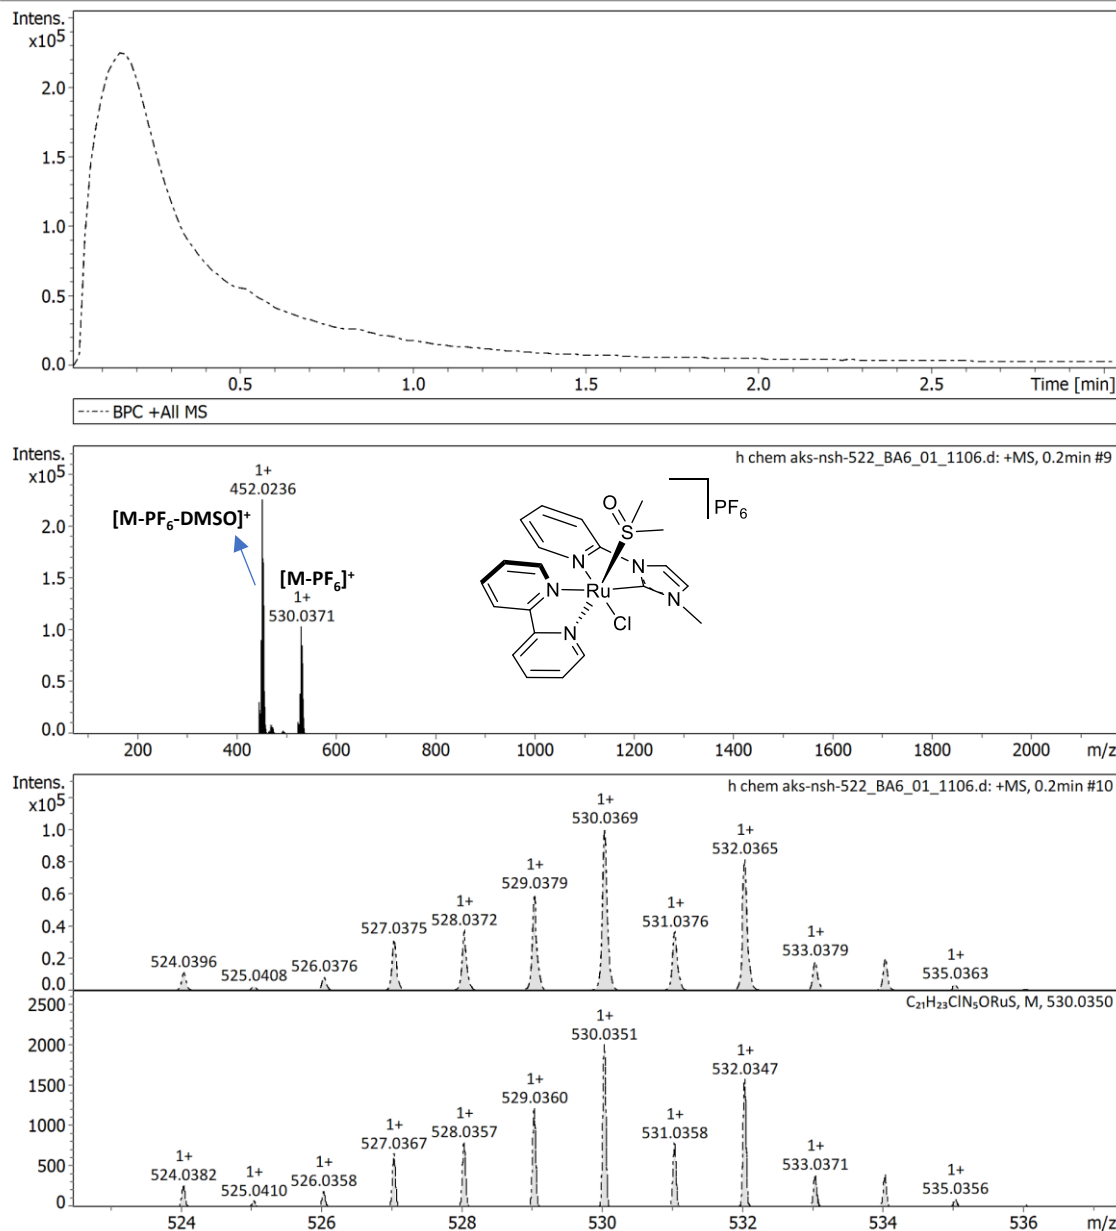

**Figure S17.** LCMS and HRMS of complex **3a**.

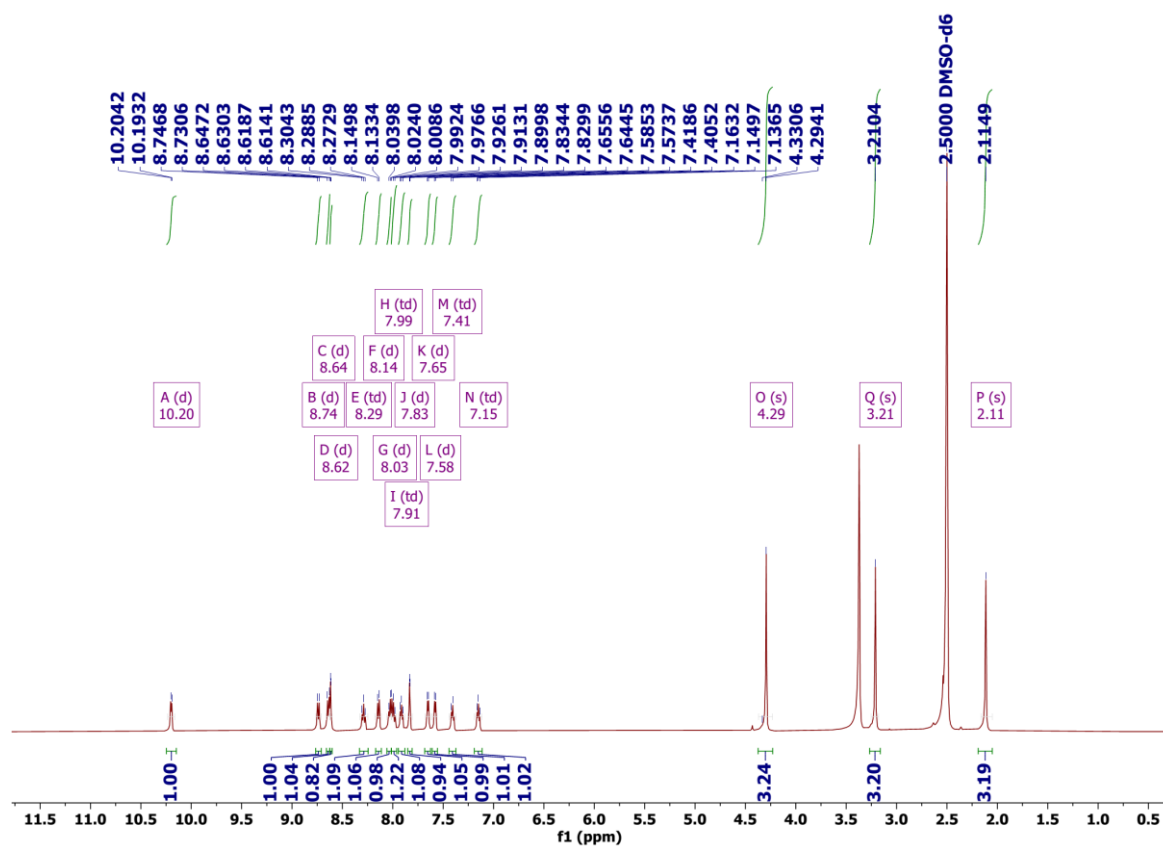

Figure S18.  $^1\text{H}$  NMR of complex **3a** recorded in DMSO- $\text{d}_6$ .

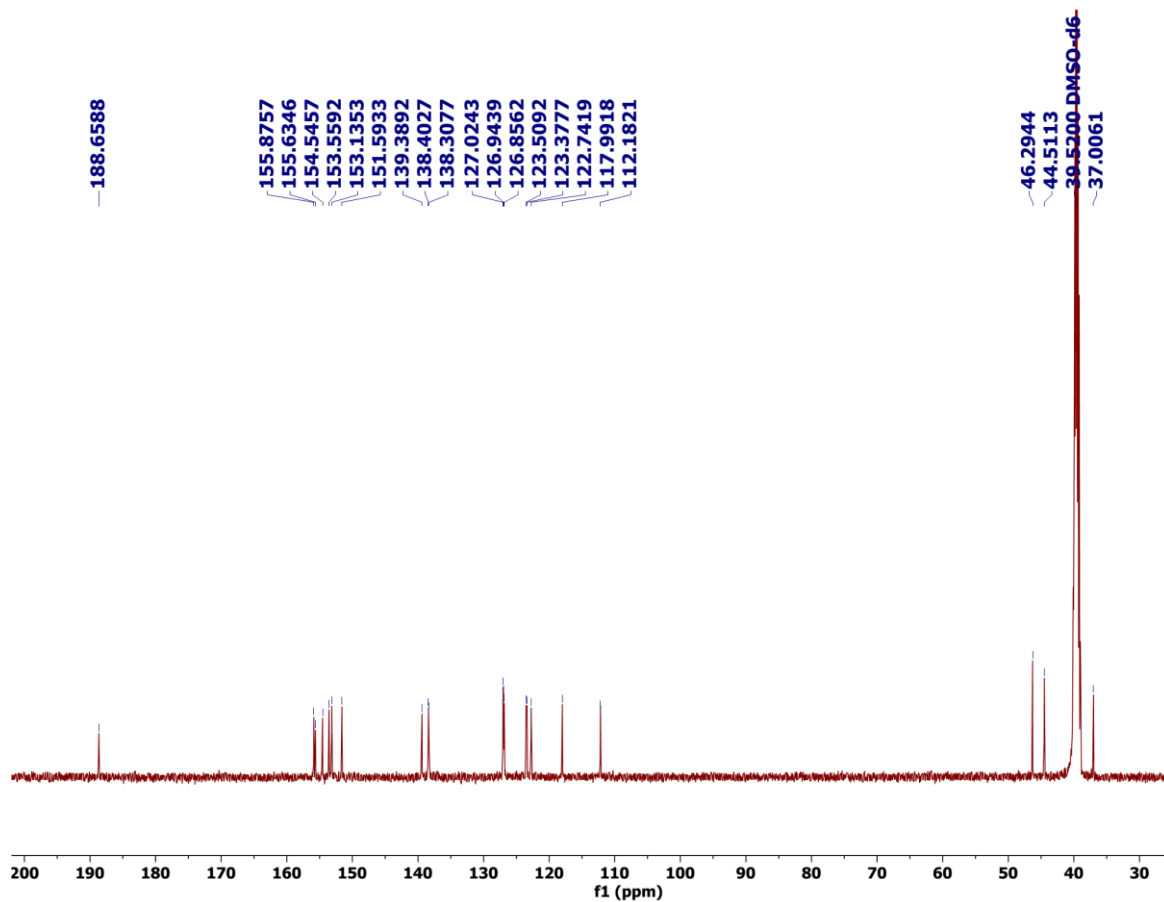

Figure S19.  $^{13}\text{C}$  NMR of complex **3a** recorded in DMSO- $\text{d}_6$ .

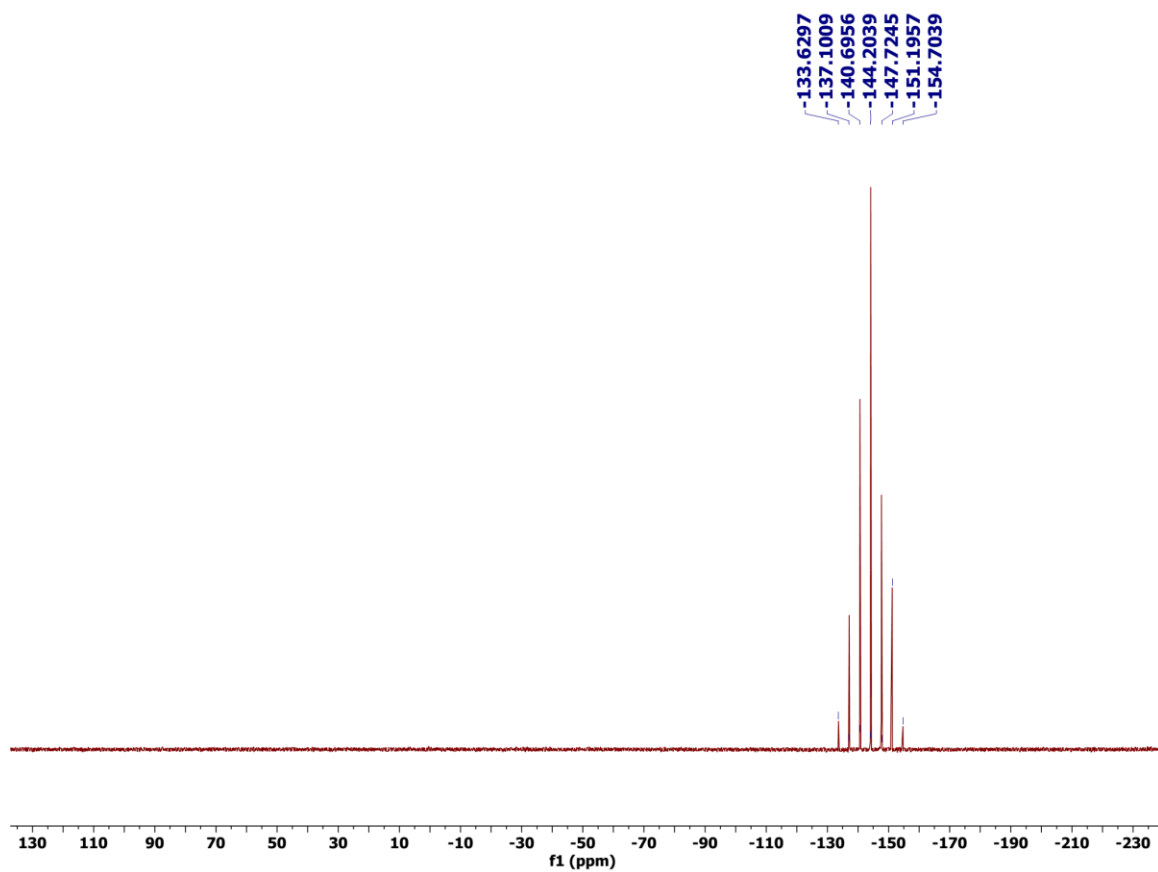

**Figure S20.**  $^{31}\text{P}$  NMR of complex **3a** recorded in  $\text{DMSO-d}_6$ .



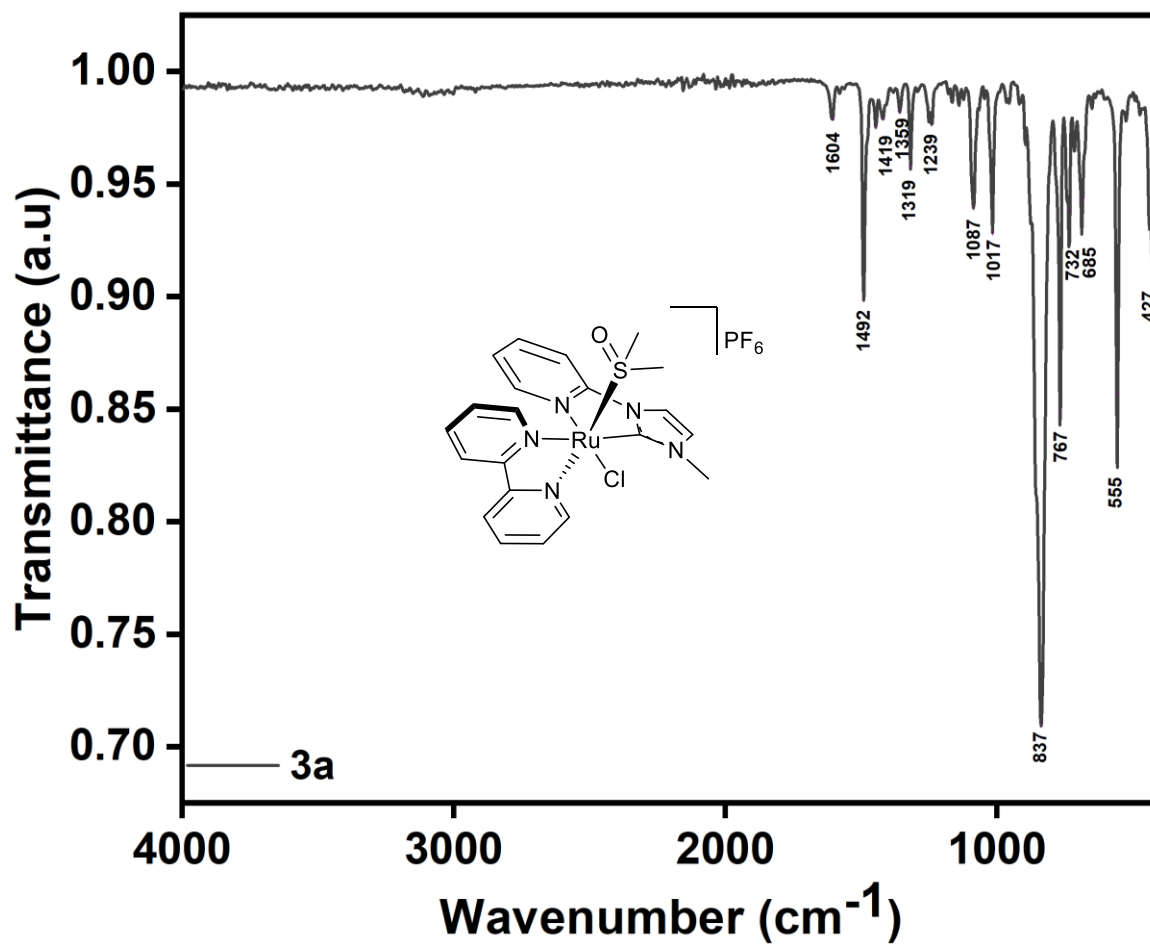

Figure S21. IR spectrum of complex **3a** in solid state.

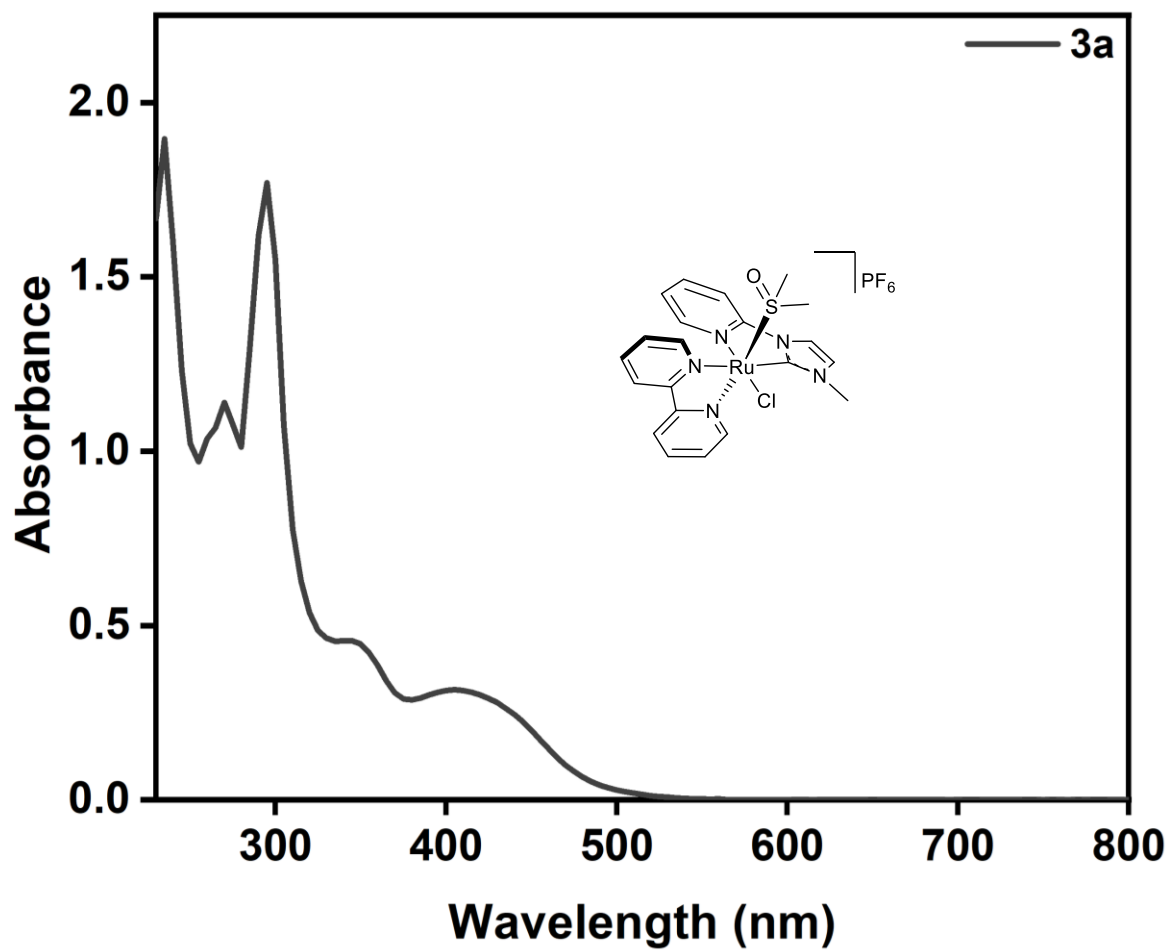

**Figure S22.** UV-Vis spectrum of complex **3a** recorded in MeOH at room temperature.

### Description of crystal structure of **3a**

The X-ray quality crystals of complex **3a** have been obtained by the slow diffusion of diethyl ether into the methanolic solution of the complex at 4 °C. The complex **3a** is crystallized in triclinic crystal system with the space group *P*-1. Asymmetric crystal lattice contains two molecules of the complex. The coordination sphere consists of the bidentate ligand scaffold, N^N cyclometalated 2,2'-bipyridine, one DMSO and one chloride ligand arranged in a pseudo-octahedral fashion. The bite angle for the N1-Ru1-C1 was found be 78.2(5) ° which is slightly smaller than the bite angle observed in **2a**, however falls in the range reported for the Ru(II)-NHC complexes. The Ru1-C1 (2.009 Å) bond distance reveals close similarity with the complexes reported in literature. Furthermore, it is interesting to note that the shortening of the Ru1-S1 bond distance from 2.3021(18)Å (in **2a**) to 2.269(3)Å (in **3a**) can be attributed to the better  $\sigma$ -donor and  $\pi$ -acceptor properties of the bpy ligand compared to the  $\pi$ -donor chloride ligand in **2a**. Moreover, the slight hydrogen bonding interaction between O<sub>DMSO</sub>...H<sub>py</sub> trans to carbene was observed, which might have restricted the Ru-S single bond rotation. It is concomitant with the two different resonances observed in <sup>1</sup>H and <sup>13</sup>C NMR data for the two distinct -CH<sub>3</sub> groups of the DMSO ligand. All other bond distances and bond angles were found to be in accordance with the literature reports and listed in table S3-S4.

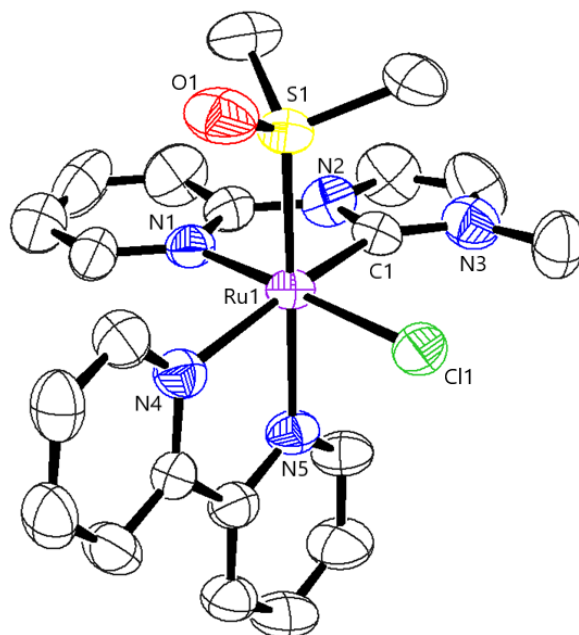

**Figure S23.** ORTEP diagrams for complex **3a** obtained from X-ray diffraction. Hydrogen atoms and counterion ( $\text{PF}_6^-$ ) are excluded for clarity. Ellipsoids are shown at the 50% probability level. Selected bond distances(Å) and bond angles(°) are Ru1-C1 2.009(12); Ru1-N1 2.064(10); Ru1-S1 2.269(3); Ru1-Cl1 2.418(3); Ru1-N4 2.150(11); Ru1-N5 2.108(10); C1-Ru1-N1 78.2(5); and C1-Ru1-N4 168.7(4).

## Generic Display Report

### Analysis Info

|               |                                                                     |                  |                     |
|---------------|---------------------------------------------------------------------|------------------|---------------------|
| Analysis Name | F:\Project 4\OneDrive_2023-09-08\h chem aks-nsh-1b-db_RD1_01_2618.d | Acquisition Date | 08-09-2023 16:55:18 |
| Method        | 8. LCMS tune wide MeOH.m                                            | Operator         | Ghanashyam          |
| Sample Name   | h chem aks-nsh-1b-db                                                | Instrument       | micrOTOF-Q          |
| Comment       |                                                                     |                  |                     |

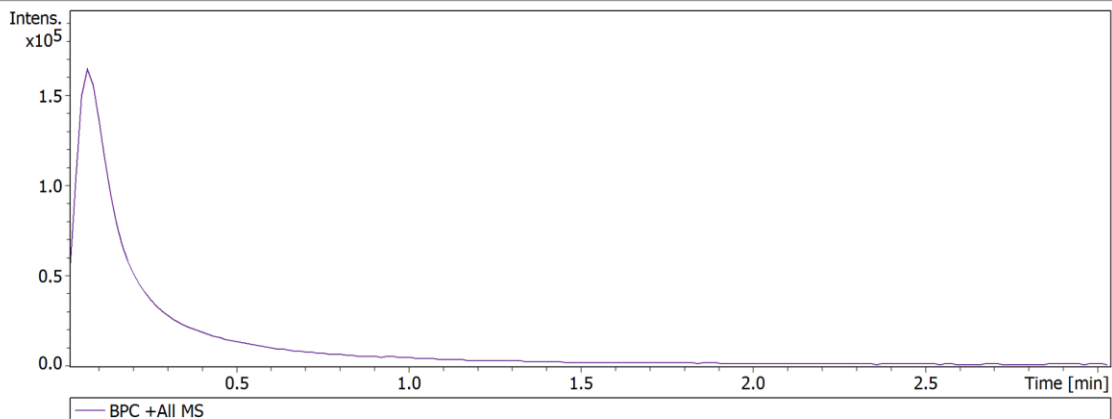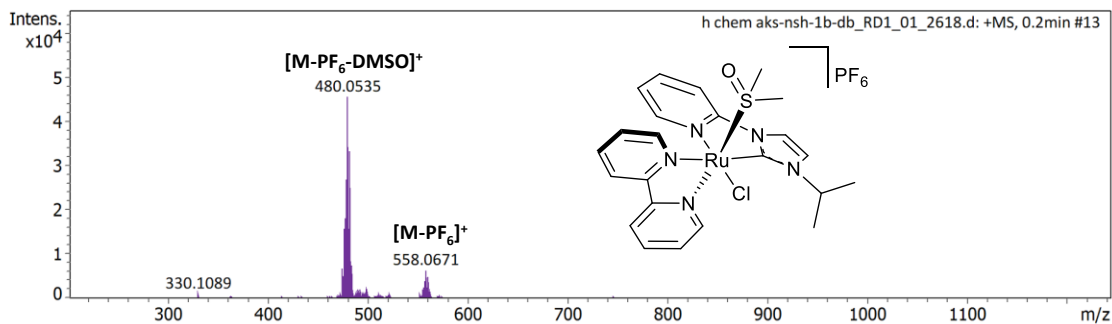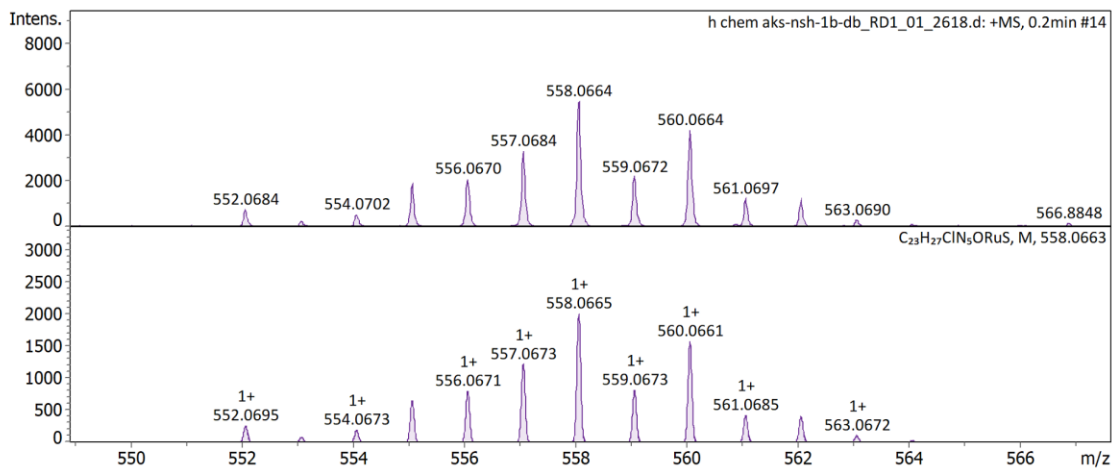

Figure S24. LCMS and HRMS of complex **3b**.

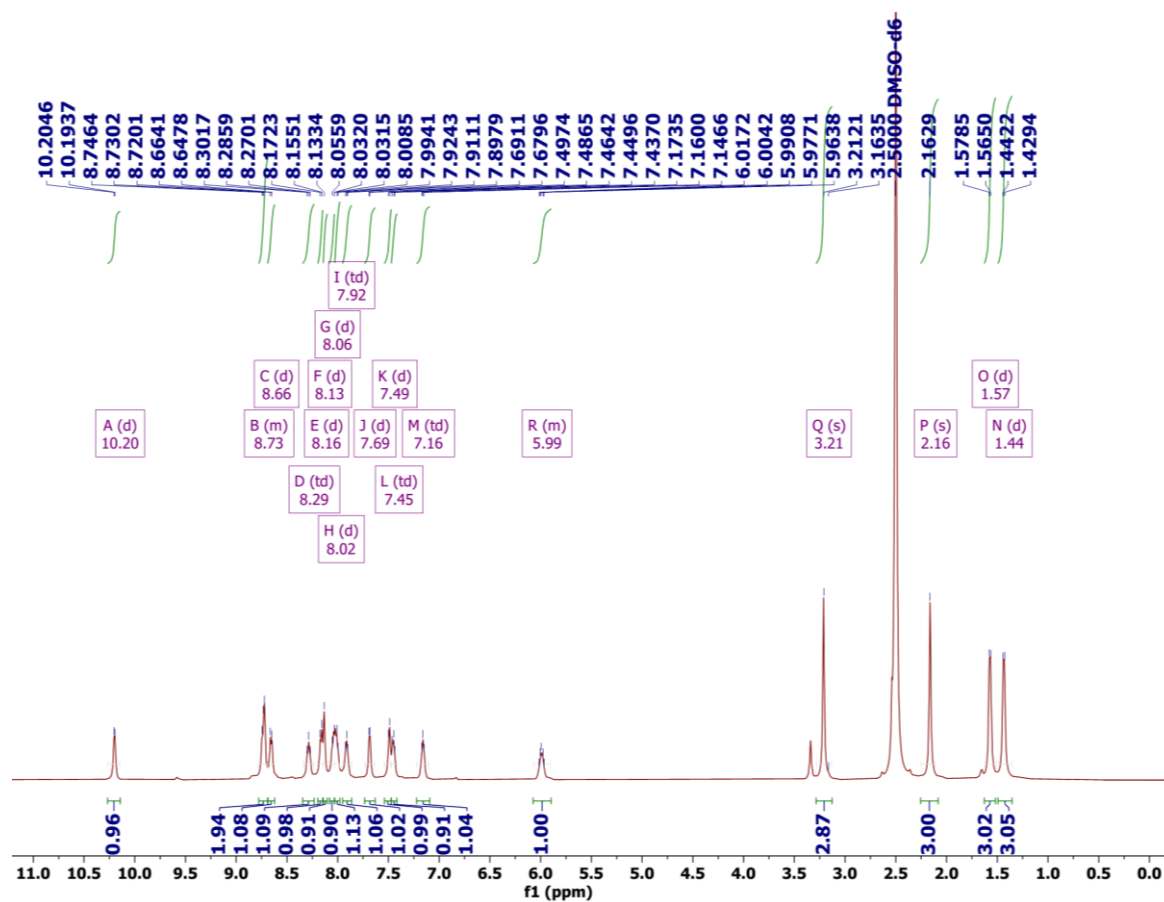

Figure S25.  $^1\text{H}$  NMR of complex **3b** recorded in DMSO- $d_6$ .

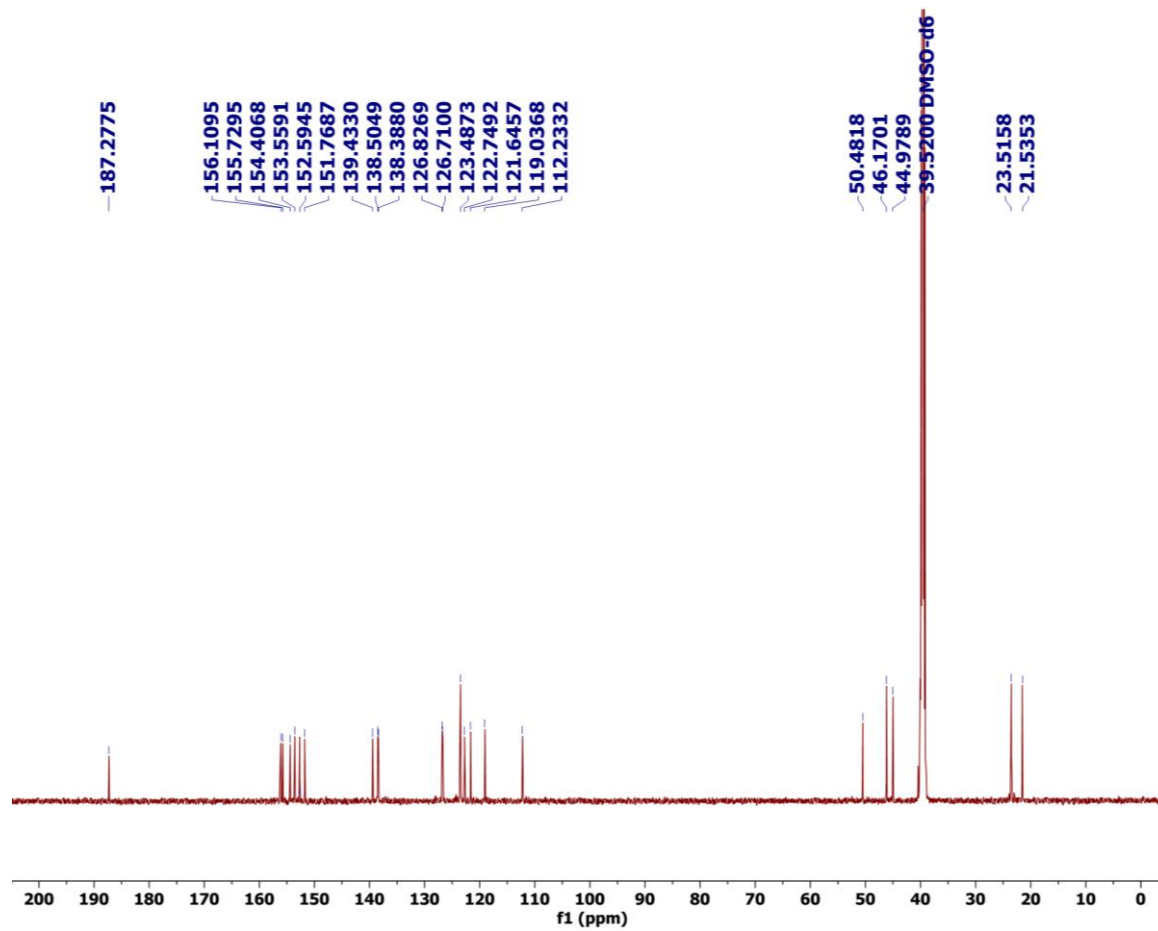

**Figure S26.** <sup>13</sup>C NMR of complex **3b** recorded in DMSO-d<sub>6</sub>.

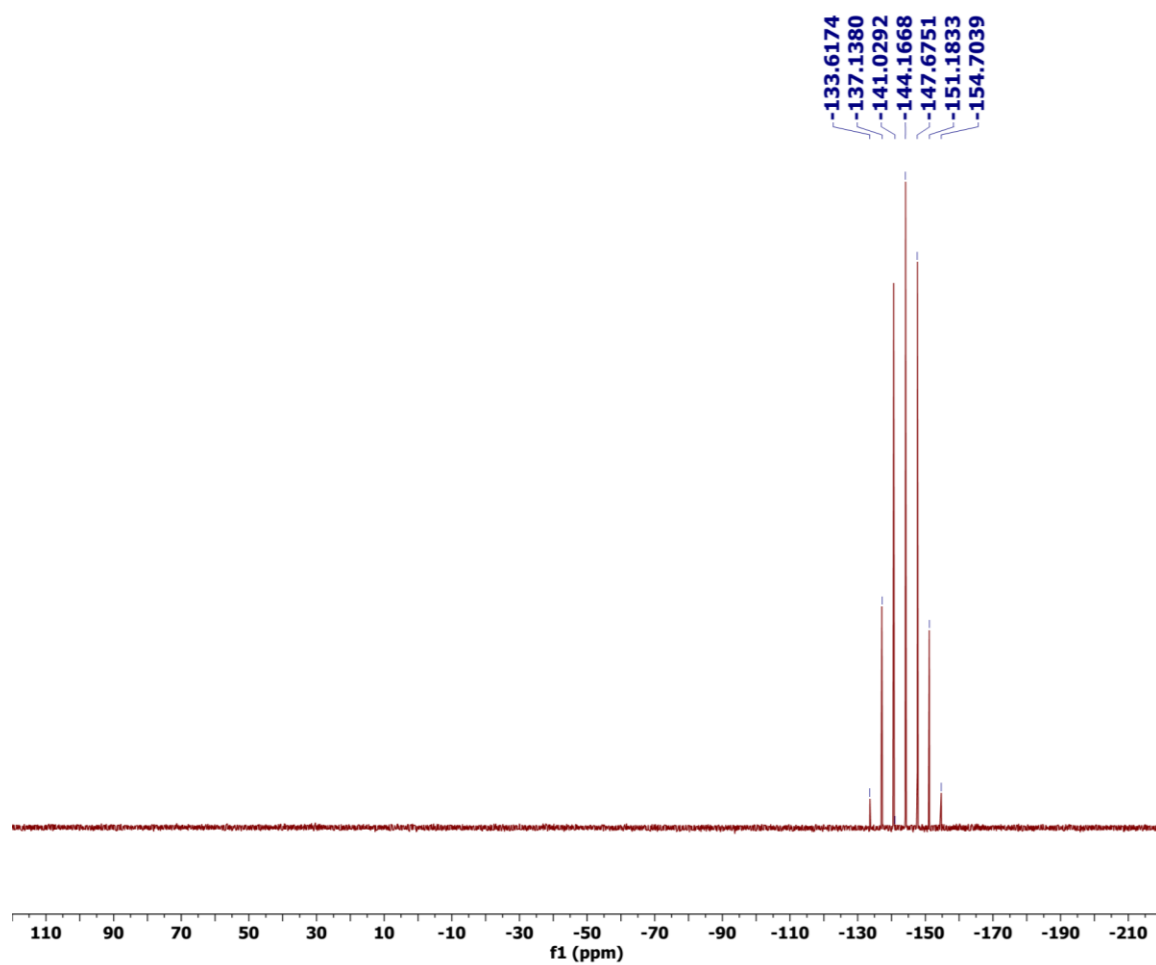

**Figure S27.**  $^{31}\text{P}$  NMR of complex **3b** recorded in  $\text{DMSO-d}_6$ .

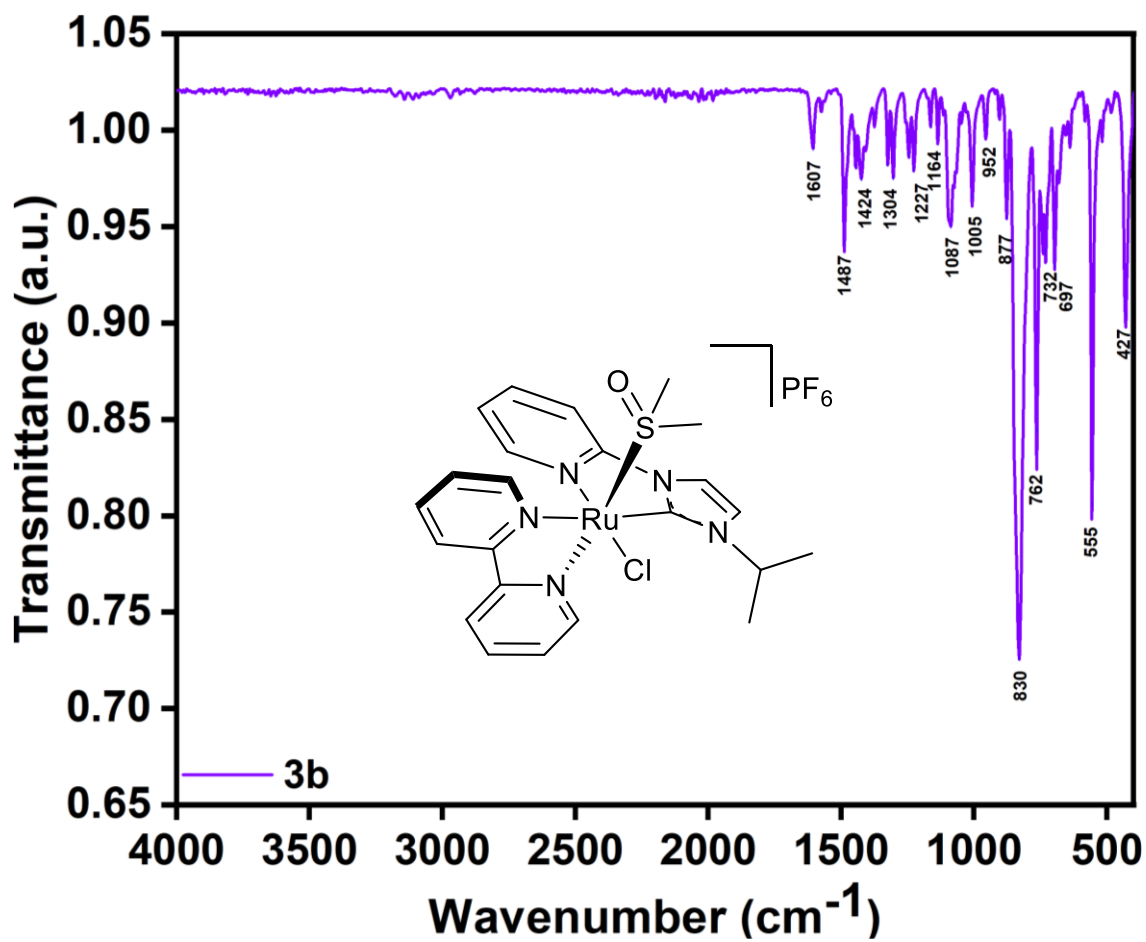

Figure S28. IR spectrum of complex **3b** in solid state.



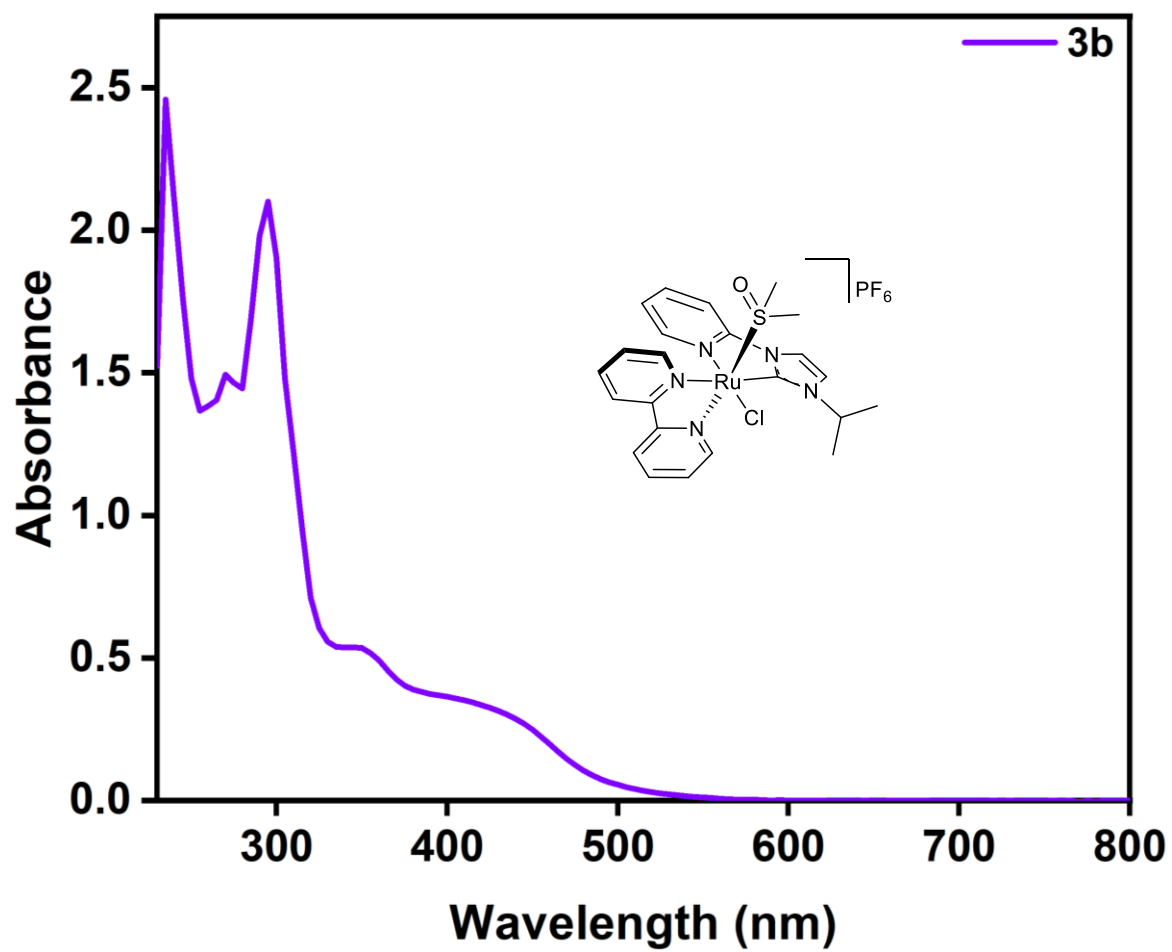

**Figure S29.** UV-Vis spectrum of complex **3b** recorded in MeOH at room temperature.

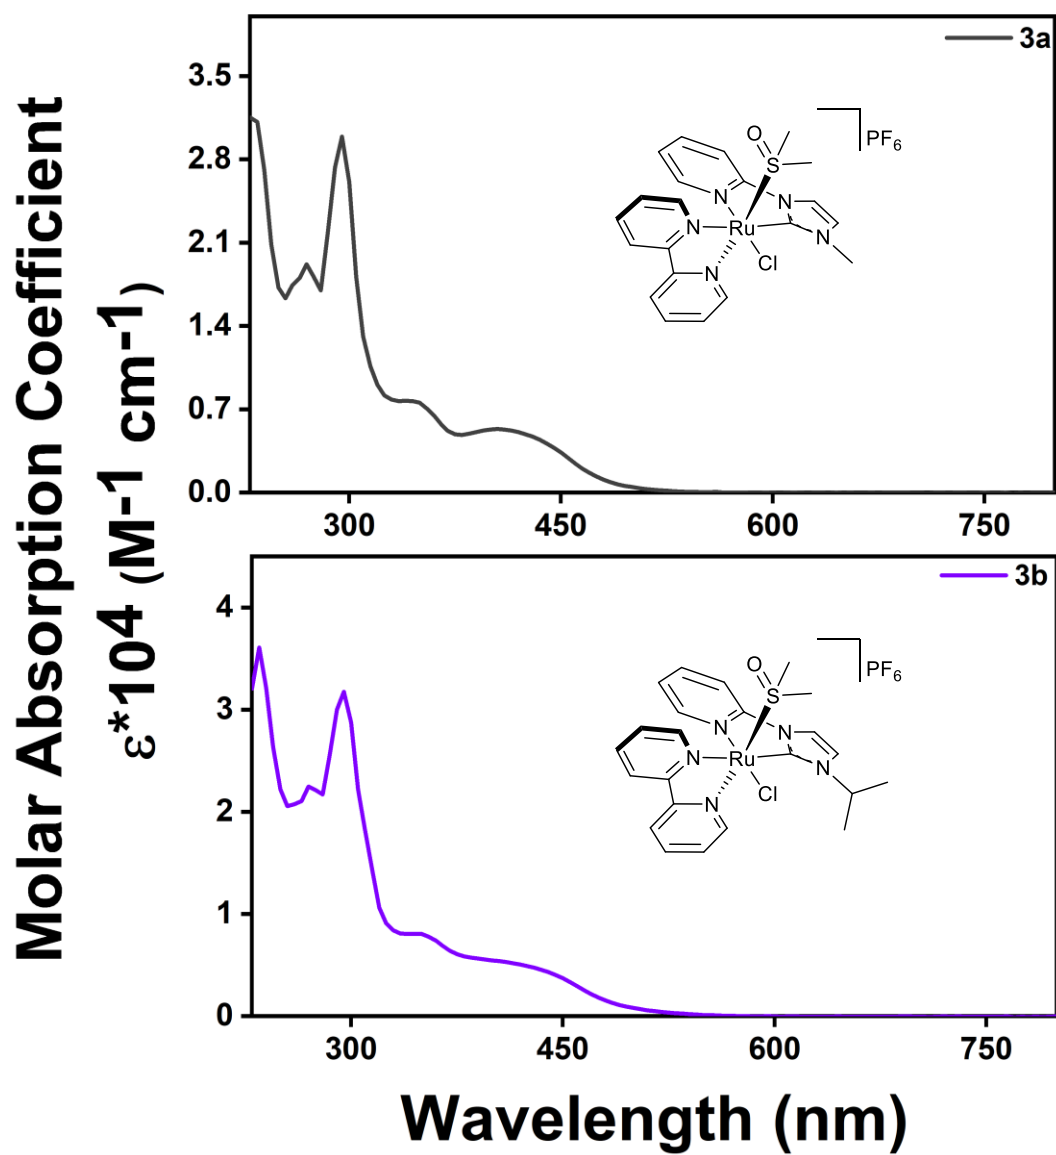

**Figure S30.** Stack plots of Molar absorption coefficients of complexes **3a** (up) and **3b** (down) recorded in DCM at room temperature.

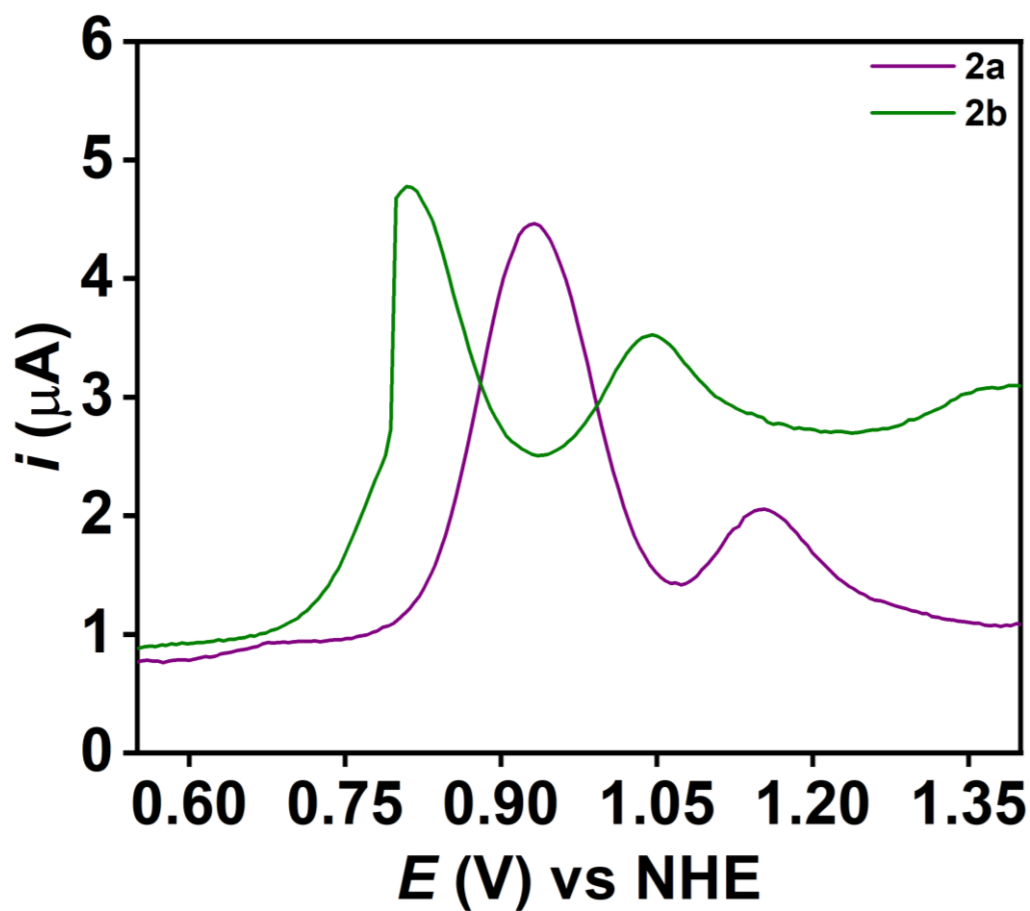

**Figure S31.** Differential pulse voltammetry of complexes **2a** and **2b** recorded in  $\text{CH}_2\text{Cl}_2$  using 0.1 M TBAH as the supporting electrolyte.

**Table S1. Mathematical formulae used for the calculation of the equilibrium (K) and rate (k) constants.**

**Mathematical equations**

$$\frac{i_{c1}}{i_{c2}} = a \cdot \frac{1}{v} + K_{O-S}^{III} \quad (1)$$

$$\sqrt{v} = \frac{1}{\frac{0.471}{K_{O-S}^{III}} \cdot \sqrt{\frac{nFl}{RT}}} \cdot \frac{i_d}{i_k} - \frac{1.02}{\frac{0.471}{K_{O-S}^{III}} \cdot \sqrt{\frac{nFl}{RT}}} \quad (2)$$

$$K^{II} = K^{III} + e^{\frac{F}{RT}(E_{Ru-S}^0 - E_{Ru-0}^0)} \quad (3)$$

$$\ln\left(\frac{i_{a1}}{\sqrt{v}}\right) = k_{\{O-S\}}^{II} \cdot \frac{1}{v} + b \quad (4)$$

where,  $i_c$  = cathodic peak intensity (A),  $a = RT/nF$ , with:  $R$  = Boltzmann constant (J/(K·mol))  $T$  = temperature (K)  $n$  = number of exchanged electrons  $F$  = Faraday constant (A·s/mol)  $v$  = scan rate (V/s),  $K$  = equilibrium constant,  $i_a$  = diffusional current in the absence of a chemical reaction (=  $i_{a1}$ )  $i_k$  = measured peak current (=  $i_{c1}$ ),  $l = k_{O-S}^{III} + k_{S-O}^{III}$ ,  $E^\circ$  = standard potential.

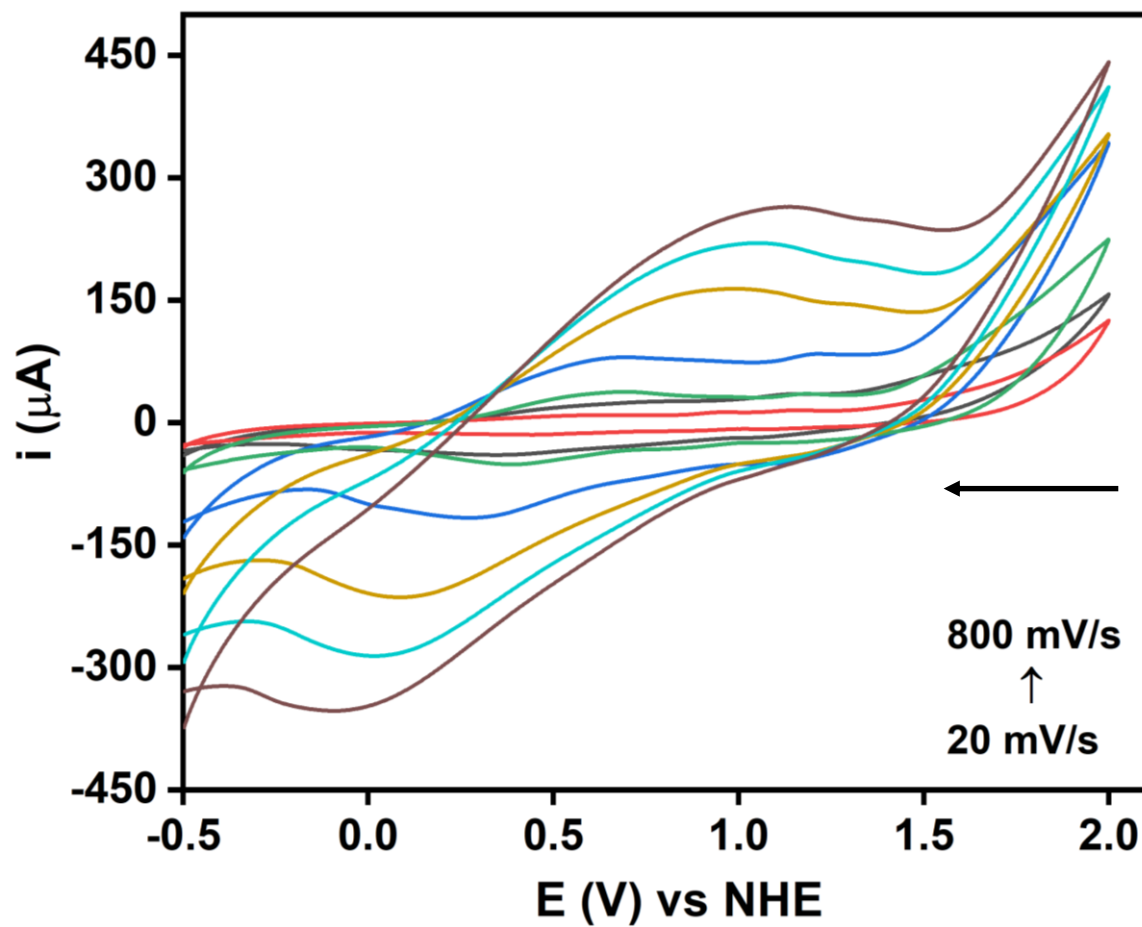

**Figure S32.** Cyclic voltammograms of **2a** in 0.1 M TBAH,  $\text{CH}_2\text{Cl}_2$ , at scan rates between 20 mV/s to 800 mV/s, after applying the CPE for 5 minutes at 2 V. Arrow indicates the starting potential and scanning direction.

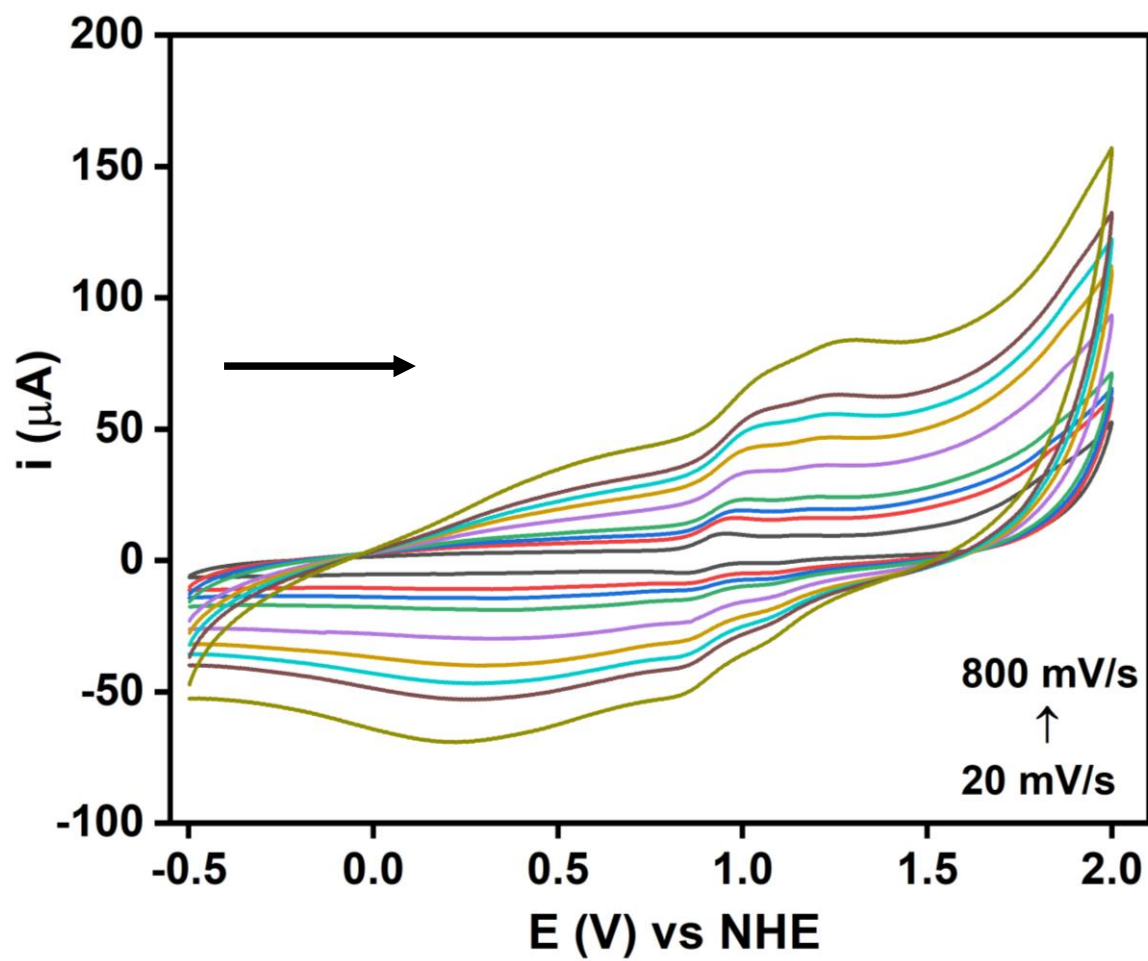

**Figure S33.** Cyclic voltammograms of **2a** in 0.1 M TBAH,  $\text{CH}_2\text{Cl}_2$ , at scan rates between 20 mV/s to 800 mV/s, after applying the CPE for 5 minutes at -0.5 V. Arrow indicates the starting potential and scanning direction.

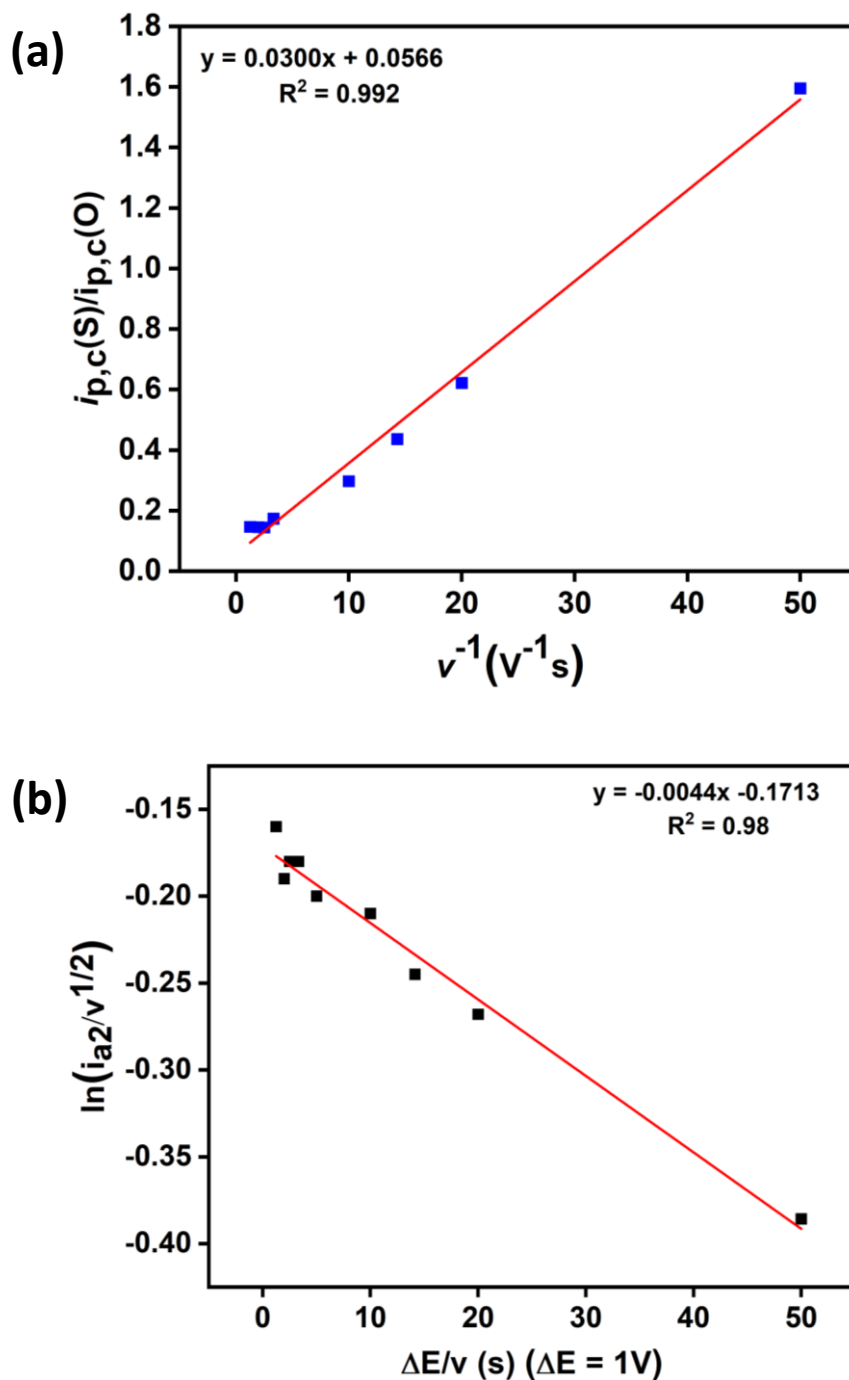

**Figure S34.** Plots of (a)  $i_{c1}/i_{c2}$  vs. inverse of the scan rate to obtain  $K^{III}_{O \rightarrow S}$  and (b)  $\ln(i_{a2}/\sqrt{v})$  vs. inverse of the scan rate to obtain  $k^{II}_{O \rightarrow S}$  for S-O linkage isomerization in complex **2a**.

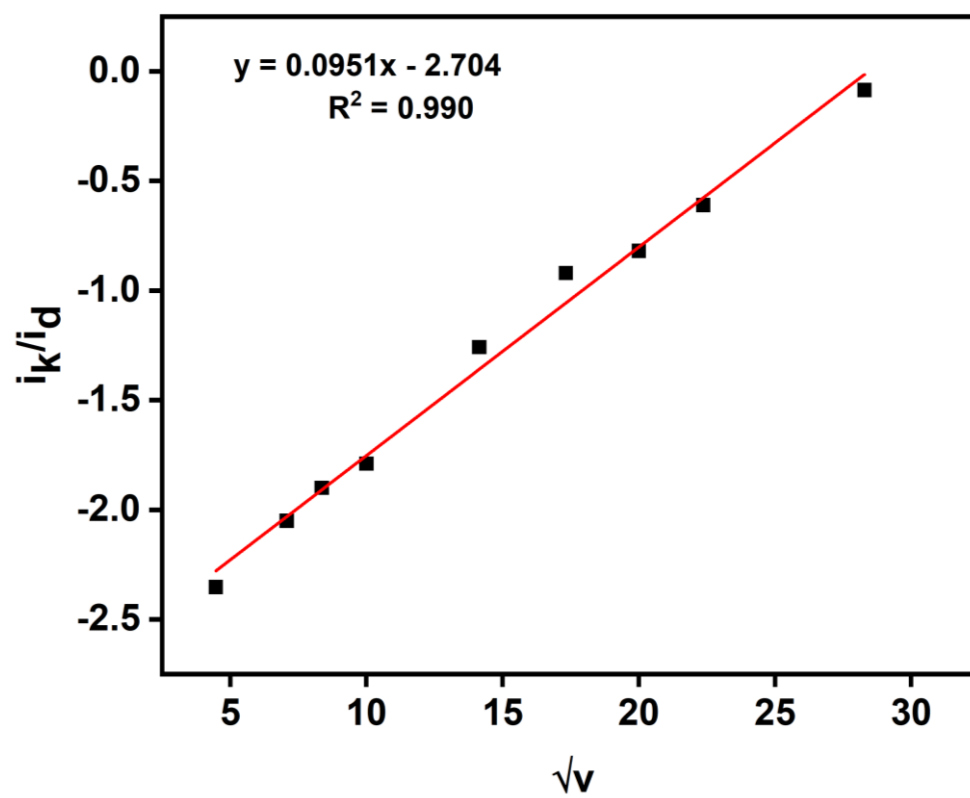

**Figure S35.** Plot of  $i_k/i_d$  vs.  $\sqrt{v}$  to obtain  $k_{S \rightarrow O}^{III}$  and  $k_{O \rightarrow S}^{III}$  for complex **2a**.



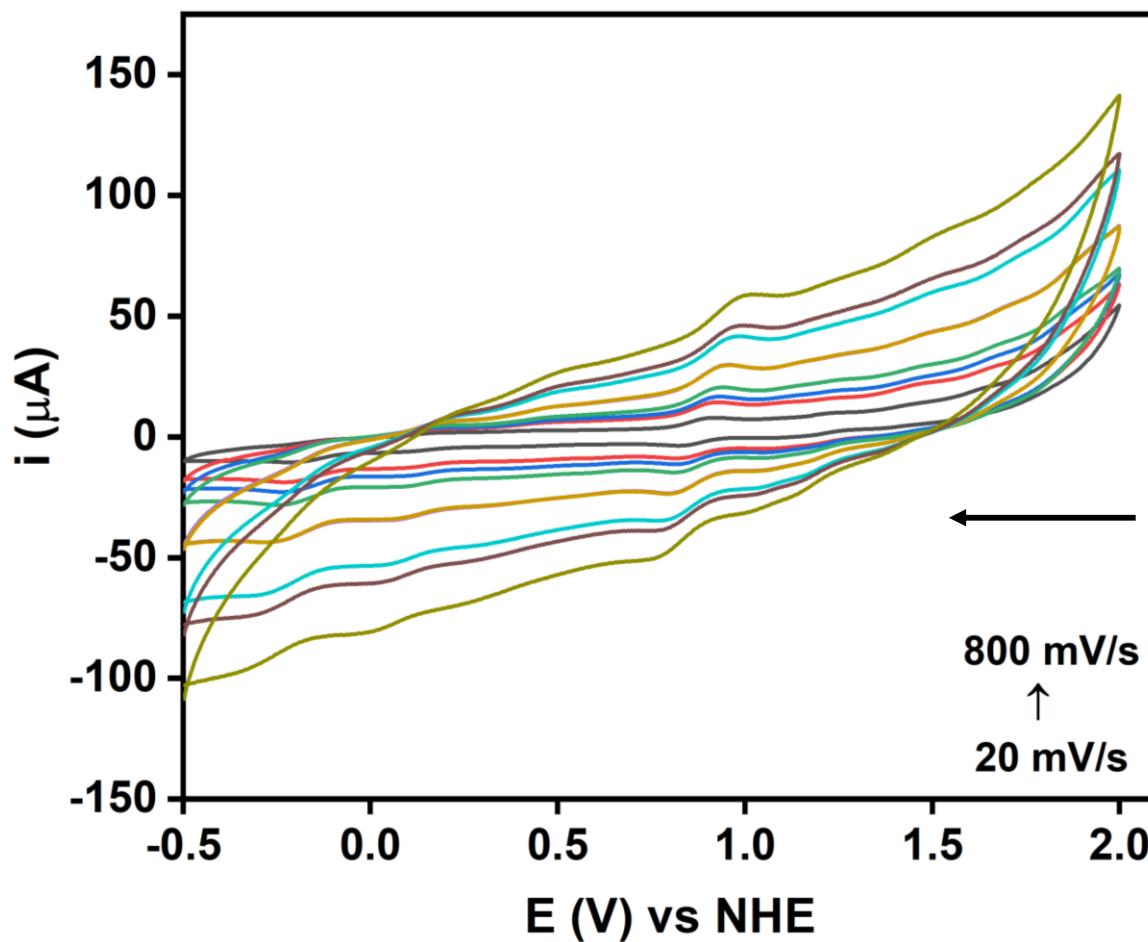

**Figure S36.** Cyclic voltammograms of **2b** in 0.1 M TBAH,  $\text{CH}_2\text{Cl}_2$ , at scan rates between 20 mV/s to 800 mV/s, after applying the CPE for 5 minutes at 2 V. Arrow indicates the starting potential and scanning direction.

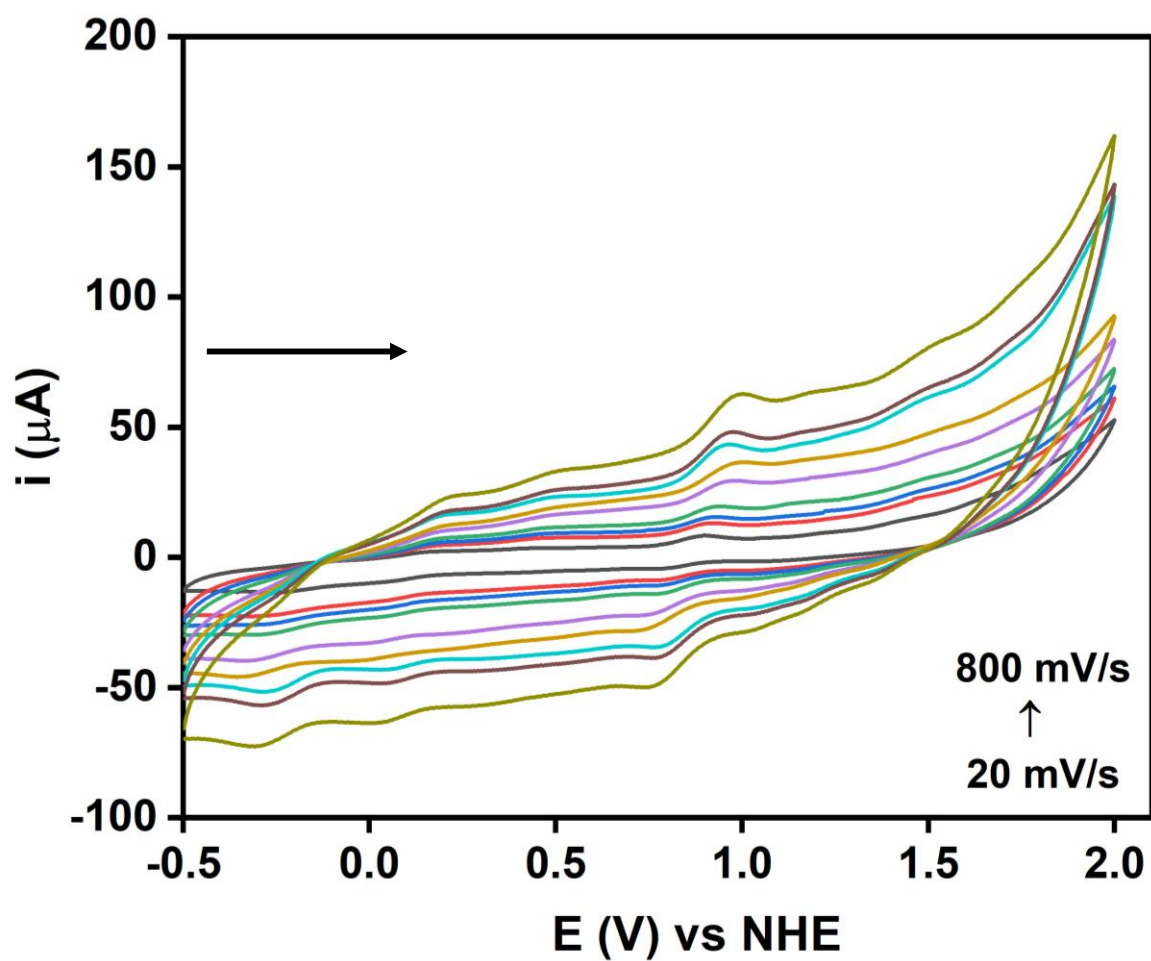

**Figure S37.** Cyclic voltammograms of **2b** in 0.1 M TBAH,  $\text{CH}_2\text{Cl}_2$ , at scan rates between 20 mV/s to 800 mV/s, after applying the CPE for 5 minutes at -0.5 V. Arrow indicates the starting potential and scanning direction.

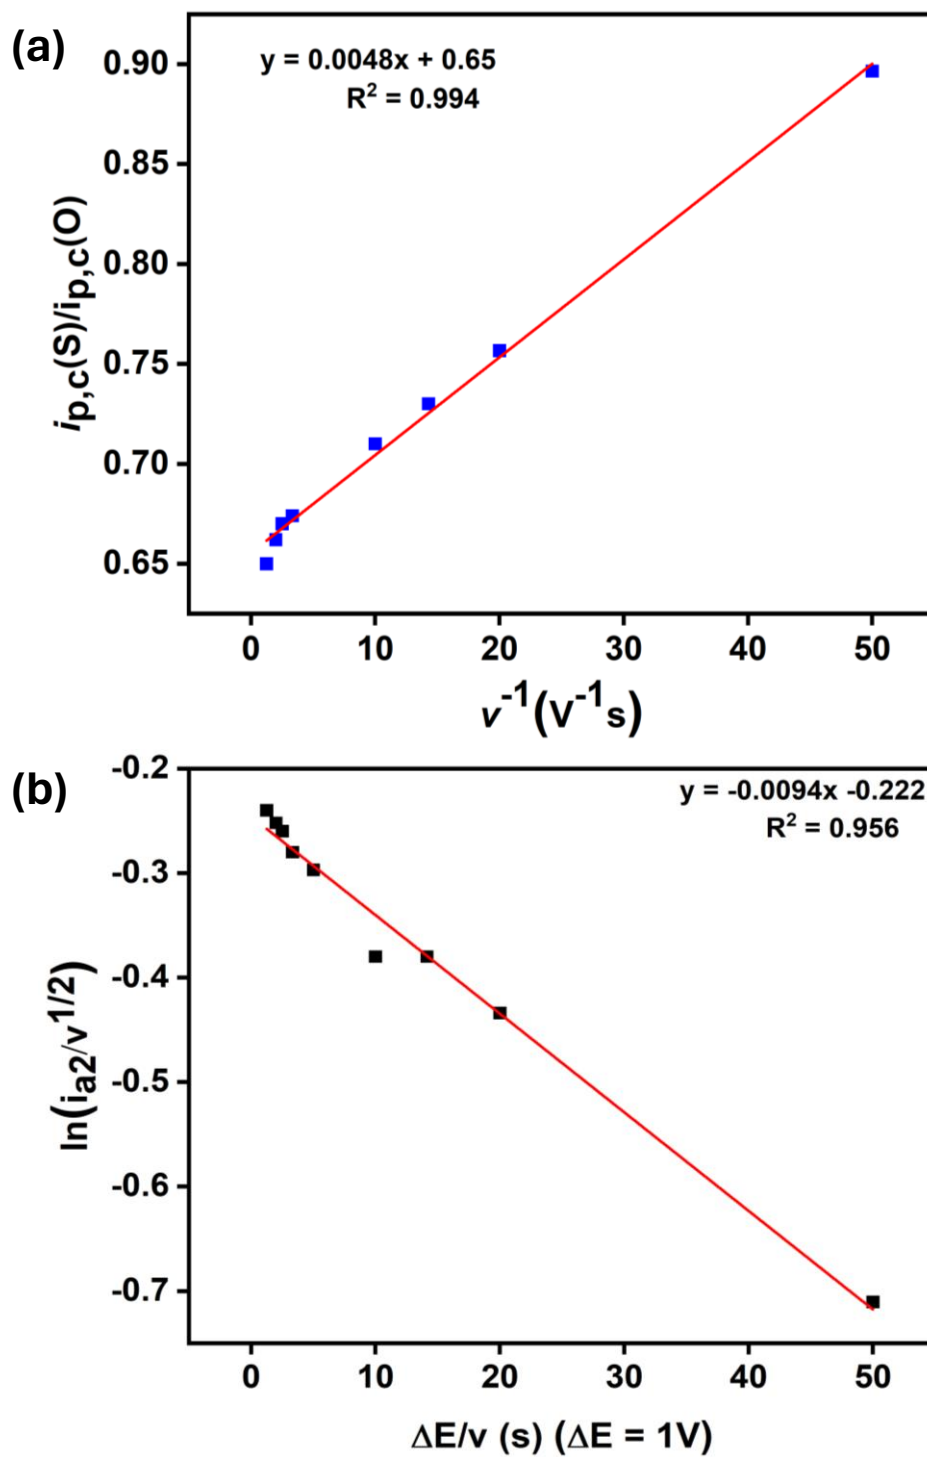

**Figure S38.** Plots of (a)  $i_{c1}/i_{c2}$  vs. inverse of the scan rate to obtain  $K^{III}_{O \rightarrow S}$  and (b)  $\ln(i_{a2}/\sqrt{v})$  vs. inverse of the scan rate to obtain  $k^{II}_{O \rightarrow S}$  for S-O linkage isomerization in complex **2b**.

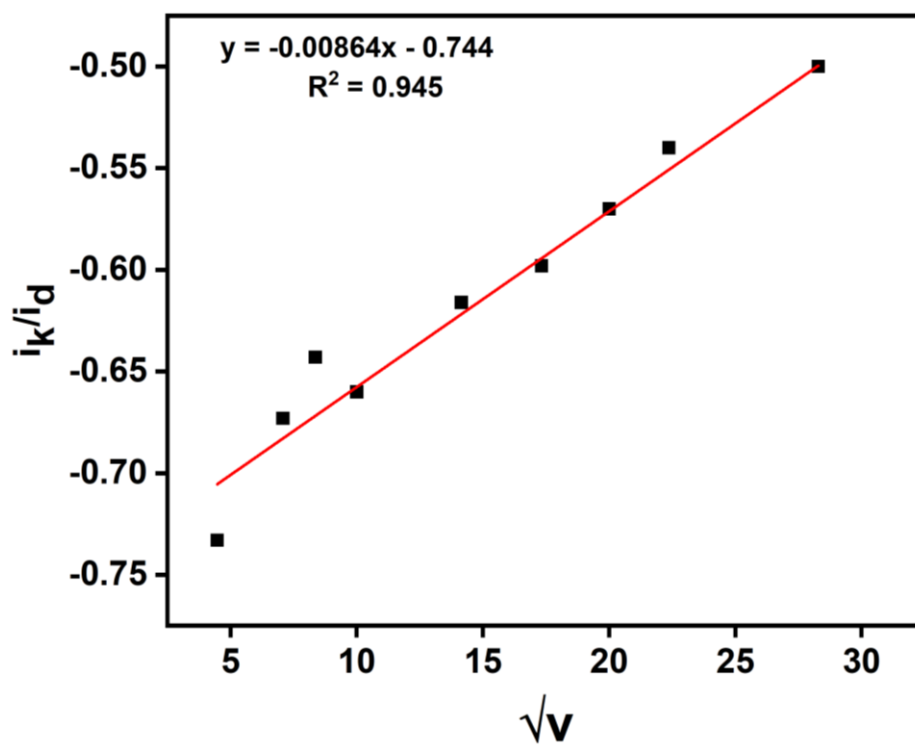

**Figure S39.** Plot of  $i_k/i_d$  vs.  $\sqrt{v}$  to obtain  $k_{S \rightarrow O}^{III}$  and  $k_{O \rightarrow S}^{III}$  for complex **2b**.

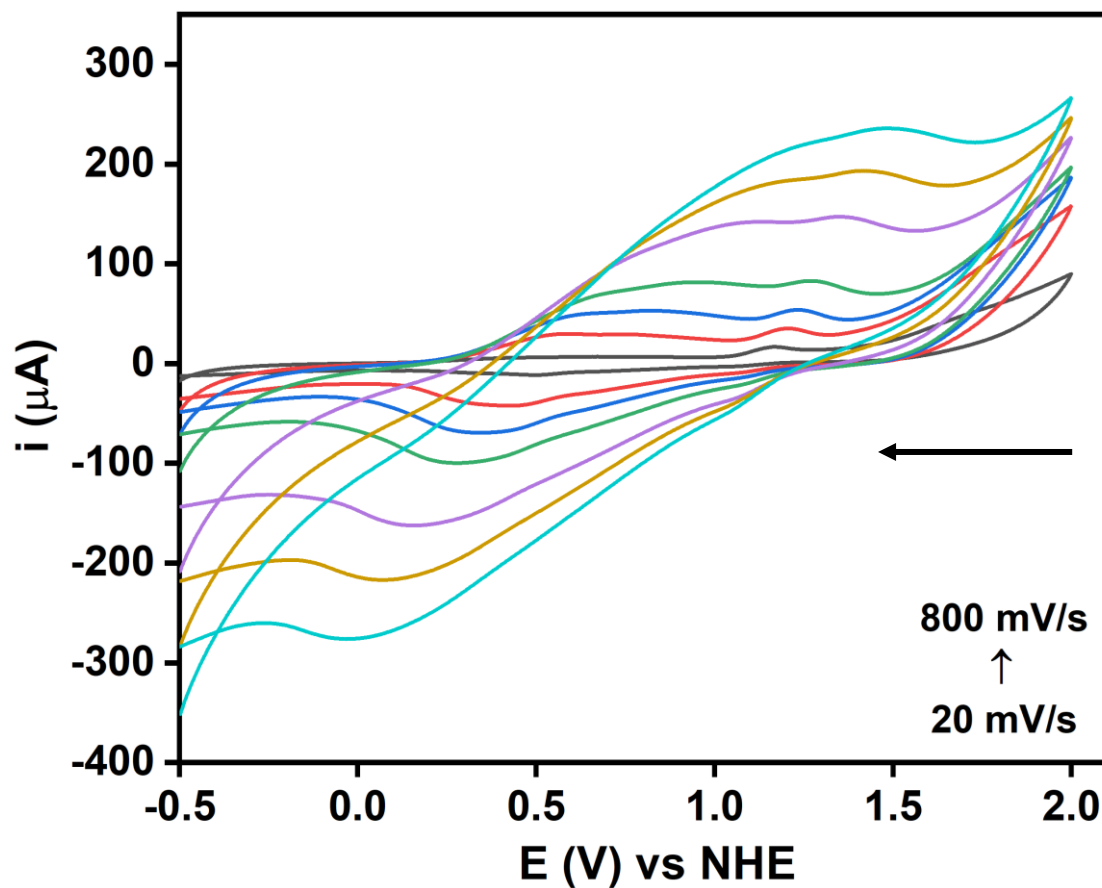

**Figure S40.** Cyclic voltammograms of **3a** in 0.1 M TBAH,  $\text{CH}_2\text{Cl}_2$ , at scan rates between 20  $\text{mV/s}$  to 800  $\text{mV/s}$ , after applying the CPE for 5 minutes at 2 V. Arrow indicates the starting potential and scanning direction.

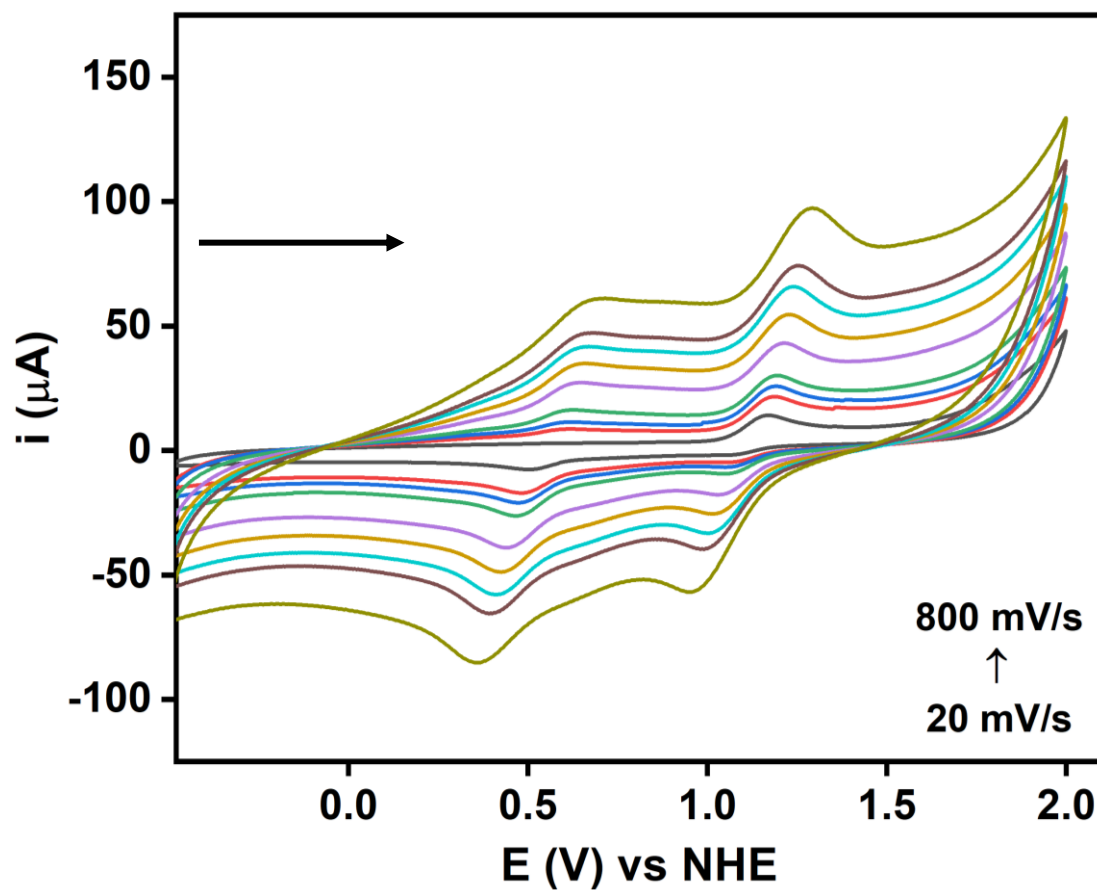

**Figure S41.** Cyclic voltammograms of **3a** in 0.1 M TBAH,  $\text{CH}_2\text{Cl}_2$ , at scan rates between 20 mV/s to 800 mV/s, after applying the CPE for 5 minutes at -0.5 V. Arrow indicates the starting potential and scanning direction.

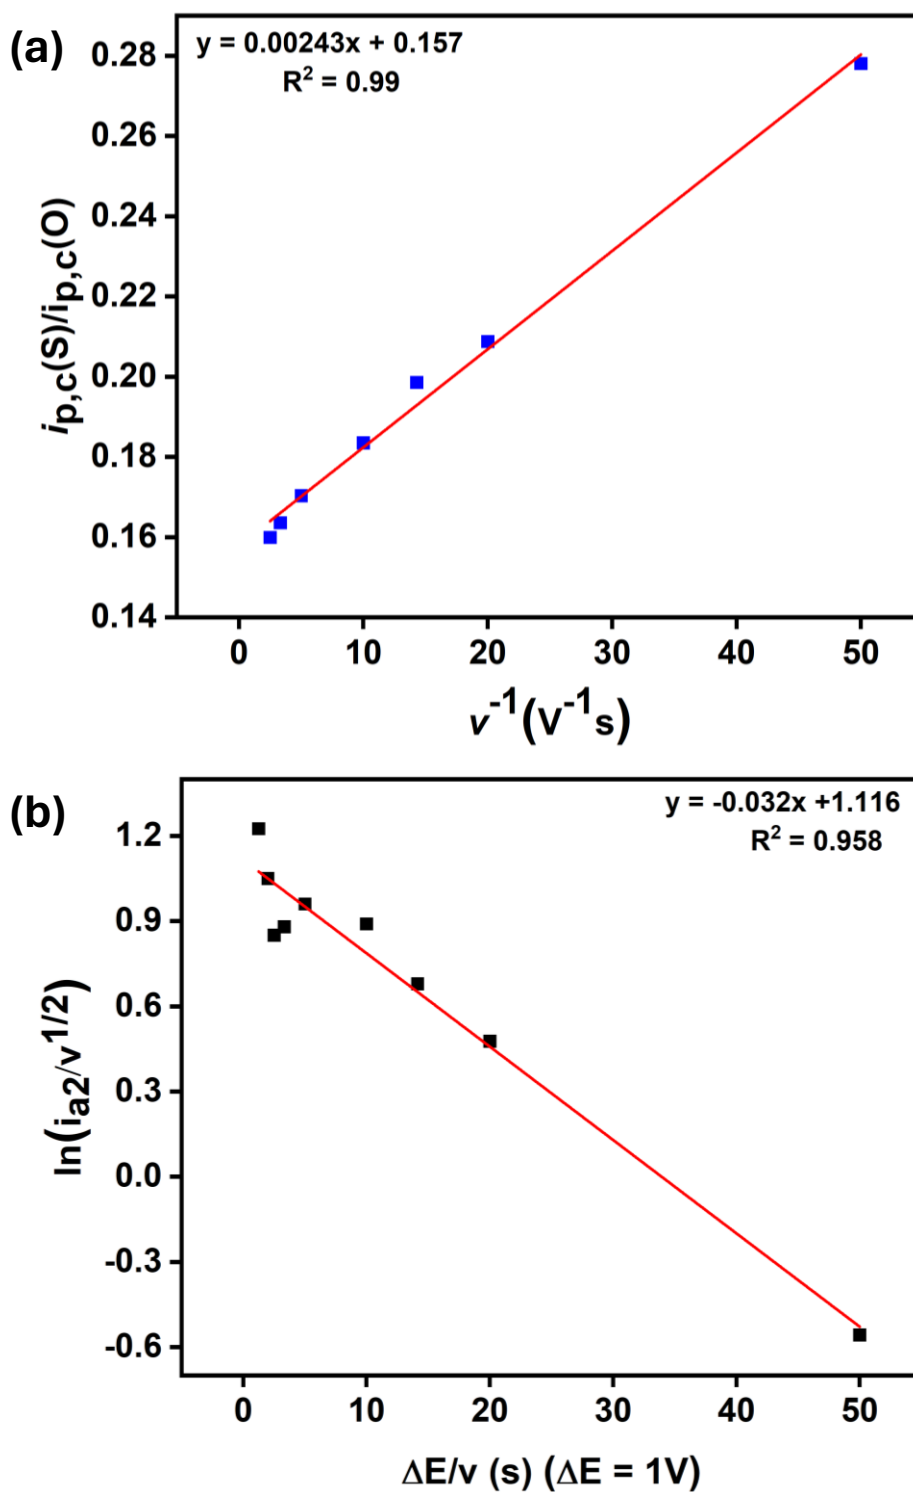

**Figure S42.** Plots of (a)  $i_{c1}/i_{c2}$  vs. inverse of the scan rate to obtain  $K^{III}_{O \rightarrow S}$  (b)  $\ln(i_{a2}/\sqrt{v})$  vs. inverse of the scan rate to obtain  $k^{II}_{O \rightarrow S}$  for S-O isomerization of DMSO ligand of complex **3a**.

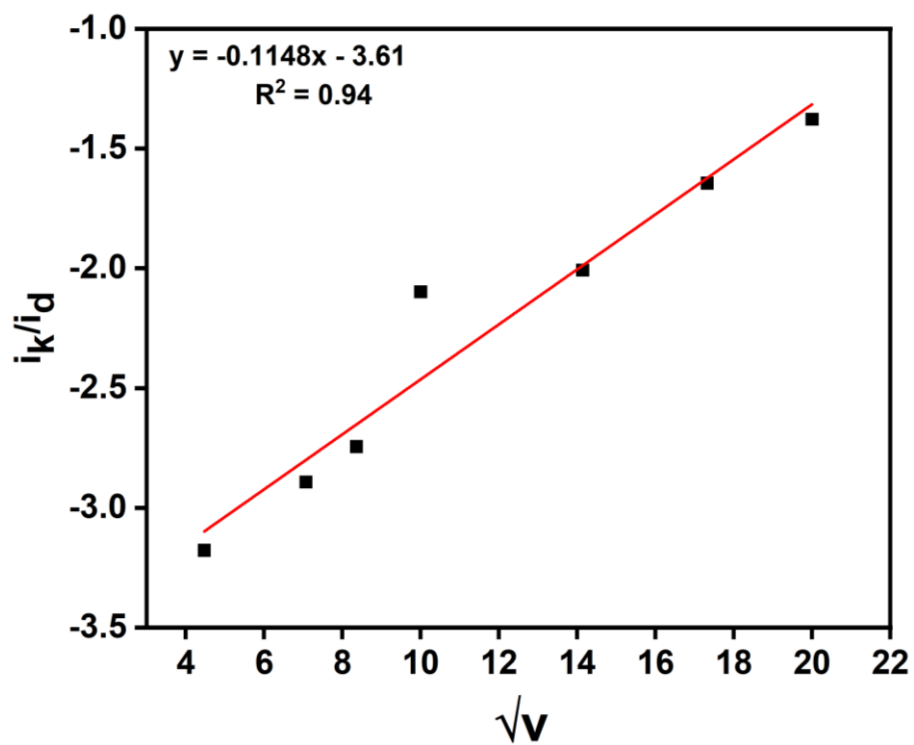

**Figure S43.** Plot of  $i_k/i_d$  vs.  $\sqrt{v}$  to obtain  $k_{O \rightarrow S}^{III}$  and  $k_{S \rightarrow O}^{III}$  for complex **3a**.



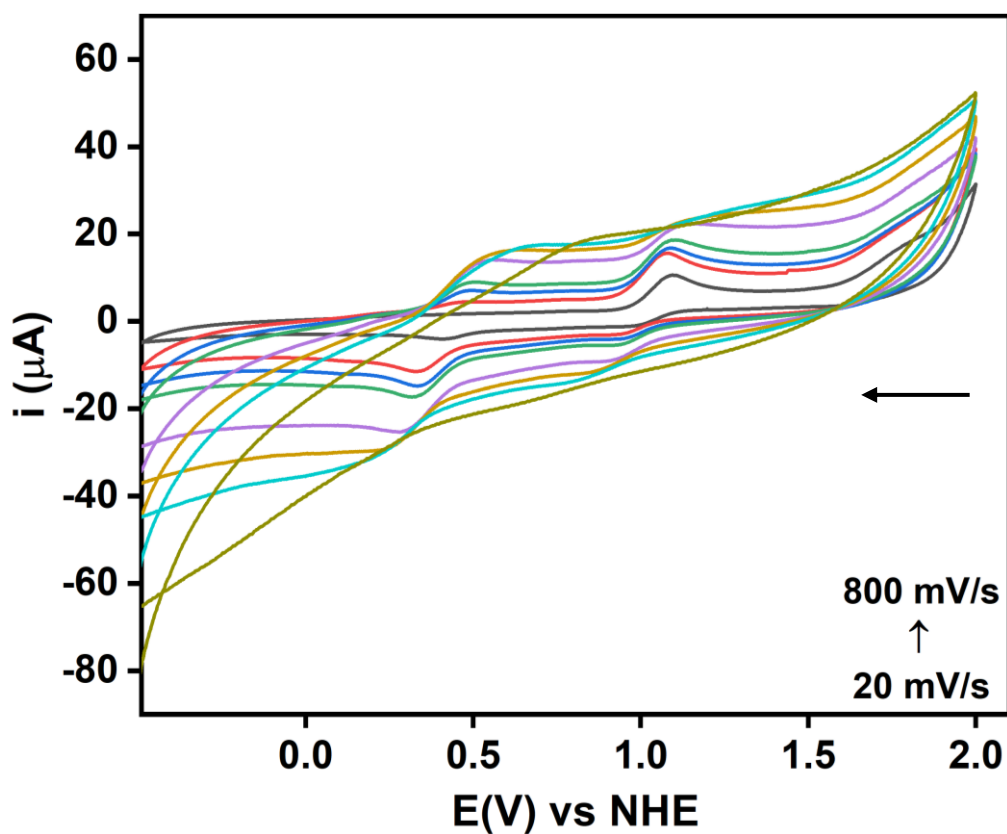

**Figure S44.** Cyclic voltammograms of **3b** in 0.1 M TBAH,  $\text{CH}_2\text{Cl}_2$ , at scan rates between 20 mV/s to 800 mV/s, after applying the CPE for 5 minutes at 2 V. Arrow indicates the starting potential and scanning direction.

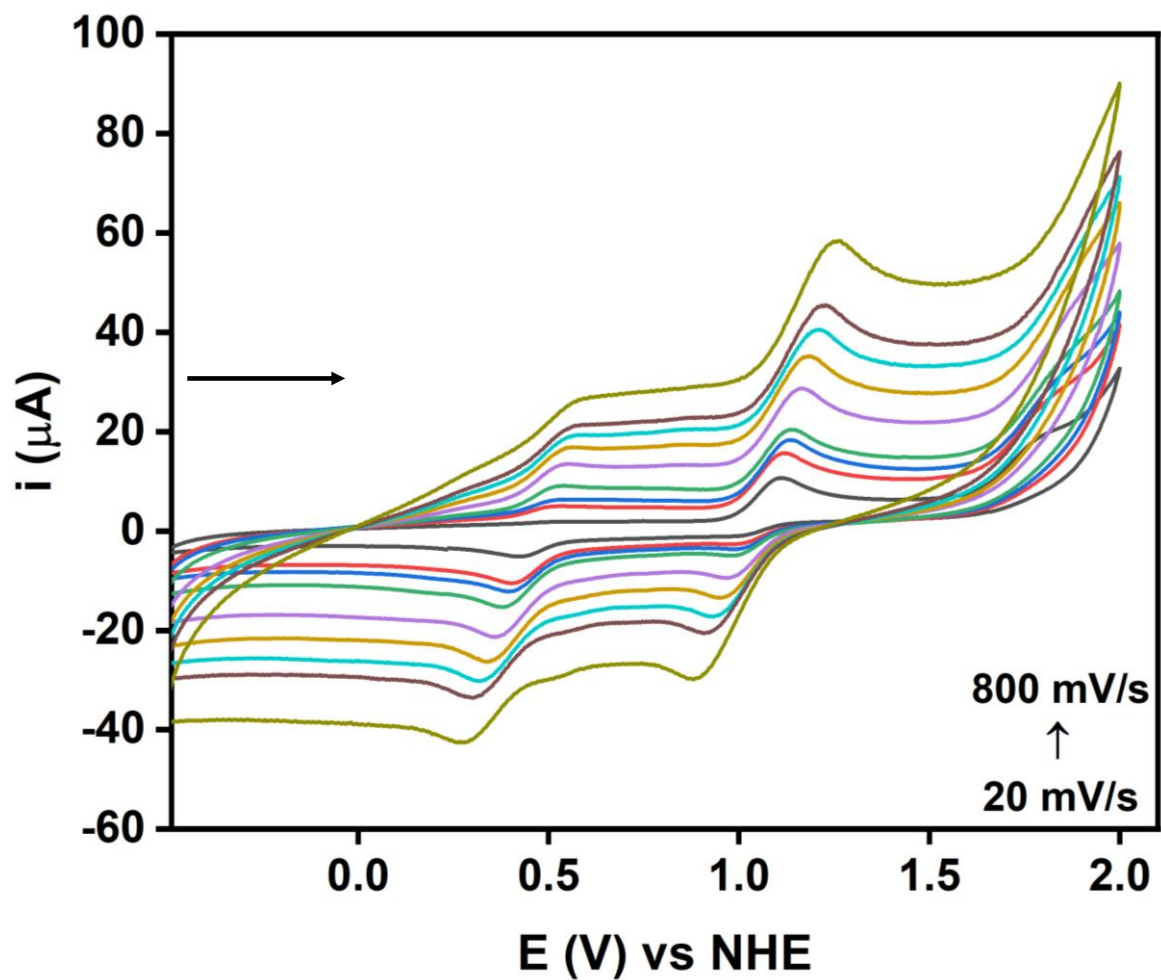

**Figure S45.** Cyclic voltammograms of **3b** in 0.1 M TBAH,  $\text{CH}_2\text{Cl}_2$ , at scan rates between 20 mV/s to 800 mV/s, after applying the CPE for 5 minutes at -0.5 V. Arrow indicates the starting potential and scanning direction.

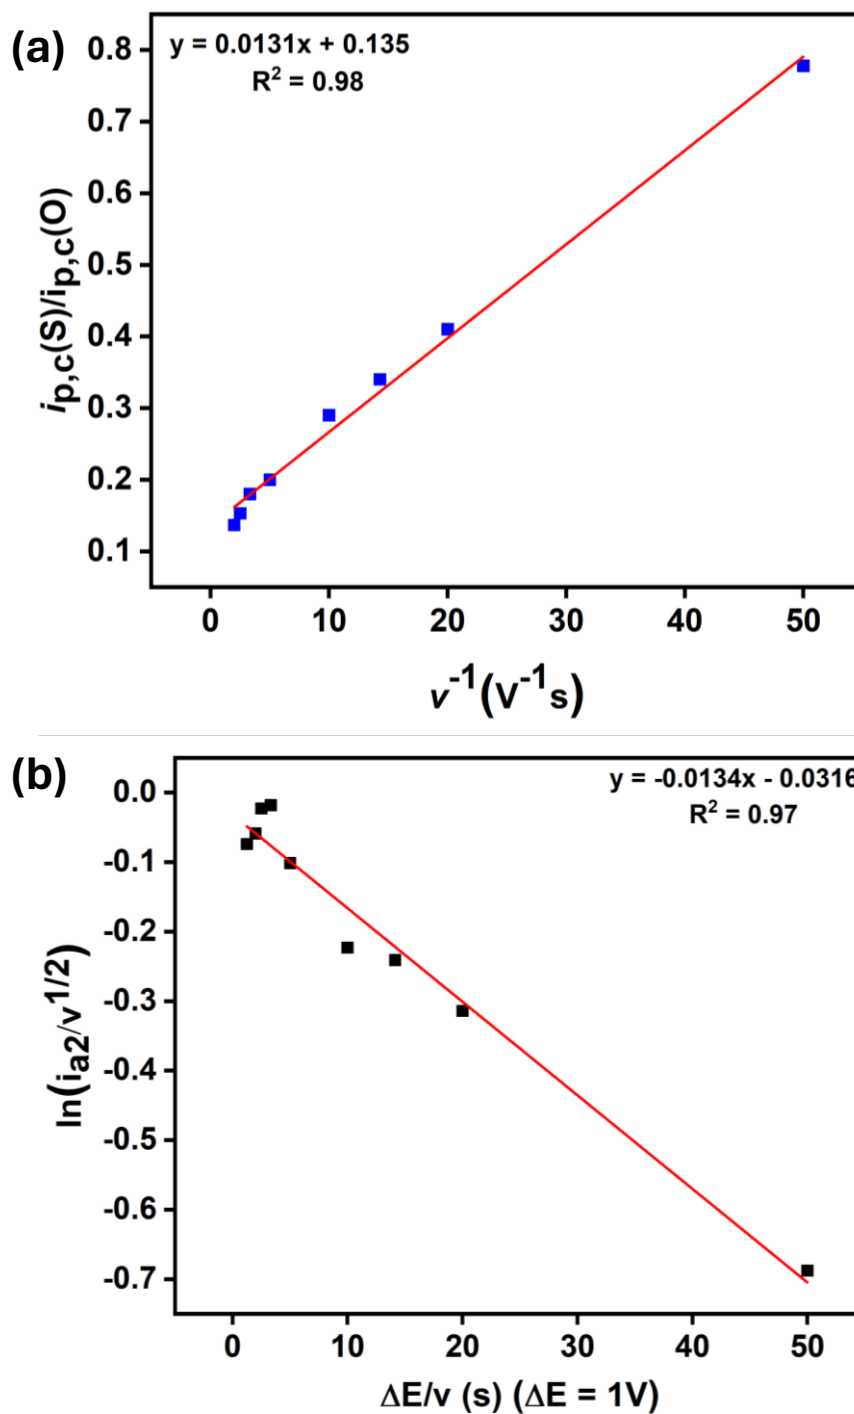

**Figure S46.** Plots of (a)  $i_{c1}/i_{c2}$  vs. inverse of the scan rate to obtain  $K^{\text{III}}_{\text{O-S}}$  (b)  $\ln(i_{a2}/\sqrt{v})$  vs. inverse of the scan rate to obtain  $K^{\text{II}}_{\text{O-S}}$  for S-O isomerization of DMSO ligand of complex **3b**.

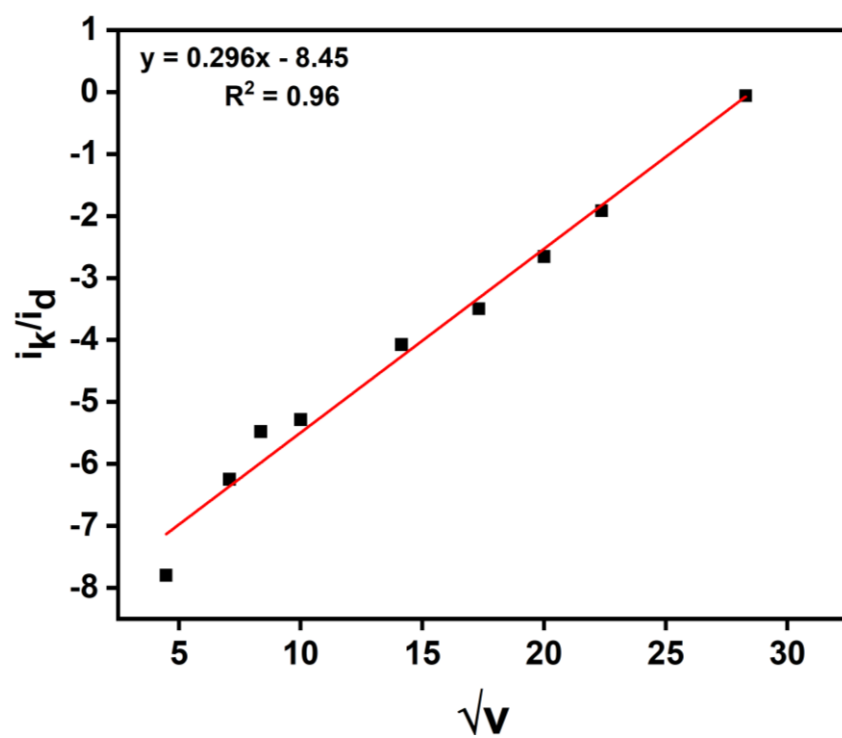

**Figure S47.** Plot of  $i_k/i_d$  vs.  $\sqrt{v}$  to obtain  $k^{\text{III}}_{\text{S} \rightarrow \text{O}}$  and  $k^{\text{III}}_{\text{O} \rightarrow \text{S}}$  for complex **3b**.

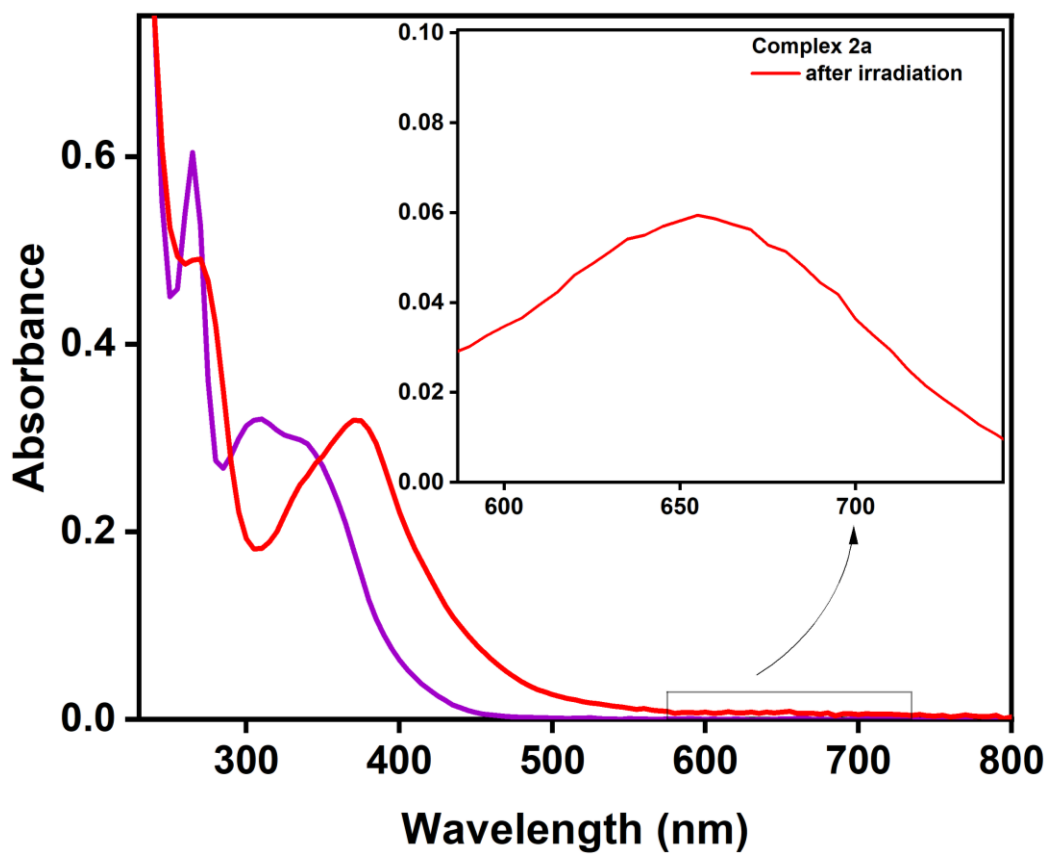

**Figure S48.** UV-vis spectrum of complex **2a** before and after irradiation, inset showing the lower energy absorption of irradiated sample of **2a**.

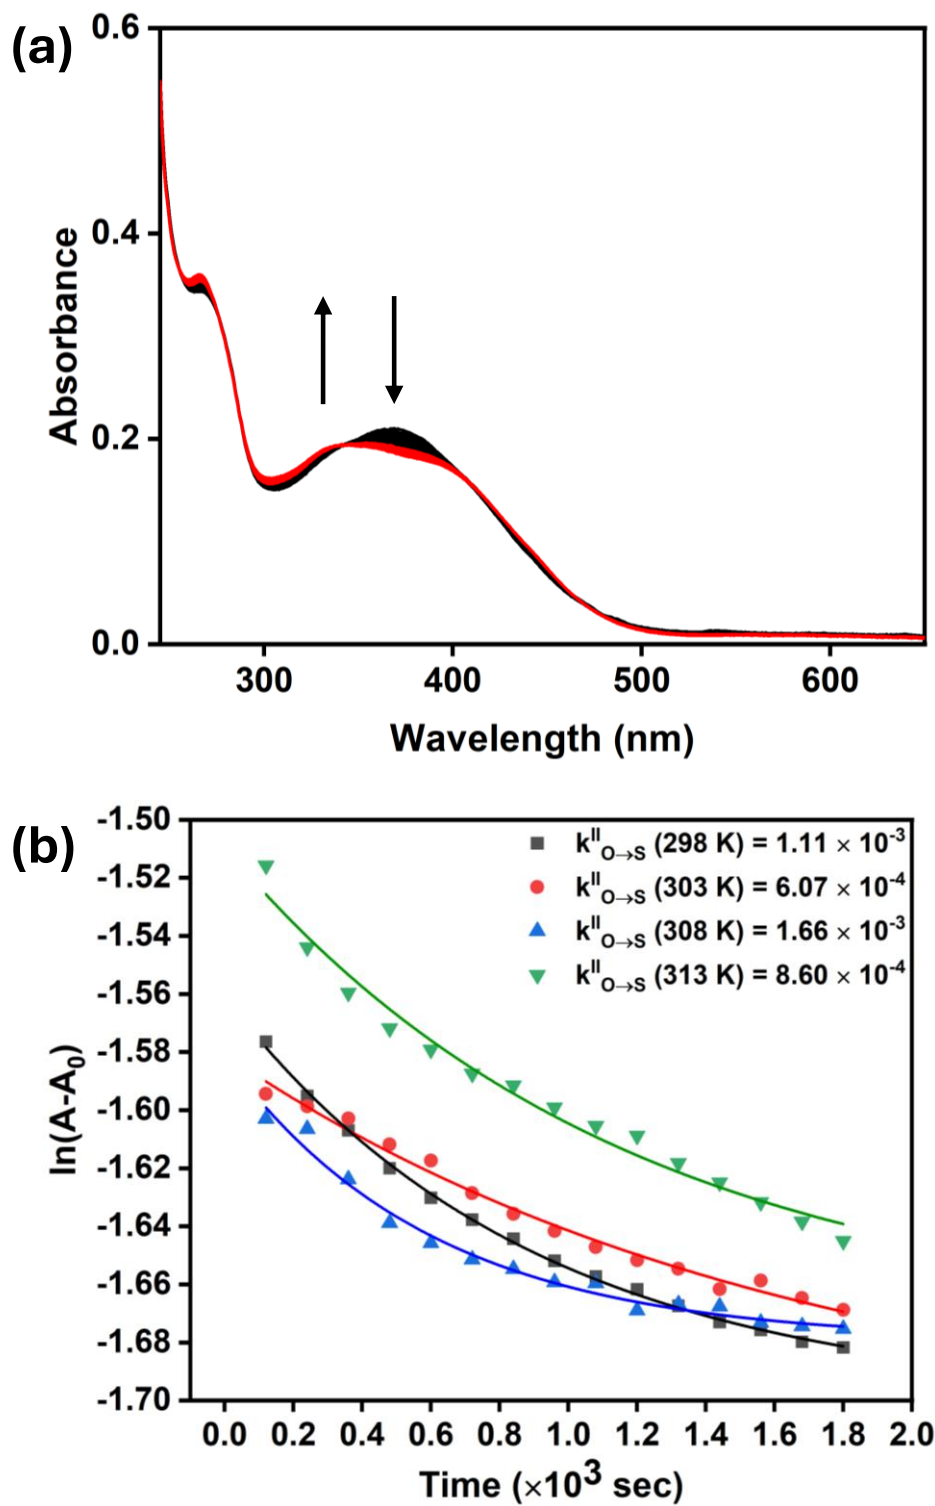

**Figure S49.** (a) UV-Vis spectra of O-bonded (black) and S-bonded (red) isomers of 2a in 10% DMSO in MeOH at 298 K and (b) kinetic data of 2a at 370 nm with exponential fit.

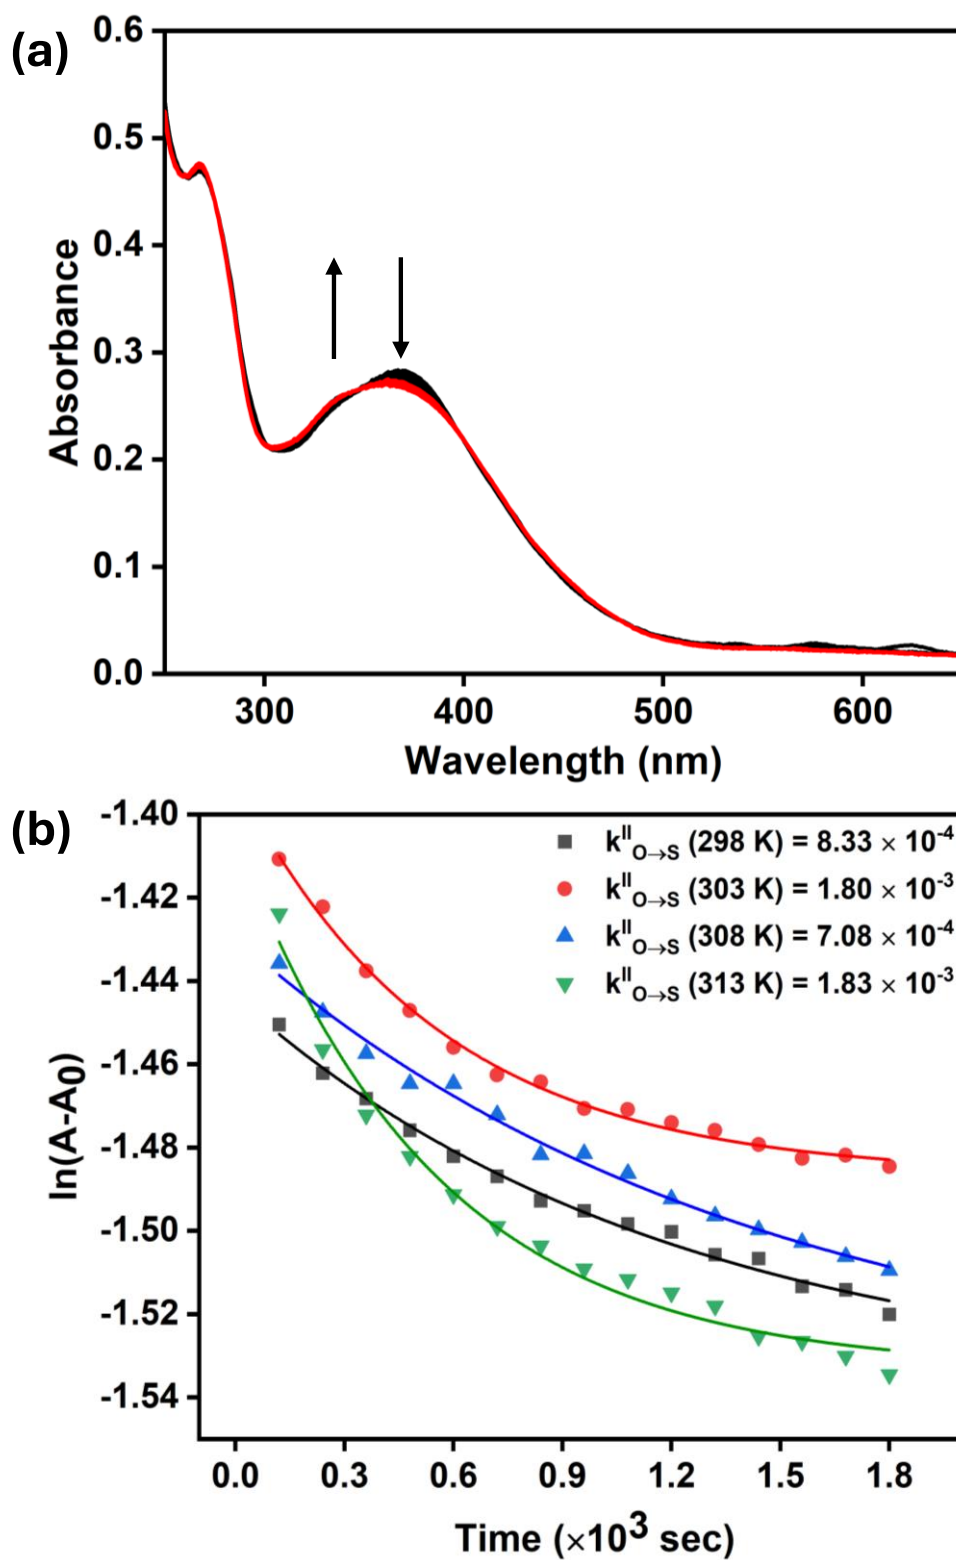

**Figure S50.** (a) UV-Vis spectra of O-bonded (black) and S-bonded (red) isomers of **2b** in 10% DMSO in MeOH at 298 K and (b) kinetic data of **2b** at 373 nm with exponential fit.

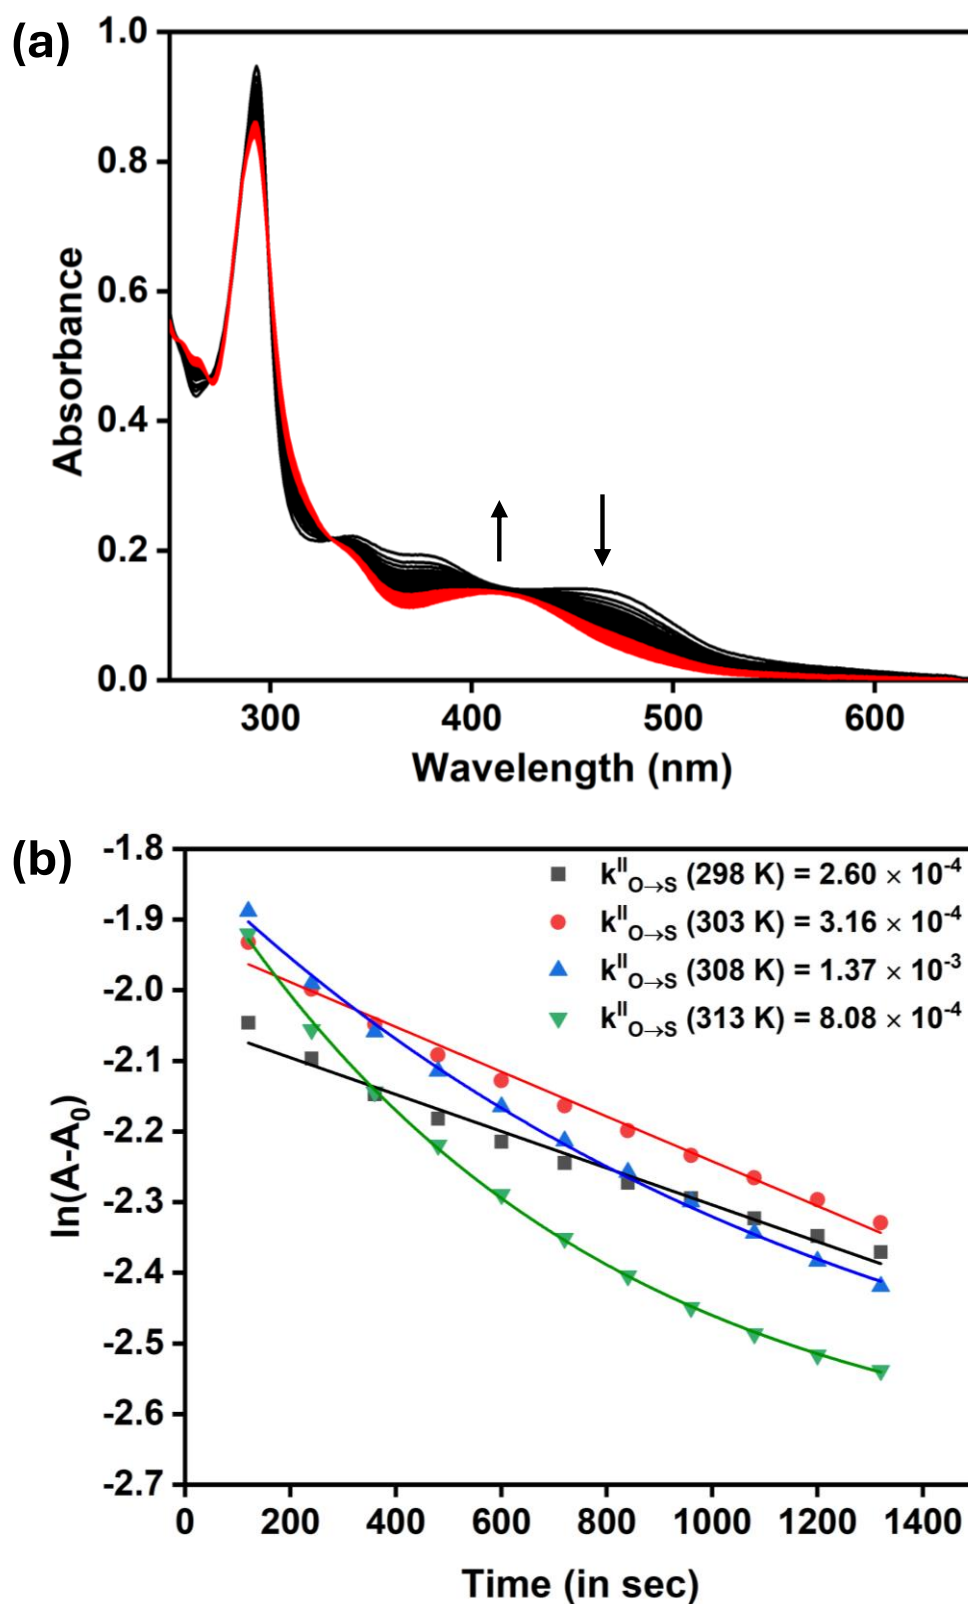

**Figure S51.** (a) UV-Vis spectra of O-bonded (black) and S-bonded (red) isomers of **3a** in 10% DMSO in MeOH at 298 K and (b) kinetic data of **3a** at 464 nm with exponential fit.



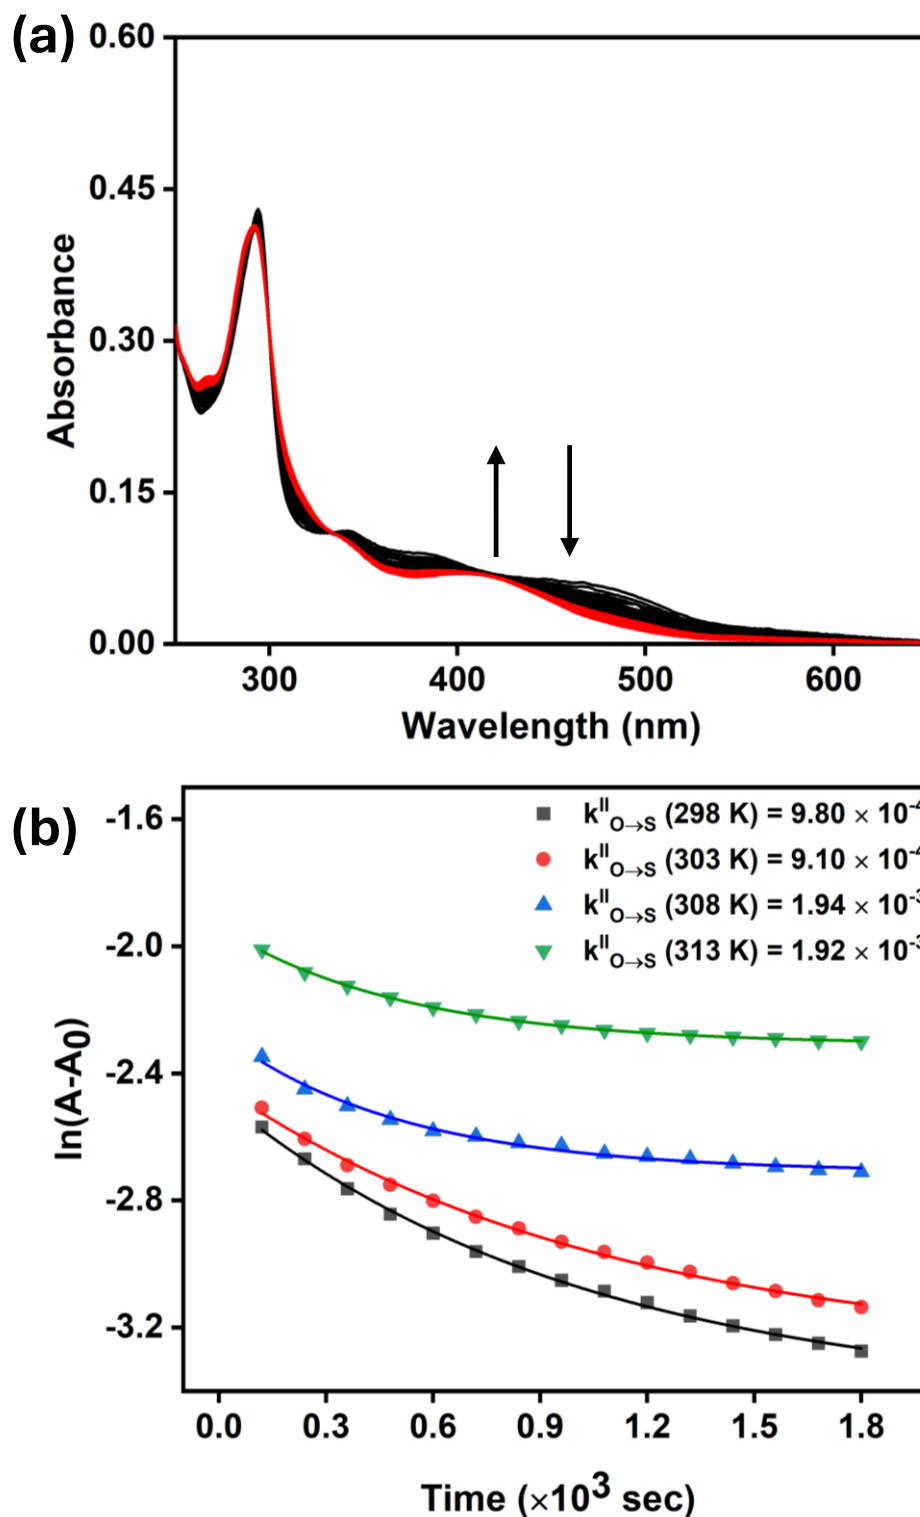

**Figure S52.** (a) UV-Vis spectra of O-bonded (black) and S-bonded (red) isomers of **3b** in 10% DMSO in MeOH at 298 K and (b) kinetic data of **3b** at 370 nm with exponential fit.

**Table S2. Reaction rates for the reversion of O→S isomerization in complexes 2a, 2b, 3a, and 3b at complex concentration of  $2.0 \times 10^{-3}$  mM in MeOH:DMSO (9:1).**

| Complex   | Temperature (K) | $k_{O \rightarrow S}^I$ ( $s^{-1}$ ) |                             |
|-----------|-----------------|--------------------------------------|-----------------------------|
|           |                 | MeOH                                 | MeOH:H <sub>2</sub> O (9:1) |
| <b>2a</b> | 298             | $8.19 \times 10^{-4}$                | $9.2 \times 10^{-4}$        |
| <b>2b</b> | 303             | $8.67 \times 10^{-5}$                | $2.10 \times 10^{-5}$       |
| <b>3a</b> | 308             | $4.82 \times 10^{-5}$                | $4.76 \times 10^{-5}$       |
| <b>3b</b> | 313             | $5.0 \times 10^{-5}$                 | $1.69 \times 10^{-5}$       |

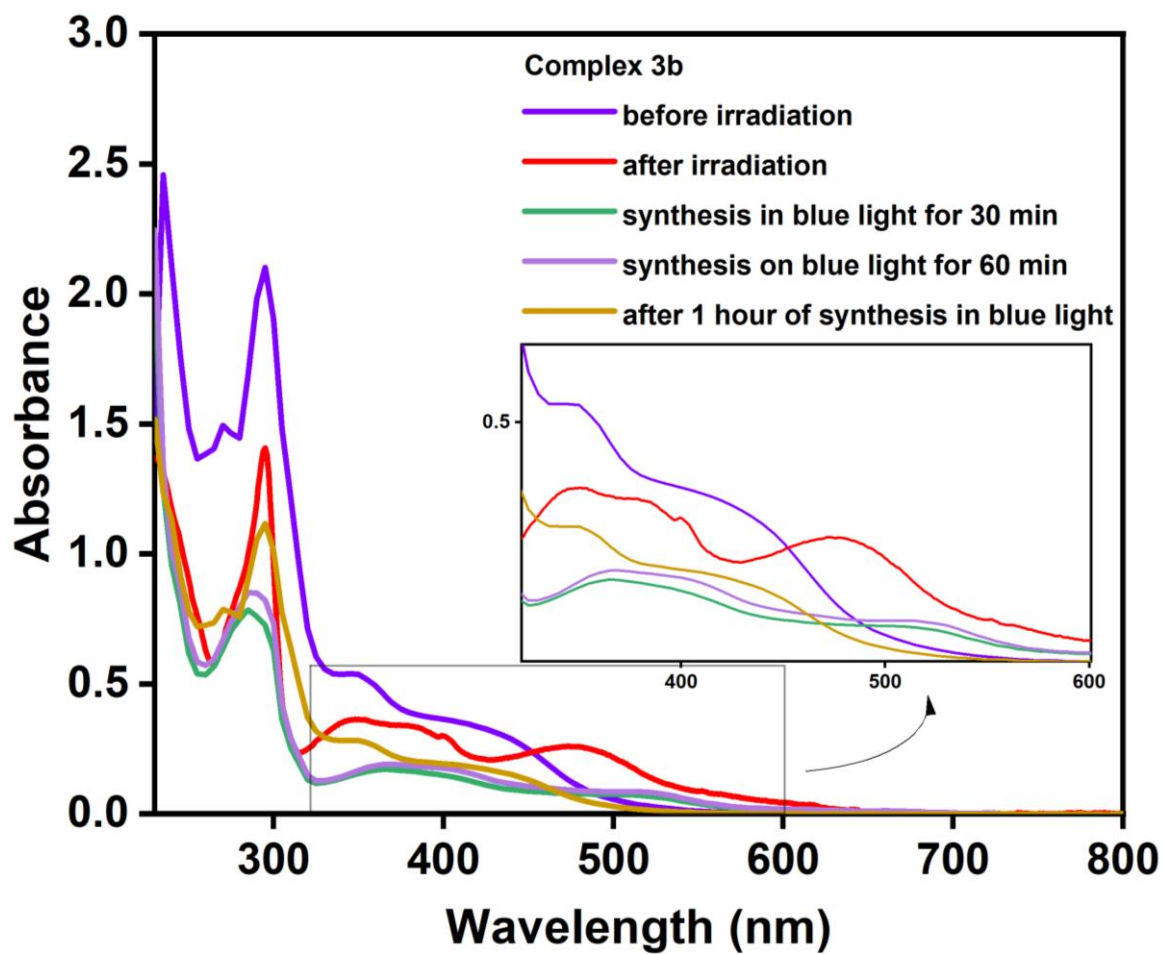

**Figure S53.** Comparative UV-vis spectra of complex **3b** synthesized in thermochemical and photochemical reaction conditions.

**Table S3.** Crystallographic parameters for complex **2a**.

|                                                                                                                                                | <b>2a</b>                                                                                      |
|------------------------------------------------------------------------------------------------------------------------------------------------|------------------------------------------------------------------------------------------------|
| <b>Empirical formula</b>                                                                                                                       | C <sub>13</sub> H <sub>21</sub> Cl <sub>2</sub> N <sub>3</sub> O <sub>2</sub> RuS <sub>2</sub> |
| <b>Fw/g M<sup>-1</sup></b>                                                                                                                     | 487.433                                                                                        |
| <b>Crystal system</b>                                                                                                                          | monoclinic                                                                                     |
| <b>Space group</b>                                                                                                                             | <i>P2<sub>1</sub>/n</i>                                                                        |
| <b><i>a</i>/Å</b>                                                                                                                              | 9.1097(2)                                                                                      |
| <b><i>b</i>/Å</b>                                                                                                                              | 14.8835(3)                                                                                     |
| <b><i>c</i>/Å</b>                                                                                                                              | 13.8216(3)                                                                                     |
| <b><i>α</i>/°</b>                                                                                                                              | 90                                                                                             |
| <b><i>β</i>/°</b>                                                                                                                              | 94.137(2)                                                                                      |
| <b><i>γ</i>/°</b>                                                                                                                              | 90                                                                                             |
| <b><i>V</i>/ Å<sup>3</sup></b>                                                                                                                 | 1869.11(7)                                                                                     |
| <b><i>Z</i></b>                                                                                                                                | 4                                                                                              |
| <b><i>T</i>, K</b>                                                                                                                             | 293(2)                                                                                         |
| <b><math>\rho_{\text{calcd}}</math>/Mg m<sup>-3</sup></b>                                                                                      | 1.732                                                                                          |
| <b><math>\lambda</math>/Å (Mo/Cu-K<math>\alpha</math>)</b>                                                                                     | 0.7107                                                                                         |
| <b>Data/restr./param.</b>                                                                                                                      | 3997/0/213                                                                                     |
| <b><i>F</i>(000)</b>                                                                                                                           | 981.618                                                                                        |
| <b>GOOF</b>                                                                                                                                    | 1.2555                                                                                         |
| <b>R (int)</b>                                                                                                                                 | 0.1306                                                                                         |
| <b><i>R</i>(<i>F</i><sub>o</sub>),<sup>a</sup> <i>I</i> &gt; 2 <math>\sigma</math>(<i>I</i>) [<i>wR</i>(<i>F</i><sub>o</sub>)<sup>b</sup>]</b> | 0.0588 [0.1234]                                                                                |
| <b><i>R</i> (all data) [<i>wR</i> (all data)]</b>                                                                                              | 0.0966 [0.1735]                                                                                |

**Table S4.** Selected bond lengths and angles for the complex **2a**.

| Complex   | Bond lengths (Å) |            | Bond Angles (°) |            |
|-----------|------------------|------------|-----------------|------------|
|           |                  |            |                 |            |
| <b>2a</b> | Ru1-C1           | 1.992(6)   | C1 Ru1 N1       | 78.6(2)    |
|           | Ru1-N1           | 2.077(5)   | C1 Ru1 Cl1      | 100.10(17) |
|           | Ru1-Cl1          | 2.4347(16) | C1 Ru1 Cl2      | 171.49(16) |
|           | Ru1-Cl2          | 2.4770(17) | C1 Ru1 S1       | 88.50(6)   |
|           | Ru1-S1           | 2.3026(18) | C1 Ru1 S2       | 93.24(6)   |
|           | Ru1-S2           | 2.3021(18) | N1 Ru1 Cl1      | 178.12(14) |
|           |                  |            | N1 Ru1 Cl2      | 93.52(15)  |
|           |                  |            | N1 Ru1 S1       | 90.13(14)  |
|           |                  |            | N1 Ru1 S2       | 88.06(14)  |
|           |                  |            | Cl1 Ru1 Cl2     | 87.81(6)   |
|           |                  |            | Cl1 Ru1 S1      | 88.50(6)   |
|           |                  |            | Cl1 Ru1 S2      | 93.24(6)   |
|           |                  |            | Cl2 Ru1 S1      | 92.19(6)   |
|           |                  |            | Cl2 Ru1 S2      | 90.92(6)   |
|           |                  |            | S1 Ru1 S2       | 176.49(6)  |

## XYZ Coordinates

### 2a: [Ru(CN)(Cl)<sub>2</sub>(S-DMSO)<sub>2</sub>]

|    |                   |                   |                   |
|----|-------------------|-------------------|-------------------|
| Ru | 1.24352286250027  | -0.06062185735257 | -0.03982825649056 |
| S  | 1.43182881148262  | -1.46939524891577 | -1.87095052827295 |
| S  | 1.06256351444319  | 1.35521755287920  | 1.78109865924453  |
| Cl | 3.22331759589192  | 1.10206926166530  | -0.88335979818922 |
| Cl | 2.77850036228090  | -1.49379855672693 | 1.30581320655012  |
| N  | -0.44288806469017 | -1.14001450706831 | 0.52455908536258  |
| N  | -1.46897226347506 | 0.44497590338835  | -0.76314195029373 |
| O  | 0.35311909511957  | -2.50501512667299 | -2.06498924002171 |
| O  | -0.06706865144725 | 2.35788378648874  | 1.77190059425117  |
| C  | -0.18903793752346 | 0.97133529055174  | -0.91736301058250 |
| C  | -1.60820261268140 | -0.71832835743796 | -0.01820745243940 |
| N  | -0.40714375913373 | 2.13905773871096  | -1.57445551627224 |
| C  | -0.45489104119097 | -2.27967647549208 | 1.24210504976978  |
| H  | 0.51366797991608  | -2.58738767780688 | 1.62719016617548  |
| C  | -2.43673631898512 | 1.28774810883137  | -1.29563370920453 |
| H  | -3.49241634598825 | 1.07314502081562  | -1.27947413191741 |
| C  | -2.81182493585153 | -1.38626681150477 | 0.15787489776272  |
| H  | -3.72118727951778 | -1.01358863979298 | -0.29870572606602 |
| C  | -1.76583816003623 | 2.34659314387145  | -1.79552374450544 |
| H  | -2.13340089962863 | 3.23057691351920  | -2.29338910381401 |
| C  | -1.61491634450806 | -3.00063202417570 | 1.46148737672796  |
| H  | -1.57064429558506 | -3.91244064781548 | 2.04611093667570  |
| C  | -2.81215441705615 | -2.54641868473059 | 0.91594982585583  |
| H  | -3.73633045884187 | -3.09386662946004 | 1.06958682217870  |
| C  | 1.53854253601182  | -0.51820504689374 | -3.42588213124641 |
| H  | 0.57796909318247  | -0.01084131139658 | -3.54167435457203 |
| H  | 2.35125419691844  | 0.20712246907403  | -3.33507332437926 |
| H  | 1.69955267336174  | -1.22653738972319 | -4.24288753927939 |
| C  | 3.04622046873898  | -2.30866871684207 | -1.93400906455425 |
| H  | 3.82536093191721  | -1.55456784522672 | -1.79409898815719 |
| H  | 3.05847084818764  | -3.01265724542164 | -1.10079586227053 |
| H  | 3.11708459930231  | -2.81896689315456 | -2.89836756182689 |
| C  | 0.60089767570428  | 3.16746818389964  | -1.80324199391027 |
| H  | 1.58889123461135  | 2.71499161464818  | -1.69908074607566 |
| H  | 0.48223303245686  | 3.58071197072573  | -2.80958232628744 |
| H  | 0.48429796390128  | 3.96380493445839  | -1.05989749187827 |
| C  | 0.91701961812683  | 0.43244992383955  | 3.35263259614872  |
| H  | 0.04571405927787  | -0.21974044493142 | 3.26100624400089  |
| H  | 1.82001734420968  | -0.16244814050139 | 3.50239295745991  |
| H  | 0.75765438896850  | 1.17271384294377  | 4.14160061816993  |
| C  | 2.61791006872968  | 2.23193681188174  | 2.14095903933193  |
| H  | 3.41149288224084  | 1.48332858226060  | 2.21706145889170  |
| H  | 2.81915542266007  | 2.89163603299002  | 1.29629658264980  |
| H  | 2.47339452599829  | 2.79031719160081  | 3.06998743529985  |

### 2a<sup>+</sup>: [Ru(CN)(Cl)<sub>2</sub>(S-DMSO)<sub>2</sub>]<sup>+</sup>

|    |                  |                   |                   |
|----|------------------|-------------------|-------------------|
| Ru | 1.34041350958115 | -0.00601011236856 | -0.05150535029626 |
|----|------------------|-------------------|-------------------|

|    |                   |                   |                   |
|----|-------------------|-------------------|-------------------|
| S  | 1.43743431446549  | -1.49546706150252 | -1.88614952366364 |
| S  | 1.24391589174319  | 1.51846103121414  | 1.73928813356562  |
| Cl | 3.09259906161255  | 1.20019258405305  | -0.99485118576072 |
| Cl | 2.73961126939564  | -1.39732206199448 | 1.28248835761877  |
| N  | -0.38129091338248 | -1.14579591025129 | 0.54214703779344  |
| N  | -1.45436645891942 | 0.42407896432465  | -0.73610765219329 |
| O  | 0.32292184313593  | -2.49643128193423 | -1.96382996982435 |
| O  | 0.44623231998523  | 2.76465545174057  | 1.48805204365424  |
| C  | -0.22520734879385 | 1.02293229044795  | -0.86990758129036 |
| C  | -1.54826306609193 | -0.76658731429840 | -0.01573777613375 |
| N  | -0.48092378454528 | 2.20247548825101  | -1.46516453769200 |
| C  | -0.36271283911325 | -2.29630281671125 | 1.24414019564943  |
| H  | 0.59717774001893  | -2.58512456726189 | 1.65604981837418  |
| C  | -2.46258258881357 | 1.23005630200855  | -1.25159560914396 |
| H  | -3.50661240600693 | 0.96423679008105  | -1.23776141786092 |
| C  | -2.72509224681133 | -1.48748235998258 | 0.11248345902444  |
| H  | -3.63644214768196 | -1.15022822041936 | -0.36651628301187 |
| C  | -1.84386108784635 | 2.33687825155964  | -1.71245044643630 |
| H  | -2.24928039881556 | 3.21795769027619  | -2.18630371543382 |
| C  | -1.49636013064408 | -3.06564139727951 | 1.42621049102374  |
| H  | -1.42749828856651 | -3.97897378119028 | 2.00596756451343  |
| C  | -2.69468454569128 | -2.65961179380899 | 0.85010869313874  |
| H  | -3.59608437135866 | -3.25263207571758 | 0.96530989505300  |
| C  | 1.48554178537160  | -0.59170932545943 | -3.46803058432076 |
| H  | 0.54572902740694  | -0.03966050682240 | -3.54525395511582 |
| H  | 2.33860826389052  | 0.09029508799320  | -3.47218073007991 |
| H  | 1.55286630466271  | -1.33898987738302 | -4.26335452393548 |
| C  | 3.03655999698745  | -2.35662258759398 | -1.96847108705643 |
| H  | 3.83423619457982  | -1.60908150513129 | -1.94178134458026 |
| H  | 3.09425136168259  | -3.00232095478978 | -1.09060009329396 |
| H  | 3.04667118271240  | -2.94009043049457 | -2.89309064847809 |
| C  | 0.46316849282025  | 3.28576590776174  | -1.74531314992105 |
| H  | 1.43660970698727  | 3.03026712113250  | -1.33602754038851 |
| H  | 0.54185143607075  | 3.43763453572408  | -2.82605607085464 |
| H  | 0.09914806775122  | 4.19646469517908  | -1.26341603461238 |
| C  | 0.59766595688112  | 0.71161872438511  | 3.23946665077399  |
| H  | -0.43202835151075 | 0.41582910738779  | 3.02583868642727  |
| H  | 1.21605422387596  | -0.16100310586993 | 3.46653745506367  |
| H  | 0.62129480450639  | 1.44889001414167  | 4.04649298184097  |
| C  | 2.89986294729522  | 1.98752346300231  | 2.32742516892107  |
| H  | 3.46794525466975  | 1.07880344973375  | 2.54157247925926  |
| H  | 3.37164834321737  | 2.55341583505973  | 1.52243514930469  |
| H  | 2.75927167328572  | 2.60965626280755  | 3.21544255037861  |

**2a': [Ru(CN)(Cl)2(S-DMSO)(O-DMSO)]**

|    |                   |                   |                   |
|----|-------------------|-------------------|-------------------|
| Ru | 1.32019574607936  | -0.27155428711160 | -0.13992963339719 |
| S  | 1.40589928301946  | -1.44129257340053 | -2.02625500246209 |
| Cl | 3.33469202359107  | 0.97752304151199  | -0.72873702608382 |
| Cl | 2.78331058533352  | -1.85646961351035 | 1.14325630568235  |
| N  | -0.39651064017579 | -1.26245856270663 | 0.44852647400970  |

|   |                   |                   |                   |
|---|-------------------|-------------------|-------------------|
| N | -1.37132903957064 | 0.48515304378909  | -0.65023156096026 |
| O | 0.26663135832056  | -2.36430267159132 | -2.37720454904776 |
| C | -0.05827525072063 | 0.90760095797974  | -0.87404183187712 |
| C | -1.56050476899064 | -0.69570988232010 | 0.05539812566851  |
| N | -0.22872350460347 | 2.09113740589658  | -1.53174573149756 |
| C | -0.46130478168010 | -2.41780174412834 | 1.13657137874133  |
| H | 0.50086016263780  | -2.83370469338331 | 1.42075751476891  |
| C | -2.29835641221791 | 1.38050672947028  | -1.16526961429861 |
| H | -3.36512535764107 | 1.24272011646043  | -1.10089456986190 |
| C | -2.80565771751552 | -1.24489401503975 | 0.32716391149871  |
| H | -3.71132663787483 | -0.75903727539718 | -0.01704413934294 |
| C | -1.57782368252066 | 2.38098980250761  | -1.71577690551049 |
| H | -1.90485872829154 | 3.27697191567083  | -2.22093814954840 |
| C | -1.66454805952037 | -3.02569043158760 | 1.44896656510286  |
| H | -1.65920551005081 | -3.95892156988966 | 2.00096127982357  |
| C | -2.85548606849318 | -2.43404794452617 | 1.03842253683523  |
| H | -3.81273836904737 | -2.89358636203675 | 1.26254640372711  |
| C | 1.64030822605869  | -0.35825592287680 | -3.48508365561577 |
| H | 0.71606219316568  | 0.21505852853040  | -3.58908018509328 |
| H | 2.49085828159220  | 0.30184157874529  | -3.29452176803129 |
| H | 1.79155285087369  | -0.99393705501887 | -4.36168662214165 |
| C | 2.95981329400029  | -2.38892188770504 | -2.15067273870133 |
| H | 3.78994169996308  | -1.70176935045644 | -1.96438096408124 |
| H | 2.92608713975366  | -3.14360982922803 | -1.36392767398429 |
| H | 2.99611596505307  | -2.84030627108121 | -3.14599569957266 |
| C | 0.84177430149141  | 2.96236107573548  | -1.99814147956023 |
| H | 1.79397575966007  | 2.55589323898194  | -1.64946504133095 |
| H | 0.83959317222327  | 3.01066743072776  | -3.09336861552912 |
| H | 0.69880141240980  | 3.97021372396438  | -1.59440443587724 |
| O | 1.24500383057720  | 0.85316349496014  | 1.70979667986416  |
| S | 2.61258900511554  | 0.94669999375087  | 2.46514286957463  |
| C | 2.58055735051784  | 2.68294291439454  | 3.03594536532123  |
| H | 1.61018000017461  | 2.90056035626533  | 3.49066300414576  |
| H | 3.39724807060788  | 2.84277645017657  | 3.74668874165409  |
| H | 2.73438842745598  | 3.29785891175927  | 2.14599796260260  |
| C | 2.25267068125954  | 0.15972080763615  | 4.07361552680499  |
| H | 2.17704355272107  | -0.90966742284091 | 3.86447720692001  |
| H | 3.08231058203516  | 0.35574488443655  | 4.76017072032314  |
| H | 1.31030957322298  | 0.55453296248537  | 4.46382902033831  |

**2a<sup>+</sup>: [Ru(CN)(Cl)<sub>2</sub>(S-DMSO)(O-DMSO)]<sup>+</sup>**

|    |                   |                   |                   |
|----|-------------------|-------------------|-------------------|
| Ru | 1.42228131861352  | -0.28515629943943 | -0.15918405235379 |
| S  | 1.45032309067447  | -1.55321432011436 | -2.03828034955878 |
| Cl | 3.21137871301803  | 1.00589394759604  | -0.86136745366347 |
| Cl | 2.72766429119895  | -1.84726558349540 | 1.07088930162317  |
| N  | -0.37315470711549 | -1.28589383647274 | 0.42769704304925  |
| N  | -1.32903727728713 | 0.53598096048117  | -0.57401532177081 |
| O  | 0.31666968743223  | -2.51695812843870 | -2.21054940458937 |
| C  | -0.04656215534337 | 0.93792224851274  | -0.84784635933927 |
| C  | -1.52471767971533 | -0.67943654077650 | 0.08537390675009  |



|   |                   |                   |                   |
|---|-------------------|-------------------|-------------------|
| N | -0.18727860282375 | 2.13999464475265  | -1.44852661934125 |
| C | -0.44712276452128 | -2.48814154563740 | 1.02816450113441  |
| H | 0.49949852709582  | -2.95673426582081 | 1.26959924023437  |
| C | -2.25639286626301 | 1.47690866605955  | -1.00339653889160 |
| H | -3.32141701434482 | 1.36493701548306  | -0.88652781523435 |
| C | -2.77676523593810 | -1.21574595615103 | 0.34065587712097  |
| H | -3.67735842102147 | -0.69301553180966 | 0.04163396050758  |
| C | -1.53465085387713 | 2.47721928670076  | -1.55135370188095 |
| H | -1.85732567124347 | 3.40109608696853  | -2.00575752551420 |
| C | -1.65742181549706 | -3.09067168479227 | 1.31957069723803  |
| H | -1.66236195416884 | -4.05965450719185 | 1.80532303242182  |
| C | -2.83967637891122 | -2.44699159634404 | 0.97401723667831  |
| H | -3.80253257205013 | -2.90054896897942 | 1.18507349153206  |
| C | 1.52544389985148  | -0.52151986401629 | -3.54089184786705 |
| H | 0.60267704054559  | 0.06304264986332  | -3.57008702540307 |
| H | 2.40297851103475  | 0.12766541143797  | -3.48595498714116 |
| H | 1.57121489069055  | -1.19666008872800 | -4.39959634979383 |
| C | 3.02461272592312  | -2.44908530587920 | -2.21698144879845 |
| H | 3.84636913164870  | -1.73562401993239 | -2.11028214805694 |
| H | 3.05970681775082  | -3.18873482969941 | -1.41597185652465 |
| H | 3.01611164948180  | -2.92835847586897 | -3.19956632322528 |
| C | 0.88827289584745  | 3.01855722883455  | -1.91284983989728 |
| H | 1.52010250574017  | 3.31530446096572  | -1.07392648728655 |
| H | 1.50698990697730  | 2.50699585493284  | -2.65207159863917 |
| H | 0.43312970494684  | 3.90088086403022  | -2.36559309659028 |
| O | 1.30301833035148  | 0.88898275780528  | 1.64744078516458  |
| S | 2.62273341448444  | 1.02048958405951  | 2.49670046678046  |
| C | 2.53996564807516  | 2.75365523247521  | 3.04512743977482  |
| H | 1.54419860385884  | 2.95927515898063  | 3.44683497196174  |
| H | 3.31342859490297  | 2.91886983234654  | 3.80126829571085  |
| H | 2.74085028449954  | 3.37346357524243  | 2.16848289366544  |
| C | 2.19770450095452  | 0.22213875983539  | 4.07705581329792  |
| H | 2.14942667341236  | -0.85010094189143 | 3.87620428894930  |
| H | 2.99116618968548  | 0.43453274295218  | 4.80022614512966  |
| H | 1.23285842142521  | 0.60240532116299  | 4.42333876263671  |

**2a'': [Ru(CN)(Cl)<sub>2</sub>(O-DMSO)<sub>2</sub>]**

|    |                   |                   |                   |
|----|-------------------|-------------------|-------------------|
| Ru | 1.34633837719755  | -0.13812621841017 | 0.05138526454529  |
| Cl | 3.34972961875578  | 1.14286933317280  | -0.54781895998837 |
| Cl | 2.85867452955019  | -1.80199293709388 | 1.27290278625666  |
| N  | -0.31952342335320 | -1.19449265978887 | 0.53024965624150  |
| N  | -1.30989822060570 | 0.47569812036927  | -0.66250921056207 |
| C  | 0.00696284456652  | 0.95263398033073  | -0.79310946427968 |
| C  | -1.49477485499377 | -0.69037114849739 | 0.05698132366468  |
| N  | -0.16834571781537 | 2.10025022075510  | -1.52468013959744 |
| C  | -0.38963086572268 | -2.33560095615471 | 1.25491865575117  |
| H  | 0.56668172090959  | -2.70353950425168 | 1.61359752991993  |
| C  | -2.22980596336879 | 1.30386987378720  | -1.29157679383833 |
| H  | -3.29135008581920 | 1.11836006423001  | -1.30791073969712 |
| C  | -2.72821221129630 | -1.28478494394330 | 0.27860409268251  |

|   |                   |                   |                   |
|---|-------------------|-------------------|-------------------|
| H | -3.63098251212448 | -0.83902064475248 | -0.12429488667708 |
| C | -1.50945975575906 | 2.31239608450205  | -1.82697303021666 |
| H | -1.83379456515849 | 3.16845427027852  | -2.39917601946821 |
| C | -1.58458110515163 | -2.98221253791193 | 1.51629205796152  |
| H | -1.57200826073412 | -3.89399666938450 | 2.10401605464677  |
| C | -2.77681424447407 | -2.45592516199798 | 1.02370365935948  |
| H | -3.72692310090235 | -2.94419605940688 | 1.21395246431658  |
| C | 0.88552251336939  | 3.00507134877035  | -1.95789339737291 |
| H | 1.83510510727680  | 2.64621381694368  | -1.55646455108287 |
| H | 0.93767527848961  | 3.02637952482832  | -3.05279660165900 |
| H | 0.68288897276673  | 4.01680302456871  | -1.58822069210099 |
| O | 1.21138375380075  | 0.94854025229266  | 1.86454254710248  |
| S | 2.58765355628117  | 1.05012068105236  | 2.61127223673184  |
| C | 2.54610629648514  | 2.78416879990088  | 3.18522356824133  |
| H | 1.57391405730496  | 2.99332153498400  | 3.63997094178916  |
| H | 3.36204163664841  | 2.94766547743322  | 3.89598080904446  |
| H | 2.69528395083279  | 3.39960522215473  | 2.29487147896744  |
| C | 2.23139795338981  | 0.24960935659491  | 4.21450680099277  |
| H | 2.16036859498058  | -0.81841582172423 | 3.99563923189098  |
| H | 3.06170925684449  | 0.44205045739597  | 4.90136149568455  |
| H | 1.28781291680036  | 0.63664304560055  | 4.60919075067277  |
| O | 1.60388181989648  | -1.31178976123764 | -1.69107804206667 |
| S | 3.08263182968293  | -1.80324156192823 | -1.87684305701102 |
| C | 3.31399099243754  | -1.54822608939469 | -3.67106477483442 |
| H | 3.39537733720176  | -0.46798525646698 | -3.81312719914272 |
| H | 4.23856851854811  | -2.04041866854679 | -3.98821251590457 |
| H | 2.44794124359716  | -1.94406625572246 | -4.20867254658082 |
| C | 2.89177253575163  | -3.61962217325870 | -1.90524457322541 |
| H | 3.83385166136784  | -4.07329716336865 | -2.22914195180338 |
| H | 2.67014665983558  | -3.90324072626057 | -0.87364365655520 |
| H | 2.06869135270952  | -3.88516157044327 | -2.57441060279893 |

**2a<sup>++</sup>: [Ru(CN)(Cl)<sub>2</sub>(O-DMSO)<sub>2</sub>]<sup>+</sup>**

|    |                   |                   |                   |
|----|-------------------|-------------------|-------------------|
| Ru | 1.49039267418226  | -0.10959854933315 | 0.05223683571934  |
| Cl | 3.40848748898351  | 1.14398056095230  | -0.53552874046006 |
| Cl | 2.97471107322149  | -1.71138795077171 | 1.22887080000667  |
| N  | -0.23759123001562 | -1.19097259376049 | 0.53490251446788  |
| N  | -1.21357875180064 | 0.49316514302688  | -0.66170255487420 |
| C  | 0.07485024137143  | 0.99193585704702  | -0.80556644894115 |
| C  | -1.39340931043188 | -0.67932494599113 | 0.05920210407694  |
| N  | -0.09849756602748 | 2.12450990302632  | -1.52582000963499 |
| C  | -0.28629125473726 | -2.32786391990268 | 1.25586982733735  |
| H  | 0.67364494781730  | -2.69113507620435 | 1.61158059242804  |
| C  | -2.14774861637040 | 1.30867746281403  | -1.28627692028200 |
| H  | -3.20696601187511 | 1.11077796465801  | -1.29716966144222 |
| C  | -2.62920202700572 | -1.27467971965856 | 0.27883830928997  |
| H  | -3.53702117122635 | -0.83660093330690 | -0.11890364299555 |
| C  | -1.44182559433075 | 2.32541276748539  | -1.82521865790193 |
| H  | -1.77605431046786 | 3.17878612539713  | -2.39570372526524 |
| C  | -1.47800428521181 | -2.97758418428805 | 1.51756045026227  |

|   |                   |                   |                   |
|---|-------------------|-------------------|-------------------|
| H | -1.47172319824100 | -3.89012843202011 | 2.10277956804551  |
| C | -2.66540843600094 | -2.44343323123928 | 1.02136100103802  |
| H | -3.61471599832224 | -2.93370957495073 | 1.21171922224505  |
| C | 0.94640763332673  | 3.04614693629236  | -1.97055569285913 |
| H | 1.89663219219551  | 2.73695801731627  | -1.53683498400902 |
| H | 1.01669367131449  | 3.02279479209606  | -3.06249382319508 |
| H | 0.69523026782455  | 4.05967507436098  | -1.64482008976590 |
| O | 1.26545756305191  | 0.93352262640551  | 1.79655792971097  |
| S | 2.59641447460156  | 1.09643199867827  | 2.67394969634893  |
| C | 2.37392129229762  | 2.80150519035149  | 3.26067917821758  |
| H | 1.35932324634460  | 2.92620366924996  | 3.64747429129312  |
| H | 3.12171120804196  | 2.99991973052356  | 4.03452357806670  |
| H | 2.54733466574759  | 3.45265664694415  | 2.40082130093632  |
| C | 2.15504288089240  | 0.20809967868504  | 4.19624582065643  |
| H | 2.17679922217582  | -0.85409760681791 | 3.94292367049030  |
| H | 2.91359026085680  | 0.43015218879235  | 4.95333434253763  |
| H | 1.16114064539655  | 0.52331857109514  | 4.52430699964223  |
| O | 1.64529677900585  | -1.24512232232126 | -1.64296090990673 |
| S | 3.10423831426295  | -1.83205832614304 | -1.94718322086279 |
| C | 3.14888816055432  | -1.63334379455928 | -3.75274628994427 |
| H | 3.25802837893476  | -0.56373531254046 | -3.94621951246183 |
| H | 4.02023065866566  | -2.17213871803752 | -4.13717117885394 |
| H | 2.22167280367751  | -2.01683608648967 | -4.18613100657190 |
| C | 2.81410301826769  | -3.62383652522180 | -1.86185254312972 |
| H | 3.69343424149355  | -4.13258179481787 | -2.26903306888873 |
| H | 2.69924479044252  | -3.86250965569866 | -0.80220604692426 |
| H | 1.91311496711611  | -3.87095165112360 | -2.42933930364662 |

**3a<sup>+</sup>: [Ru(CN)(bpy)(Cl)(S-DMSO)]<sup>+</sup>**

|    |                    |                   |                   |
|----|--------------------|-------------------|-------------------|
| Ru | 1.04556150563445   | -0.22395465303309 | 0.22903153456426  |
| S  | 0.72475533066874   | 1.25602882900285  | 1.95598380787824  |
| Cl | 2.88692552959639   | 1.05928433165706  | -0.65905409740132 |
| N  | -0.54100416526451  | -1.38280846060488 | 0.89124765245483  |
| N  | -1.692404444056655 | -0.06790086453533 | -0.58687735483057 |
| O  | 1.18972685637958   | 0.85707664683927  | 3.33538799160702  |
| C  | -0.47378652921616  | 0.58237135986024  | -0.77524351304526 |
| C  | -1.74109206331190  | -1.12891913654385 | 0.31504108901044  |
| N  | -0.77547608292621  | 1.55525091115818  | -1.67222873181864 |
| C  | -0.47821371075044  | -2.36956553473488 | 1.80855048118683  |
| H  | 0.49589109358337   | -2.53098474176480 | 2.25814888740808  |
| C  | -2.70374050339813  | 0.50401331965894  | -1.35174918136583 |
| H  | -3.72424418788567  | 0.15691008646166  | -1.35691473420830 |
| C  | -2.89239348832228  | -1.84156109669233 | 0.61798077401843  |
| H  | -3.83346114144965  | -1.60841452191220 | 0.13309069535085  |
| C  | -2.12209627809772  | 1.51694415125023  | -2.02901296509944 |
| H  | -2.54545533303057  | 2.21561226802103  | -2.73496251127878 |
| C  | -1.58169510884788  | -3.12203237975847 | 2.16516403516892  |
| H  | -1.47800433500080  | -3.90192437535476 | 2.91100246873761  |
| C  | -2.80722616812141  | -2.85745700266403 | 1.55909133558692  |
| H  | -3.68996457178151  | -3.43234061558306 | 1.81836521736502  |

|   |                   |                   |                   |
|---|-------------------|-------------------|-------------------|
| C | 0.16807365345812  | 2.52482465121478  | -2.22982347358140 |
| H | 1.15618511528796  | 2.33208612026668  | -1.80701468191320 |
| H | 0.21191776760761  | 2.41170324773656  | -3.31741961975772 |
| H | -0.16193741096478 | 3.54054209338582  | -1.98925579926704 |
| C | 1.38843412886254  | 2.92432982717812  | 1.63848639388555  |
| H | 2.46695433104886  | 2.81540810067031  | 1.51472182765707  |
| H | 0.95432674871843  | 3.32074002827161  | 0.71741138468731  |
| H | 1.14083556742364  | 3.53950644396899  | 2.50777429410679  |
| C | -1.03754991598564 | 1.70434830058550  | 2.16870640448143  |
| H | -1.42659028320762 | 2.16669942001299  | 1.25751824660927  |
| H | -1.58188371397209 | 0.78653074041074  | 2.40277638351714  |
| H | -1.08932832776216 | 2.39211876732255  | 3.01667108976276  |
| N | 2.60102911216518  | -1.41658703732350 | 1.11553992282899  |
| C | 3.14107040293410  | -1.24836833783331 | 2.33455249712718  |
| C | 3.15248545231996  | -2.33552183884671 | 0.28210608819247  |
| C | 4.23774218981889  | -1.97542019424686 | 2.77274147307365  |
| H | 2.66430559675001  | -0.50308444908292 | 2.96539215655031  |
| C | 4.25683754482654  | -3.09383027062357 | 0.66648026353845  |
| C | 4.80987219159815  | -2.91242171785927 | 1.92392548456928  |
| H | 4.63351844569407  | -1.79177450858937 | 3.76576415161184  |
| H | 4.69363567255788  | -3.81591665526657 | -0.01230017282601 |
| H | 5.67503831075856  | -3.49120157221594 | 2.23095382365422  |
| C | 2.50707250079490  | -2.47207038987759 | -1.02721124696464 |
| C | 2.90782210148161  | -3.40065518667338 | -1.98866634838509 |
| N | 1.46425406930054  | -1.63616663225931 | -1.26095199913757 |
| C | 2.24266114066849  | -3.47245975937348 | -3.20027166146894 |
| H | 3.74059299005616  | -4.06455650343712 | -1.79349002699604 |
| C | 0.82395262602186  | -1.71150577025546 | -2.44040202932375 |
| C | 1.17718283478879  | -2.61019938100451 | -3.43035009513589 |
| H | 2.55245359917417  | -4.18879560656164 | -3.95413600411245 |
| H | 0.00698165151715  | -1.01416531480509 | -2.58938880323647 |
| H | 0.62685169836696  | -2.62336513561681 | -4.36468280503679 |

**3a<sup>2+</sup>: [Ru(CN)(bpy)(Cl)(S-DMSO)]<sup>2+</sup>**

|    |                   |                   |                   |
|----|-------------------|-------------------|-------------------|
| Ru | 1.00185164082939  | -0.19449764021723 | 0.13605259491784  |
| S  | 0.62723050819801  | 1.24286287771574  | 1.93965175803701  |
| Cl | 2.55026920940836  | 1.19122320036143  | -0.83329439591370 |
| N  | -0.55367568963799 | -1.44548811840345 | 0.87872965952053  |
| N  | -1.81844456375925 | -0.18872146227288 | -0.56341394989900 |
| O  | 0.47348671132696  | 0.47777402221520  | 3.22436273381962  |
| C  | -0.66284902032959 | 0.50501715588393  | -0.81929539630203 |
| C  | -1.78581922313151 | -1.23099455804794 | 0.37243966670044  |
| N  | -1.01534631796382 | 1.44643817130967  | -1.71821409734884 |
| C  | -0.41023368901199 | -2.39305675675912 | 1.82570249724052  |
| H  | 0.58470763372467  | -2.52482072263084 | 2.23279965012865  |
| C  | -2.88360202242488 | 0.32421392559553  | -1.29676241700949 |
| H  | -3.88763332579112 | -0.06613501381805 | -1.25210970771400 |
| C  | -2.90174584358464 | -1.95304601011501 | 0.76128269076284  |
| H  | -3.87579797038276 | -1.75181886662120 | 0.33059737804788  |
| C  | -2.37266678616868 | 1.34569877030595  | -2.01826414852063 |

|   |                   |                   |                   |
|---|-------------------|-------------------|-------------------|
| H | -2.85356689480935 | 2.01114438173441  | -2.71963040267273 |
| C | -1.47575074986946 | -3.15426453724054 | 2.26950159330426  |
| H | -1.31218616209322 | -3.90425884852448 | 3.03512378900037  |
| C | -2.73749972328625 | -2.93618617832767 | 1.72704830050529  |
| H | -3.59095034405344 | -3.51967978778961 | 2.05701807353732  |
| C | -0.12647354090381 | 2.43370459248918  | -2.34451640151197 |
| H | 0.42726032608865  | 2.98243887798365  | -1.58111164027036 |
| H | 0.58588554178663  | 1.93683287336157  | -3.00752073125134 |
| H | -0.73894860673296 | 3.12847382897962  | -2.92052292750197 |
| C | 1.92176947495870  | 2.50452777047884  | 2.16668841812608  |
| H | 2.87922695706901  | 1.98680794797747  | 2.25666029288920  |
| H | 1.94271215198975  | 3.17118542894357  | 1.30161307440458  |
| H | 1.67793194908442  | 3.03740619398894  | 3.09036995467936  |
| C | -0.82578889810090 | 2.32945449420850  | 1.77032007228994  |
| H | -0.70533098508196 | 2.97460820581724  | 0.89591635791075  |
| H | -1.70629385350672 | 1.69063853245289  | 1.66894755942305  |
| H | -0.89499042235550 | 2.91821620330208  | 2.68951902160425  |
| N | 2.52812874343200  | -1.36893162884116 | 1.07421020032437  |
| C | 2.98111951824811  | -1.23490474372401 | 2.33568978725067  |
| C | 3.13400062271232  | -2.25671436843732 | 0.23926972434243  |
| C | 4.06856715734704  | -1.94736299347849 | 2.81163346470583  |
| H | 2.42993176637500  | -0.55360450596622 | 2.97773972225103  |
| C | 4.23530216822705  | -2.99496977408063 | 0.66622776237739  |
| C | 4.71328975578454  | -2.83468940057868 | 1.95840560251017  |
| H | 4.39828099201785  | -1.80055473512358 | 3.83449199893813  |
| H | 4.72399342645681  | -3.69358034783963 | -0.00164193067841 |
| H | 5.57419268157771  | -3.40337732498651 | 2.29583565788176  |
| C | 2.54601561941449  | -2.38954781147496 | -1.09907878371667 |
| C | 3.02100578499832  | -3.27776051744348 | -2.06264201598096 |
| N | 1.47491731958114  | -1.59717343602707 | -1.35720046480700 |
| C | 2.39533648538756  | -3.35456806995842 | -3.29704537643887 |
| H | 3.87711936242317  | -3.90834712080353 | -1.85728336438046 |
| C | 0.87109756793956  | -1.67578433496695 | -2.55400990988340 |
| C | 1.29691062975083  | -2.54159600534937 | -3.54662738410631 |
| H | 2.76189590997007  | -4.04055538499636 | -4.05387901397247 |
| H | 0.02404628015424  | -1.01728102746280 | -2.71429030526914 |
| H | 0.77551073671740  | -2.56799542279812 | -4.49729429228185 |

**3a<sup>+</sup>: [Ru(CN)(bpy)(Cl)(O-DMSO)]<sup>+</sup>**

|    |                   |                   |                   |
|----|-------------------|-------------------|-------------------|
| Ru | 0.76823671075798  | -0.33624879859714 | -0.01073583931933 |
| Cl | 2.42801923642403  | 1.28384027766209  | -0.67978845980666 |
| N  | -0.74044375043802 | -1.56192432594954 | 0.65338100676470  |
| N  | -1.99946696101067 | -0.19611529928216 | -0.68124385593539 |
| C  | -0.77201329578201 | 0.36715944908893  | -1.02691337185997 |
| C  | -1.99124057263494 | -1.24678112960256 | 0.22787805125801  |
| N  | -1.10138671056522 | 1.26052931640432  | -1.99874573655865 |
| C  | -0.61555731007179 | -2.59202008005498 | 1.51658446093599  |
| H  | 0.39683089680849  | -2.81890711733344 | 1.83392360919595  |
| C  | -3.04210543349746 | 0.34635045215815  | -1.42600405500418 |
| H  | -4.07218671675048 | 0.04447442363953  | -1.32865232810826 |

|   |                   |                   |                   |
|---|-------------------|-------------------|-------------------|
| C | -3.12771838256172 | -1.92299253753137 | 0.64907534897618  |
| H | -4.10789557251038 | -1.63288158030552 | 0.28796441349417  |
| C | -2.47240233129198 | 1.26118670479060  | -2.24064414778598 |
| H | -2.92273443301706 | 1.91007357458725  | -2.97648623122777 |
| C | -1.69872273235214 | -3.31730532966133 | 1.97465722776460  |
| H | -1.53891604032884 | -4.13714014936908 | 2.66583786943012  |
| C | -2.97745879066615 | -2.97585267164539 | 1.53870516638810  |
| H | -3.84727486511647 | -3.52387819383777 | 1.88498257206100  |
| C | -0.15771007302078 | 2.14121137073386  | -2.68390123887885 |
| H | 0.81741987975245  | 1.65539728666823  | -2.72839221907975 |
| H | -0.53138350850845 | 2.34522327144020  | -3.69044368501915 |
| H | -0.04273085011926 | 3.08161285471730  | -2.13583535884074 |
| N | 2.33998015150385  | -1.26124984510865 | 1.04648317293047  |
| C | 2.69182039222036  | -1.01424701390703 | 2.31715291405315  |
| C | 3.11113693614312  | -2.08053380569816 | 0.28884160502970  |
| C | 3.82198995164668  | -1.56786757983588 | 2.89411043497585  |
| H | 2.03286382991771  | -0.34187324564813 | 2.86021302544065  |
| C | 4.26644217778971  | -2.66288123158698 | 0.81140962765746  |
| C | 4.62601799992442  | -2.40399587514191 | 2.12416216996761  |
| H | 4.06976503354243  | -1.33964284656017 | 3.92514336614108  |
| H | 4.88665718352513  | -3.30667017934052 | 0.19915536051097  |
| H | 5.52461110539110  | -2.84668710643770 | 2.54137622268427  |
| C | 2.61400885258961  | -2.29965503546869 | -1.06918442056757 |
| C | 3.22810279165292  | -3.14905336407149 | -1.98807914318618 |
| N | 1.46466151095445  | -1.62889824919858 | -1.38934488486888 |
| C | 2.67678177088031  | -3.33181171841175 | -3.24403598601283 |
| H | 4.14057473575682  | -3.66716151084691 | -1.71798479380858 |
| C | 0.93033344299106  | -1.82396013153891 | -2.61412250059281 |
| C | 1.49988452818542  | -2.65723942925660 | -3.55649294274854 |
| H | 3.15265744210167  | -3.98821108420446 | -3.96464401394523 |
| H | 0.01899189266461  | -1.27544339401635 | -2.82458085666386 |
| H | 1.02397593798784  | -2.76789816995202 | -4.52483785670237 |
| O | 0.29785329866418  | 0.90341423685141  | 1.67694510182790  |
| S | 0.31379425101879  | 2.45806935572744  | 1.44500356554224  |
| C | 1.82162953545945  | 3.04790763160635  | 2.28388092218678  |
| C | -0.89408433598463 | 3.01611508618161  | 2.69112982208341  |
| H | 2.66307478814678  | 2.68391000042504  | 1.69074120705766  |
| H | 1.80477996928167  | 4.14223902887149  | 2.29537951709287  |
| H | 1.83960083148447  | 2.64488115850991  | 3.30034384010037  |
| H | -0.86275942865576 | 4.10812860108202  | 2.75164825307050  |
| H | -1.88027650502174 | 2.68913376901668  | 2.35388400172379  |
| H | -0.65082846526163 | 2.56177017923879  | 3.65530007017595  |

**3a<sup>12+</sup>: [Ru(CN)(bpy)(Cl)(O-DMSO)]<sup>2+</sup>**

|    |                   |                   |                   |
|----|-------------------|-------------------|-------------------|
| Ru | 0.81109492455066  | -0.16920464947891 | -0.15749942846765 |
| Cl | 2.66620081605977  | 1.11011523122281  | -0.70606740693007 |
| N  | -0.94942647617477 | -1.23883661893595 | 0.23833552923716  |
| N  | -1.84617299495715 | 0.38491892306979  | -1.11169885536782 |
| C  | -0.54784670157055 | 0.84510010170505  | -1.24863663267462 |
| C  | -2.07710343957050 | -0.73070619583599 | -0.30839097345109 |

|   |                   |                   |                   |
|---|-------------------|-------------------|-------------------|
| N | -0.65505791473024 | 1.88251464678905  | -2.10613115763853 |
| C | -1.04568423838950 | -2.32791463803480 | 1.02657797568069  |
| H | -0.11537164797718 | -2.69987107845630 | 1.44321814081512  |
| C | -2.73373428523908 | 1.13649147376650  | -1.87577448246228 |
| H | -3.79441841813443 | 0.95035120739144  | -1.92656506852804 |
| C | -3.32950854329124 | -1.28564247404588 | -0.08901610679569 |
| H | -4.21719951745270 | -0.85817237659243 | -0.54074535304416 |
| C | -1.97994909752717 | 2.07202841061990  | -2.49258753090103 |
| H | -2.26860770003859 | 2.85329163544900  | -3.17972268248541 |
| C | -2.25723190743058 | -2.93551957216652 | 1.29324835025915  |
| H | -2.29228594169124 | -3.80992398478510 | 1.93316216734901  |
| C | -3.41405821341793 | -2.40529948194075 | 0.72552803553082  |
| H | -4.37991885398947 | -2.86307362343901 | 0.91469499620723  |
| C | 0.44930553907915  | 2.71715282904387  | -2.59383011181283 |
| H | 1.24337421438034  | 2.08815933957187  | -2.99845676420049 |
| H | 0.06412690371754  | 3.37328976652175  | -3.37558167692669 |
| H | 0.85811098346930  | 3.31717703571459  | -1.77802929246447 |
| N | 2.11445807402845  | -1.38374536642629 | 0.99336657581392  |
| C | 2.43918841353512  | -1.18354467543104 | 2.27820916794091  |
| C | 2.71818987507698  | -2.37730464360703 | 0.29460499244307  |
| C | 3.37516414812366  | -1.96910847541092 | 2.93196949902928  |
| H | 1.92484164194069  | -0.36545570318749 | 2.77407490042543  |
| C | 3.66962748765938  | -3.19886197752424 | 0.89663992615631  |
| C | 4.00133744648605  | -2.99160713357638 | 2.22749765779467  |
| H | 3.61060362532768  | -1.77504510101321 | 3.97281476112880  |
| H | 4.15536570491721  | -3.98982098646697 | 0.33784059593066  |
| H | 4.74404512986619  | -3.62031173013362 | 2.70808296726932  |
| C | 2.28901996550129  | -2.50092389485541 | -1.10105568599655 |
| C | 2.77260860709765  | -3.46750267470896 | -1.97972384991308 |
| N | 1.35472273403359  | -1.59932621395777 | -1.51877039720450 |
| C | 2.30577597161064  | -3.51245204365492 | -3.28389561908538 |
| H | 3.51622770635422  | -4.18281471447238 | -1.64973676091058 |
| C | 0.89959821356800  | -1.64997062057117 | -2.78514232410794 |
| C | 1.35012667030028  | -2.58867414221025 | -3.69397123154303 |
| H | 2.68429552724212  | -4.26025110727177 | -3.97339178237056 |
| H | 0.16243857971872  | -0.90332806038231 | -3.05970567868190 |
| H | 0.95916651749784  | -2.58777894832026 | -4.70549945110713 |
| O | 0.38933907685570  | 1.01344723586519  | 1.52521646507253  |
| S | 0.31767526832695  | 2.59194915551069  | 1.39293556948686  |
| C | -0.92108498125879 | 3.02809579221304  | 2.64638481258876  |
| C | 1.81208667516653  | 3.17026046469966  | 2.25086517360469  |
| H | -0.92224671157606 | 4.11660908904218  | 2.76165473258538  |
| H | -0.66701865142886 | 2.53397035288581  | 3.58797410385077  |
| H | -1.89363825256168 | 2.69193066716327  | 2.27995680277393  |
| H | 1.77120486551393  | 4.26342088804859  | 2.29878414543248  |
| H | 1.84252365324479  | 2.73469321987996  | 3.25317474194074  |
| H | 2.66681952815729  | 2.85222544072005  | 1.64951351872384  |
